# Supplementary material for: Assessing the sustainability of the Nigerian urban reproductive health initiative facility-level programming: longitudinal analysis of service quality
Source: Springer Nature journal article supplement (doi:10.1186/s12913-019-4388-3), 2019-08-09
Supplement: MOESM1 [file 17054230]

**IDENTIFICATION**

| BACKGROUND INFORMATION |                                                                       |                                                                                                                                                                                                                                                                                                                                                 |      |
|------------------------|-----------------------------------------------------------------------|-------------------------------------------------------------------------------------------------------------------------------------------------------------------------------------------------------------------------------------------------------------------------------------------------------------------------------------------------|------|
| Source                 | Questions                                                             | Coding                                                                                                                                                                                                                                                                                                                                          | Skip |
| Q1.                    | RECORD THE TIME<br><br>(IN 24 HOUR FORMAT)                            | Hour ..... <input type="text"/> <input type="text"/> Minutes ..... <input type="text"/> <input type="text"/>                                                                                                                                                                                                                                    |      |
| Q2.                    | SEX OF PROVIDER INTERVIEWED                                           | MALE.....1<br>FEMALE.....2                                                                                                                                                                                                                                                                                                                      |      |
| Q3.                    | How long have you been working here at this facility?                 | YEARS... <input type="text"/> <input type="text"/><br><br>LESS THAN ONE YEAR =00<br>DON'T KNOW = 98                                                                                                                                                                                                                                             |      |
| Q4.                    | What cadre of staff are you?                                          | OBSTETRICIAN/GYNECOLOGIST.....01<br>GENERAL SURGEON.....02<br>PEDIATRICIAN.....03<br>GENERAL PHYSICIAN.....04<br>THEATRE NURSE.....05<br>NURSE/MIDWIFE.....06<br>NURSE.....07<br>MIDWIFE.....08<br>COMMUNITY HEALTH EXTENSION WORKER (CHEW)...09<br>COMMUNITY HEALTH OFFICER (CHO).....10<br>VCT COUNSELOR.....11<br>OTHER .....96<br>(SPECIFY) |      |
| Q5.                    | How old were you at your last birthday?                               | YEARS..... <input type="text"/> <input type="text"/>                                                                                                                                                                                                                                                                                            |      |
| Q6.                    | What is your religion?                                                | CHRISTIAN-CATHOLIC.....1<br>CHRISTIAN-PROTESTANT/OTHER CHRISTIAN.....2<br>ISLAM.....3<br>TRADITIONAL.....4<br>NO RELIGION .....5<br><br>OTHER .....6<br>(SPECIFY)                                                                                                                                                                               |      |
| Q7.                    | In which department or unit do you work?                              | GENERAL OUTPATIENT DEPARTMENT (GOPD) ... 01<br>OBSTETRICS AND GYNECOLOGY .....02<br>SURGERY .....03<br>PEDIATRICS .....04<br>FAMILY PLANNING DEPARTMENT .....05<br>INFANT AND CHILD CARE .....06<br>ANC.....07<br>HIV TESTING OR STI/HIV TREATMENT.....08<br>Other .....96<br>(SPECIFY)                                                         |      |
| Q7a                    | Has your salary payment ever been delayed by more than one week?      | YES.....1<br>NO.....2                                                                                                                                                                                                                                                                                                                           |      |
| Q7b                    | How many times in the last year has your salary payment been delayed? | NUMBER OF DELAYED PAYMENTS <input type="text"/> <input type="text"/><br>EVERY PAY PERIOD.....00<br>NEVER.....97                                                                                                                                                                                                                                 |      |
| Q7c                    | When was the last time your salary payment was delayed?               | WITHIN THE PAST MONTH.....1<br>WITHIN THE PAST 2-6 MONTHS.....2<br>WITHIN THE PAST 7-11 MONTHS.....3<br>WITHIN THE PAST 1- 3 YEARS.....4<br>WITHIN THE PAST 4-5 YEARS.....5<br>MORE THAN 5 YEARS AGO.....6<br>DON'T REMEMBER.....8<br>NEVER.....97                                                                                              |      |
| Q8.                    | How many years have you been working as a health care provider?       | NUMBER OF YEARS: <input type="text"/> <input type="text"/>                                                                                                                                                                                                                                                                                      |      |

**IDENTIFICATION**

|     |                                                                     |                                                                                |  |
|-----|---------------------------------------------------------------------|--------------------------------------------------------------------------------|--|
| Q9. | How many years ago did you finish your <b>pre-service</b> training? | YEARS AGO..... [ ][ ]<br>LESS THAN ONE YEAR = 00<br>NO PRE-SERVICE TRAINING=97 |  |
|-----|---------------------------------------------------------------------|--------------------------------------------------------------------------------|--|

|      |                                                                                                                                                                  |                                                                                                                                                                                                                                                                                                                                                               |                          |
|------|------------------------------------------------------------------------------------------------------------------------------------------------------------------|---------------------------------------------------------------------------------------------------------------------------------------------------------------------------------------------------------------------------------------------------------------------------------------------------------------------------------------------------------------|--------------------------|
| Q10. | Have you received any <b>in-service</b> training on family planning?                                                                                             | YES.....1<br>NO.....2                                                                                                                                                                                                                                                                                                                                         | → Q13a                   |
| Q11. | Who provided this training?<br><br><b>MULTIPLE RESPONSES POSSIBLE.</b><br><br><b>CIRCLE ALL MENTIONED.</b>                                                       | NURHI/FPPN .....A<br>UNFPA .....B<br>WHO .....C<br>SFH .....D<br>JPIEGO .....E<br>MARIE STOPES .....F<br>PATH .....G<br>PPFN .....H<br>STATE/ MOH .....I<br>ISHIP .....J<br>OTHER .....X<br>(SPECIFY)                                                                                                                                                         |                          |
| Q12. | What types of in-service trainings did you receive?<br><br>PROBE – Anything else?<br><br><b>MULTIPLE RESPONSES POSSIBLE.</b><br><br><b>CIRCLE ALL MENTIONED.</b> | FP INTERPERSONAL COMMUNICATION AND COUNSELLING.....A<br>INITIAL FP TRAININGS .....B<br>REFRESHER FP TRAINING .....C<br>LONG-ACTING AND PERMANENT FP METHODS....D<br>TRAINING OF TRAINERS OF FP PROVIDERS .....E<br>CONTRACEPTIVE LOGISTICS AND MANAGEMENT SYSTEM (CLMS) TRAINING .....F<br>SUPERVISORY SKILLS TRAINING.....G<br><br>OTHER .....X<br>(SPECIFY) |                          |
| Q13. | How long ago was the last <b>in-service</b> family planning training that you attended?                                                                          | DAYS AGO.....1 [ ][ ]<br>WEEKS AGO.....2 [ ][ ]<br>MONTHS AGO.....3 [ ][ ]<br>YEARS AGO.....4 [ ][ ]<br><br>DON'T REMEMBER.....998                                                                                                                                                                                                                            |                          |
| Q13a | Has this facility ever participated in a Whole Site Orientation?                                                                                                 | YES.....1<br>NO.....2<br>DON'T KNOW.....8                                                                                                                                                                                                                                                                                                                     | → →<br>→ →<br>Q14<br>Q14 |
| Q13b | When was the last Whole Site Orientation?                                                                                                                        | 2017.....1<br>2016.....2<br>2015.....3<br>2014.....4<br>2013.....5<br>2012.....6<br>BEFORE 2012.....7<br>DON'T KNOW.....8                                                                                                                                                                                                                                     |                          |
| Q13c | Which organization coordinated the Whole Site Orientation?<br><br>MULTIPLE RESPONSES POSSIBLE                                                                    | NURHI .....A<br>MOH .....B<br>MARIE STOPES .....C<br>PPFN.....D<br>SFH.....E<br>OTHER .....X                                                                                                                                                                                                                                                                  |                          |
| Q14. | Are you a member of the NURHI supported Family Planning Provider Network (FPPN)?                                                                                 | YES.....1<br>NO.....2                                                                                                                                                                                                                                                                                                                                         | → Q22                    |
| Q15. | Have you attended any of the FPPN meetings?                                                                                                                      | YES.....1<br>NO.....2<br>DON'T KNOW.....8                                                                                                                                                                                                                                                                                                                     |                          |

|      |                                                                                                                                      |                                                                                                                                                                                    |                            |
|------|--------------------------------------------------------------------------------------------------------------------------------------|------------------------------------------------------------------------------------------------------------------------------------------------------------------------------------|----------------------------|
| Q19. | Do you discuss family planning with other providers who are NOT FPPN members?                                                        | YES.....1<br>NO.....2<br>DON'T KNOW NON-FPPN PROVIDERS .....8                                                                                                                      | → Q22a<br>→ Q22a<br>→ Q22a |
| Q22. | Have you interacted with providers who are members of the FPPN?                                                                      | YES.....1<br>NO.....2<br>DON'T KNOW/DON'T KNOW FPPN MEMBERS ....8                                                                                                                  |                            |
| Q22a | Have you participated in the quarterly Facility Committee Meetings/ NURHI QIT?                                                       | YES ..... 1<br>NO ..... 2                                                                                                                                                          |                            |
| Q22b | Have you ever connected with the NURHI WhatsApp FP forum?                                                                            | YES ..... 1<br>NO ..... 2                                                                                                                                                          | → Q22d                     |
| Q22c | When was the last time you connected with the NURHI WhatsApp FP forum?                                                               | DAYS AGO.....1<br>WEEKS AGO.....2<br>MONTHS AGO.....3<br>YEARS AGO.....4<br>DON'T REMEMBER/DON'T KNOW.....998                                                                      |                            |
| Q22d | Have you ever done community mobilization activities with a NURHI social mobilizer?                                                  | YES ..... 1<br>NO ..... 2<br>DON'T KNOW.....8                                                                                                                                      |                            |
| Q22e | Have you ever traveled outside your usual duty station with a NURHI social mobilizer to provide clinical services?                   | YES ..... 1<br>NO ..... 2                                                                                                                                                          |                            |
| Q22f | In the last year, have you made a family planning health referral in the community while working alongside a NURHI social mobilizer? | YES ..... 1<br>NO ..... 2                                                                                                                                                          |                            |
| Q22g | Do you have the NURHI movie downloaded on your smartphone or on a CD?<br><br>CIRCLE ALL THAT APPLY                                   | YES, APP OBSERVED.....A<br>YES, APP REPORTED, NOT SEEN.....B<br>YES, CD OBSERVED.....C<br>YES, CD REPORTED, NOT SEEN.....D<br>NO, HAS NEITHER APP NOR CD.....Y<br>DON'T KNOW.....Z | → Q28<br>→ Q28             |
| Q22h | How often do you watch the NURHI movie by app or CD?                                                                                 | EVERY DAY ..... 1<br>WEEKLY ..... 2<br>MONTHLY.....3<br>QUARTERLY.....4<br>NEVER.....5<br>OTHER.....6<br>DON'T KNOW.....8                                                          |                            |

**TRAINING ON FAMILY PLANNING**

Now, I will ask you few questions related to training on FP.

**Q28. CHECK Q09 AND Q10 ON PRE-SERVICE AND IN-SERVICE TRAINING:**

**HAS HAD BOTH PRE AND IN-SERVICE TRAINING**   
 (Q9=00 OR HIGHER AND Q10=1)  
**THEN ANSWER Q28a-Q28d**

**HAS HAD IN-SERVICE TRAINING ONLY**  → Q28b  
 (Q9=97 AND Q10=1)

**HAS HAD PRE-SERVICE TRAINING ONLY**   
 (Q9=00 OR GREATER AND Q10=2)  
**THEN ANSWER 28a ONLY**

**HAS NOT HAD ANY PRE OR IN SERVICE TRAINING**  → Q29a  
 (Q9=97 AND Q10=2)

| TOPICS |                                                        | Q28a. Did your <b>pre-service</b> training cover TOPIC? | Q28b. Have you ever attended an <b>in-service</b> training on TOPIC? | Q28c. What year was your most recent <b>in-service</b> training on TOPIC? | Q28d. Which organization or government ministry conducted this training? |
|--------|--------------------------------------------------------|---------------------------------------------------------|----------------------------------------------------------------------|---------------------------------------------------------------------------|--------------------------------------------------------------------------|
| (01)   | Contraceptive technology update                        | YES .....1<br>NO .....2<br>DK.....8                     | YES .....1<br>NO .....2 →(02)                                        | [ ] [ ] [ ] [ ] [ ]<br>DK=9998                                            | _____                                                                    |
| (02)   | Exclusive breastfeeding counseling/LAM                 | YES .....1<br>NO .....2<br>DK.....8                     | YES .....1<br>NO .....2 →(03)                                        | [ ] [ ] [ ] [ ] [ ]<br>DK=9998                                            | _____                                                                    |
| (03)   | Natural family planning (rhythm method, etc.)          | YES .....1<br>NO .....2<br>DK.....8                     | YES .....1<br>NO .....2 →(04)                                        | [ ] [ ] [ ] [ ] [ ]<br>DK=9998                                            | _____                                                                    |
| (04)   | SDM/Cycle beads                                        | YES .....1<br>NO .....2<br>DK.....8                     | YES .....1<br>NO .....2 →(05)                                        | [ ] [ ] [ ] [ ] [ ]<br>DK=9998                                            | _____                                                                    |
| (05)   | Emergency Contraceptive                                | YES .....1<br>NO .....2<br>DK.....8                     | YES .....1<br>NO .....2 →(06)                                        | [ ] [ ] [ ] [ ] [ ]<br>DK=9998                                            | _____                                                                    |
| (06)   | Oral pills                                             | YES .....1<br>NO .....2<br>DK.....8                     | YES .....1<br>NO .....2 →(07)                                        | [ ] [ ] [ ] [ ] [ ]<br>DK=9998                                            | _____                                                                    |
| (07)   | FP counseling skills                                   | YES .....1<br>NO .....2<br>DK.....8                     | YES .....1<br>NO .....2 →(08)                                        | [ ] [ ] [ ] [ ] [ ]<br>DK=9998                                            | _____                                                                    |
| (08)   | Clinical skills on IUD                                 | YES .....1<br>NO .....2<br>DK.....8                     | YES .....1<br>NO .....2 →(09)                                        | [ ] [ ] [ ] [ ] [ ]<br>DK=9998                                            | _____                                                                    |
| (09)   | Clinical skills on injectable contraceptive            | YES .....1<br>NO .....2<br>DK.....8                     | YES .....1<br>NO .....2 →(10)                                        | [ ] [ ] [ ] [ ] [ ]<br>DK=9998                                            | _____                                                                    |
| (10)   | Clinical skills on implant                             | YES .....1<br>NO .....2<br>DK.....8                     | YES .....1<br>NO .....2 →(11)                                        | [ ] [ ] [ ] [ ] [ ]<br>DK=9998                                            | _____                                                                    |
| (11)   | Clinical skills on Female Sterilization                | YES .....1<br>NO .....2<br>DK.....8                     | YES .....1<br>NO .....2 →(12)                                        | [ ] [ ] [ ] [ ] [ ]<br>DK=9998                                            | _____                                                                    |
| (12)   | Clinical skills on male sterilization                  | YES .....1<br>NO .....2<br>DK.....8                     | YES .....1<br>NO .....2 →(13)                                        | [ ] [ ] [ ] [ ] [ ]<br>DK=9998                                            | _____                                                                    |
| (13)   | Management of incomplete abortion (Post-Abortion Care) | YES .....1<br>NO .....2<br>DK.....8                     | YES .....1<br>NO .....2 →(14)                                        | [ ] [ ] [ ] [ ] [ ]<br>DK=9998                                            | _____                                                                    |
| (14)   | Manual vacuum aspiration (MVA)                         | YES .....1<br>NO .....2<br>DK.....8                     | YES .....1<br>NO .....2 →(Q29a)                                      | [ ] [ ] [ ] [ ] [ ]<br>DK=9998                                            | _____                                                                    |

| <b>Now I would like to ask you some questions about your knowledge and provision of various methods of family planning. If you have provided a particular method before, we are also interested in the availability and quality of the materials required to provide that method.</b> |                                                                                                                                                                                                                                                                                                                                                                                                      |                                                                              |                                                                                                                           |                                                                                                                                 |                                                                                                          |                                                                                                                    |
|---------------------------------------------------------------------------------------------------------------------------------------------------------------------------------------------------------------------------------------------------------------------------------------|------------------------------------------------------------------------------------------------------------------------------------------------------------------------------------------------------------------------------------------------------------------------------------------------------------------------------------------------------------------------------------------------------|------------------------------------------------------------------------------|---------------------------------------------------------------------------------------------------------------------------|---------------------------------------------------------------------------------------------------------------------------------|----------------------------------------------------------------------------------------------------------|--------------------------------------------------------------------------------------------------------------------|
| METHOD                                                                                                                                                                                                                                                                                | 29a. Can you please tell me which of the following best describes your knowledge of [METHOD]:<br>1. You know METHOD sufficiently well to counsel and provide/assist in provision to a client;<br>2. You know METHOD sufficiently well to counsel, but not to provide;<br>3. You know little about METHOD and would not feel comfortable counseling or providing;<br>8. You do not know METHOD at all | 29b. Have you provided (assisted with) [METHOD] to clients at this facility? | 29c. Have you experienced any stockouts in this facility that lasted more than 24 hours of [METHOD] in the last one year? | 29d. If yes, how many total days of stockouts did this facility have in the last ONE YEAR of [METHOD] (all stockouts combined)? | 29e. Have you experienced a lack of essential equipment needed to provide [METHOD] in the last ONE YEAR? | 29f. If Yes, how many total days did you lack essential equipment needed to provide [METHOD] in the last ONE YEAR? |
| (01) Combined oral pill                                                                                                                                                                                                                                                               | PROVIDE & COUNSEL.....1<br>COUNSEL, NOT PROVIDE.....2<br>KNOW LITTLE ABOUT.....3<br>DO NOT KNOW.....8 } (02)                                                                                                                                                                                                                                                                                         | YES.....1<br>NO.....2 → (02)                                                 | YES.....1<br>NO.....2 → (02)<br>PRESCRIPTION ONLY.....3 → (02)                                                            | DAYS...<br><input type="text"/> <input type="text"/> <input type="text"/><br>CONSTANT PROBLEM...995<br>DON'T KNOW..998          |                                                                                                          |                                                                                                                    |
| (02) Progestin-only pill                                                                                                                                                                                                                                                              | PROVIDE & COUNSEL.....1<br>COUNSEL, NOT PROVIDE.....2<br>KNOW LITTLE ABOUT.....3<br>DO NOT KNOW.....8 } (03)                                                                                                                                                                                                                                                                                         | YES.....1<br>NO.....2 → (03)                                                 | YES.....1<br>NO.....2 → (03)<br>PRESCRIPTION ONLY.....3 → (03)                                                            | DAYS...<br><input type="text"/> <input type="text"/> <input type="text"/><br>CONSTANT PROBLEM...995<br>DON'T KNOW..998          |                                                                                                          |                                                                                                                    |
| (03) Injectables                                                                                                                                                                                                                                                                      | PROVIDE & COUNSEL.....1<br>COUNSEL, NOT PROVIDE.....2<br>KNOW LITTLE ABOUT.....3<br>DO NOT KNOW.....8 } (04)                                                                                                                                                                                                                                                                                         | YES.....1<br>NO.....2 → (04)                                                 | YES.....1<br>NO.....2 → (04)<br>PRESCRIPTION ONLY.....3 → (04)                                                            | DAYS...<br><input type="text"/> <input type="text"/> <input type="text"/><br>CONSTANT PROBLEM...995<br>DON'T KNOW..998          |                                                                                                          |                                                                                                                    |

| <b>Now I would like to ask you some questions about your knowledge and provision of various methods of family planning. If you have provided a particular method before, we are also interested in the availability and quality of the materials required to provide that method.</b> |                                                                                                                                                                                                                                                                                                                                                                                                      |                                                                              |                                                                                                                           |                                                                                                                                 |                                                                                                          |                                                                                                                    |
|---------------------------------------------------------------------------------------------------------------------------------------------------------------------------------------------------------------------------------------------------------------------------------------|------------------------------------------------------------------------------------------------------------------------------------------------------------------------------------------------------------------------------------------------------------------------------------------------------------------------------------------------------------------------------------------------------|------------------------------------------------------------------------------|---------------------------------------------------------------------------------------------------------------------------|---------------------------------------------------------------------------------------------------------------------------------|----------------------------------------------------------------------------------------------------------|--------------------------------------------------------------------------------------------------------------------|
| METHOD                                                                                                                                                                                                                                                                                | 29a. Can you please tell me which of the following best describes your knowledge of [METHOD]:<br>1. You know METHOD sufficiently well to counsel and provide/assist in provision to a client;<br>2. You know METHOD sufficiently well to counsel, but not to provide;<br>3. You know little about METHOD and would not feel comfortable counseling or providing;<br>8. You do not know METHOD at all | 29b. Have you provided (assisted with) [METHOD] to clients at this facility? | 29c. Have you experienced any stockouts in this facility that lasted more than 24 hours of [METHOD] in the last one year? | 29d. If yes, how many total days of stockouts did this facility have in the last ONE YEAR of [METHOD] (all stockouts combined)? | 29e. Have you experienced a lack of essential equipment needed to provide [METHOD] in the last ONE YEAR? | 29f. If Yes, how many total days did you lack essential equipment needed to provide [METHOD] in the last ONE YEAR? |
| (04) Male condom                                                                                                                                                                                                                                                                      | PROVIDE & COUNSEL.....1<br>COUNSEL, NOT PROVIDE.....2<br>KNOW LITTLE ABOUT.....3 } (05)<br>DO NOT KNOW.....8                                                                                                                                                                                                                                                                                         | YES.....1<br>NO.....2 → (05)                                                 | YES.....1<br>NO.....2 → (05)<br>PRESCRIPTION ONLY.....3 → (05)                                                            | DAYS...<br><input type="text"/> <input type="text"/> <input type="text"/><br>CONSTANT PROBLEM...995<br>DON'T KNOW..998          |                                                                                                          |                                                                                                                    |
| (05) Female condom                                                                                                                                                                                                                                                                    | PROVIDE & COUNSEL.....1<br>COUNSEL, NOT PROVIDE.....2<br>KNOW LITTLE ABOUT.....3 } (06)<br>DO NOT KNOW.....8                                                                                                                                                                                                                                                                                         | YES.....1<br>NO.....2 → (06)                                                 | YES.....1<br>NO.....2 → (06)<br>PRESCRIPTION ONLY.....3 → (06)                                                            | DAYS...<br><input type="text"/> <input type="text"/> <input type="text"/><br>CONSTANT PROBLEM...995<br>DON'T KNOW..998          |                                                                                                          |                                                                                                                    |
| (06) Emergency contraception                                                                                                                                                                                                                                                          | PROVIDE & COUNSEL.....1<br>COUNSEL, NOT PROVIDE.....2<br>KNOW LITTLE ABOUT.....3 } (07)<br>DO NOT KNOW.....8                                                                                                                                                                                                                                                                                         | YES.....1<br>NO.....2 → (07)                                                 | YES.....1<br>NO.....2 → (07)<br>PRESCRIPTION ONLY.....3 → (07)                                                            | DAYS...<br><input type="text"/> <input type="text"/> <input type="text"/><br>CONSTANT PROBLEM...995<br>DON'T KNOW..998          |                                                                                                          |                                                                                                                    |

| <b>Now I would like to ask you some questions about your knowledge and provision of various methods of family planning. If you have provided a particular method before, we are also interested in the availability and quality of the materials required to provide that method.</b> |                                                                                                                                                                                                                                                                                                                                                                                                      |                                                                              |                                                                                                                           |                                                                                                                                 |                                                                                                          |                                                                                                                    |
|---------------------------------------------------------------------------------------------------------------------------------------------------------------------------------------------------------------------------------------------------------------------------------------|------------------------------------------------------------------------------------------------------------------------------------------------------------------------------------------------------------------------------------------------------------------------------------------------------------------------------------------------------------------------------------------------------|------------------------------------------------------------------------------|---------------------------------------------------------------------------------------------------------------------------|---------------------------------------------------------------------------------------------------------------------------------|----------------------------------------------------------------------------------------------------------|--------------------------------------------------------------------------------------------------------------------|
| METHOD                                                                                                                                                                                                                                                                                | 29a. Can you please tell me which of the following best describes your knowledge of [METHOD]:<br>1. You know METHOD sufficiently well to counsel and provide/assist in provision to a client;<br>2. You know METHOD sufficiently well to counsel, but not to provide;<br>3. You know little about METHOD and would not feel comfortable counseling or providing;<br>8. You do not know METHOD at all | 29b. Have you provided (assisted with) [METHOD] to clients at this facility? | 29c. Have you experienced any stockouts in this facility that lasted more than 24 hours of [METHOD] in the last one year? | 29d. If yes, how many total days of stockouts did this facility have in the last ONE YEAR of [METHOD] (all stockouts combined)? | 29e. Have you experienced a lack of essential equipment needed to provide [METHOD] in the last ONE YEAR? | 29f. If Yes, how many total days did you lack essential equipment needed to provide [METHOD] in the last ONE YEAR? |
| (07)<br>Spermicide                                                                                                                                                                                                                                                                    | PROVIDE & COUNSEL.....1<br>COUNSEL, NOT PROVIDE.....2<br>KNOW LITTLE ABOUT.....3 } (08)<br>DO NOT KNOW.....8                                                                                                                                                                                                                                                                                         | YES.....1<br>NO.....2 → (08)                                                 | YES.....1<br>NO.....2 → (08)<br>PRESCRIPTION ONLY.....3 → (08)                                                            | DAYS...<br><input type="text"/> <input type="text"/> <input type="text"/><br>CONSTANT PROBLEM...995<br>DON'T KNOW..998          |                                                                                                          |                                                                                                                    |
| (08)<br>Diaphragm                                                                                                                                                                                                                                                                     | PROVIDE & COUNSEL.....1<br>COUNSEL, NOT PROVIDE.....2<br>KNOW LITTLE ABOUT.....3 } (09)<br>DO NOT KNOW.....8                                                                                                                                                                                                                                                                                         | YES.....1<br>NO.....2 → (09)                                                 | YES.....1<br>NO.....2 → (09)<br>PRESCRIPTION ONLY.....3 → (09)                                                            | DAYS...<br><input type="text"/> <input type="text"/> <input type="text"/><br>CONSTANT PROBLEM...995<br>DON'T KNOW..998          |                                                                                                          |                                                                                                                    |
| (09)<br>SDM/Cycle beads                                                                                                                                                                                                                                                               | PROVIDE & COUNSEL.....1<br>COUNSEL, NOT PROVIDE.....2<br>KNOW LITTLE ABOUT.....3 } (10)<br>DO NOT KNOW.....8                                                                                                                                                                                                                                                                                         | YES.....1<br>NO.....2 → (10)                                                 | YES.....1<br>NO.....2 → (10)<br>PRESCRIPTION ONLY.....3 → (10)                                                            | DAYS...<br><input type="text"/> <input type="text"/> <input type="text"/><br>CONSTANT PROBLEM...995<br>DON'T KNOW..998          |                                                                                                          |                                                                                                                    |



| <b>Now I would like to ask you some questions about your knowledge and provision of various methods of family planning. If you have provided a particular method before, we are also interested in the availability and quality of the materials required to provide that method.</b> |                                                                                                                                                                                                                                                                                                                                                                                                      |                                                                              |                                                                                                                           |                                                                                                                                 |                                                                                                          |                                                                                                                    |
|---------------------------------------------------------------------------------------------------------------------------------------------------------------------------------------------------------------------------------------------------------------------------------------|------------------------------------------------------------------------------------------------------------------------------------------------------------------------------------------------------------------------------------------------------------------------------------------------------------------------------------------------------------------------------------------------------|------------------------------------------------------------------------------|---------------------------------------------------------------------------------------------------------------------------|---------------------------------------------------------------------------------------------------------------------------------|----------------------------------------------------------------------------------------------------------|--------------------------------------------------------------------------------------------------------------------|
| METHOD                                                                                                                                                                                                                                                                                | 29a. Can you please tell me which of the following best describes your knowledge of [METHOD]:<br>1. You know METHOD sufficiently well to counsel and provide/assist in provision to a client;<br>2. You know METHOD sufficiently well to counsel, but not to provide;<br>3. You know little about METHOD and would not feel comfortable counseling or providing;<br>8. You do not know METHOD at all | 29b. Have you provided (assisted with) [METHOD] to clients at this facility? | 29c. Have you experienced any stockouts in this facility that lasted more than 24 hours of [METHOD] in the last one year? | 29d. If yes, how many total days of stockouts did this facility have in the last ONE YEAR of [METHOD] (all stockouts combined)? | 29e. Have you experienced a lack of essential equipment needed to provide [METHOD] in the last ONE YEAR? | 29f. If Yes, how many total days did you lack essential equipment needed to provide [METHOD] in the last ONE YEAR? |
| (10) IUD                                                                                                                                                                                                                                                                              | PROVIDE & COUNSEL.....1<br>COUNSEL, NOT PROVIDE.....2<br>KNOW LITTLE ABOUT.....3<br>DO NOT KNOW.....8 } (11)                                                                                                                                                                                                                                                                                         | YES.....1<br>NO.....2 → (11)                                                 | YES.....1<br>NO.....2 → (29e)<br>PRESCRIPTION ONLY.....3 → (11)                                                           | DAYS...<br><input type="text"/> <input type="text"/> <input type="text"/><br>CONSTANT PROBLEM...995<br>DON'T KNOW..998          | YES.....1<br>NO.....2 → (11)                                                                             | DAYS...<br><input type="text"/> <input type="text"/> <input type="text"/><br>CONSTANT PROBLEM...995<br>DK.....998  |
| (11) Implants                                                                                                                                                                                                                                                                         | PROVIDE & COUNSEL.....1<br>COUNSEL, NOT PROVIDE.....2<br>KNOW LITTLE ABOUT.....3<br>DO NOT KNOW.....8 } (12)                                                                                                                                                                                                                                                                                         | YES.....1<br>NO.....2 → (12)                                                 | YES.....1<br>NO.....2 → (29e)<br>PRESCRIPTION ONLY.....3 → (12)                                                           | DAYS...<br><input type="text"/> <input type="text"/> <input type="text"/><br>CONSTANT PROBLEM...995<br>DON'T KNOW..998          | YES.....1<br>NO.....2 → (12)                                                                             | DAYS...<br><input type="text"/> <input type="text"/> <input type="text"/><br>CONSTANT PROBLEM...995<br>DK.....998  |
| (12) Female sterilization                                                                                                                                                                                                                                                             | PROVIDE & COUNSEL.....1<br>COUNSEL, NOT PROVIDE.....2<br>KNOW LITTLE ABOUT.....3<br>DO NOT KNOW.....8 } (13)                                                                                                                                                                                                                                                                                         | YES.....1<br>NO.....2 → (13)                                                 |                                                                                                                           |                                                                                                                                 | YES.....1<br>NO.....2 → (13)                                                                             | DAYS...<br><input type="text"/> <input type="text"/> <input type="text"/><br>CONSTANT PROBLEM...995<br>DK.....998  |
| (13) Male sterilization                                                                                                                                                                                                                                                               | PROVIDE & COUNSEL.....1<br>COUNSEL, NOT PROVIDE.....2<br>KNOW LITTLE ABOUT.....3<br>DO NOT KNOW.....8 } (14)                                                                                                                                                                                                                                                                                         | YES.....1<br>NO.....2 → (14)                                                 |                                                                                                                           |                                                                                                                                 | YES.....1<br>NO.....2 → (14)                                                                             | DAYS...<br><input type="text"/> <input type="text"/> <input type="text"/><br>CONSTANT PROBLEM...995<br>DK.....998  |

|                                                                |                                                                                                                                                                                                                                                                                                |                                                                      |
|----------------------------------------------------------------|------------------------------------------------------------------------------------------------------------------------------------------------------------------------------------------------------------------------------------------------------------------------------------------------|----------------------------------------------------------------------|
|                                                                | 29a. Can you please tell me which of the following best describes your knowledge of [METHOD]:<br>1. Know the method sufficiently well to counsel and recommend to client<br>2. Know little about the method and would not feel comfortable counseling or recommending<br>8. Do not know method | 29b. Have you ever recommended [METHOD] to clients at this facility? |
| (14) Natural methods (Rhythm, periodic abstinence, withdrawal) | COUNSEL & RECOMMEND.....1<br>KNOW LITTLE ABOUT.....2<br>DO NOT KNOW.....8 } → (15)                                                                                                                                                                                                             | Yes.....1<br>No.....2                                                |
| (15) Exclusive breastfeeding method (LAM)                      | COUNSEL & RECOMMEND.....1<br>KNOW LITTLE ABOUT.....2<br>DO NOT KNOW.....8 } → Q30                                                                                                                                                                                                              | Yes.....1<br>No.....2                                                |

**Q30. CHECK Q29A:**

PROVIDES AND/OR COUNSELS ANY FP METHOD (ANY Q29A(1-13) = 1 OR 2; Q29A(14-15)=1)  →

DOES NOT PROVIDE AND DOES NOT COUNSEL ANY FP METHOD (ALL Q29A(1-13) = 3 OR 8 AND Q29A(14-15)= 2 OR 8)  → **Q36**

**Now I would like to ask you specifically about the contraceptive methods that you provide. (ASK ONLY ABOUT THE FAMILY PLANNING METHODS THE RESPONDENT IS PROVIDING – Q29b)**

| METHOD                      | Q31a. What is the minimum age that you would offer this [METHOD]?       | Q31b. What is the maximum age that you would offer this [METHOD]?       | Q31c. Is there a minimum number of children a person must have before you will offer [METHOD]? | Q31d. What is that minimum number of children? | Q31e. Do you require a partner's consent before you will provide [METHOD]? | Q31f. Would you offer METHOD to an unmarried person? |
|-----------------------------|-------------------------------------------------------------------------|-------------------------------------------------------------------------|------------------------------------------------------------------------------------------------|------------------------------------------------|----------------------------------------------------------------------------|------------------------------------------------------|
| (1) Combined oral pills     | <input type="text"/> <input type="text"/><br>NO MIN.....93<br>DK.....98 | <input type="text"/> <input type="text"/><br>NO MAX.....93<br>DK.....98 | YES ... 1<br>NO ... 2 → Q31e<br>DK.....8 → Q31e                                                | <input type="text"/> <input type="text"/>      | YES ... 1<br>NO ... 2                                                      | YES ... 1<br>NO ... 2                                |
| (2) Progestin-only pill     | <input type="text"/> <input type="text"/><br>NO MIN.....93<br>DK.....98 | <input type="text"/> <input type="text"/><br>NO MAX.....93<br>DK.....98 | YES ... 1<br>NO ... 2 → Q31e<br>DK.....8 → Q31e                                                | <input type="text"/> <input type="text"/>      | YES ... 1<br>NO ... 2                                                      | YES ... 1<br>NO ... 2                                |
| (3) Injectables             | <input type="text"/> <input type="text"/><br>NO MIN.....93<br>DK.....98 | <input type="text"/> <input type="text"/><br>NO MAX.....93<br>DK.....98 | YES ... 1<br>NO ... 2 → Q31e<br>DK.....8 → Q31e                                                | <input type="text"/> <input type="text"/>      | YES ... 1<br>NO ... 2                                                      | YES ... 1<br>NO ... 2                                |
| (4) Male condom             | <input type="text"/> <input type="text"/><br>NO MIN.....93<br>DK.....98 | <input type="text"/> <input type="text"/><br>NO MAX.....93<br>DK.....98 | YES ... 1<br>NO ... 2 → Q31e<br>DK.....8 → Q31e                                                | <input type="text"/> <input type="text"/>      | YES ... 1<br>NO ... 2                                                      | YES ... 1<br>NO ... 2                                |
| (5) Female condom           | <input type="text"/> <input type="text"/><br>NO MIN.....93<br>DK.....98 | <input type="text"/> <input type="text"/><br>NO MAX.....93<br>DK.....98 | YES ... 1<br>NO ... 2 → Q31e<br>DK.....8 → Q31e                                                | <input type="text"/> <input type="text"/>      | YES ... 1<br>NO ... 2                                                      | YES ... 1<br>NO ... 2                                |
| (6) Emergency contraceptive | <input type="text"/> <input type="text"/><br>NO MIN.....93<br>DK.....98 | <input type="text"/> <input type="text"/><br>NO MAX.....93<br>DK.....98 | YES ... 1<br>NO ... 2 → Q31e<br>DK.....8 → Q31e                                                | <input type="text"/> <input type="text"/>      | YES ... 1<br>NO ... 2                                                      | YES ... 1<br>NO ... 2                                |
| (7) Spermicide              | <input type="text"/> <input type="text"/><br>NO MIN.....93<br>DK.....98 | <input type="text"/> <input type="text"/><br>NO MAX.....93<br>DK.....98 | YES ... 1<br>NO ... 2 → Q31e<br>DK.....8 → Q31e                                                | <input type="text"/> <input type="text"/>      | YES ... 1<br>NO ... 2                                                      | YES ... 1<br>NO ... 2                                |

|                           |                                                        |                                                        |                                                 |                          |                       |                       |
|---------------------------|--------------------------------------------------------|--------------------------------------------------------|-------------------------------------------------|--------------------------|-----------------------|-----------------------|
| (8) Diaphragm             | <input type="checkbox"/><br>NO MIN.....93<br>DK.....98 | <input type="checkbox"/><br>NO MAX.....93<br>DK.....98 | YES ... 1<br>NO ... 2 → Q30e<br>DK.....8 → Q30e | <input type="checkbox"/> | YES ... 1<br>NO ... 2 | YES ... 1<br>NO ... 2 |
| (9) SDM/Cycle beads       | <input type="checkbox"/><br>NO MIN.....93<br>DK.....98 | <input type="checkbox"/><br>NO MAX.....93<br>DK.....98 | YES ... 1<br>NO ... 2 → Q31e<br>DK.....8 → Q31e | <input type="checkbox"/> | YES ... 1<br>NO ... 2 | YES ... 1<br>NO ... 2 |
| (10) IUD                  | <input type="checkbox"/><br>NO MIN.....93<br>DK.....98 | <input type="checkbox"/><br>NO MAX.....93<br>DK.....98 | YES ... 1<br>NO ... 2 → Q31e<br>DK.....8 → Q31e | <input type="checkbox"/> | YES ... 1<br>NO ... 2 | YES ... 1<br>NO ... 2 |
| (11) Implants             | <input type="checkbox"/><br>NO MIN.....93<br>DK.....98 | <input type="checkbox"/><br>NO MAX...93<br>DK.....98   | YES ... 1<br>NO ... 2 → Q31e<br>DK.....8 → Q31e | <input type="checkbox"/> | YES ... 1<br>NO ... 2 | YES ... 1<br>NO ... 2 |
| (12) Female sterilization | <input type="checkbox"/><br>NO MIN.....93<br>DK.....98 | <input type="checkbox"/><br>NO MAX...93<br>DK.....98   | YES ... 1<br>NO ... 2 → Q31e<br>DK.....8 → Q31e | <input type="checkbox"/> | YES ... 1<br>NO ... 2 | YES ... 1<br>NO ... 2 |
| (13) Male sterilization   | <input type="checkbox"/><br>NO MIN....93<br>DK.....98  | <input type="checkbox"/><br>NO MAX...93<br>DK.....98   | YES ... 1<br>NO ... 2 → Q31e<br>DK.....8 → Q31e | <input type="checkbox"/> | YES ... 1<br>NO ... 2 | YES ... 1<br>NO ... 2 |

|      |                                                                                                                                                                                  |                                                                                                                                                                                                                                                                                                                                                                                                                                                                                                                                                                                         |
|------|----------------------------------------------------------------------------------------------------------------------------------------------------------------------------------|-----------------------------------------------------------------------------------------------------------------------------------------------------------------------------------------------------------------------------------------------------------------------------------------------------------------------------------------------------------------------------------------------------------------------------------------------------------------------------------------------------------------------------------------------------------------------------------------|
| Q32. | <p>What do you do/tell the client when talking about FP to clients?</p> <p>PROBE – Anything else?<br/> <b>MULTIPLE RESPONSES POSSIBLE.</b><br/> <b>CIRCLE ALL MENTIONED.</b></p> | <p>IDENTIFY REPRODUCTIVE GOALS OF CLIENT.....A<br/>                 PROVIDE INFORMATION ABOUT DIFFERENT FP METHODS.....B<br/>                 DISCUSS THE CLIENT'S FP PREFERENCES.....C<br/>                 HELP CLIENT SELECT A SUITABLE METHOD.....D<br/>                 EXPLAIN THE WAY TO USE THE SELECTED METHOD.....E<br/>                 EXPLAIN THE SIDE-EFFECTS.....F<br/>                 EXPLAIN SPECIFIC MEDICAL REASONS TO RETURN.....G<br/>                 REQUEST FOR PARTNER'S CONSENT.....H<br/>                 OTHERS _____ X<br/>                 (SPECIFY)</p> |
|------|----------------------------------------------------------------------------------------------------------------------------------------------------------------------------------|-----------------------------------------------------------------------------------------------------------------------------------------------------------------------------------------------------------------------------------------------------------------------------------------------------------------------------------------------------------------------------------------------------------------------------------------------------------------------------------------------------------------------------------------------------------------------------------------|

|      |                                                                                                                                                                                                       |                                                                                                                                                                        |
|------|-------------------------------------------------------------------------------------------------------------------------------------------------------------------------------------------------------|------------------------------------------------------------------------------------------------------------------------------------------------------------------------|
| Q33. | <p><b>CHECK Q29B:</b></p> <p>PROVIDES HORMONAL METHODS (PILL OF ANY TYPE, INJECTABLE, IUD, OR IMPLANTS: Q29B(1)=1 OR Q29B(2)=1 OR Q29B(3)=1 OR Q29B(10)=1 OR Q29B(11)=1) <input type="checkbox"/></p> | <p>DOES NOT PROVIDE HORMONAL METHODS (ALL OF THE FOLLOWING EQUAL "2" OR ARE SKIPPED: Q29B(1), Q29B(2), Q29B(3), Q29B(10), Q29B(11)) <input type="checkbox"/> → Q35</p> |
|------|-------------------------------------------------------------------------------------------------------------------------------------------------------------------------------------------------------|------------------------------------------------------------------------------------------------------------------------------------------------------------------------|

|      |                                                                                                                                                                                                                                                                      |                                                                                                                                                                                                                                                                                                                                                                                                                                                                                                                                                                                                                                                                                                                        |
|------|----------------------------------------------------------------------------------------------------------------------------------------------------------------------------------------------------------------------------------------------------------------------|------------------------------------------------------------------------------------------------------------------------------------------------------------------------------------------------------------------------------------------------------------------------------------------------------------------------------------------------------------------------------------------------------------------------------------------------------------------------------------------------------------------------------------------------------------------------------------------------------------------------------------------------------------------------------------------------------------------------|
| Q34. | <p>What do you do for a new client who wants the pill or another hormonal method but is not having her menses?</p> <p><b>DO NOT READ OPTIONS</b></p> <p>PROBE WITH "Anything else?"</p> <p><b>MULTIPLE RESPONSES POSSIBLE.</b><br/> <b>CIRCLE ALL MENTIONED.</b></p> | <p>QUESTION TO EXCLUDE PREGNANCY.....A<br/>                 EXAMINE TO EXCLUDE PREGNANCY.....B<br/>                 TEST TO EXCLUDE PREGNANCY.....C<br/>                 TELL HER TO COME BACK AT NEXT MENSES....D<br/>                 TRY TO INDUCE MENSES.....E<br/>                 SUPPLY CONDOMS UNTIL NEXT MENSES.....F<br/>                 SUPPLY HORMONAL METHOD IF REASONABLY CERTAIN SHE IS NOT PREGNANT.....G<br/>                 SUPPLY HORMONAL METHOD AND CONDOMS, ASK HER TO USE CONDOMS UNTIL NEXT MENSES.....H<br/>                 JUST GIVE HORMONAL METHOD.....J<br/>                 REQUEST FOR PARTNER'S CONSENT.....K<br/>                 OTHER _____ X<br/>                 (SPECIFY)</p> |
|------|----------------------------------------------------------------------------------------------------------------------------------------------------------------------------------------------------------------------------------------------------------------------|------------------------------------------------------------------------------------------------------------------------------------------------------------------------------------------------------------------------------------------------------------------------------------------------------------------------------------------------------------------------------------------------------------------------------------------------------------------------------------------------------------------------------------------------------------------------------------------------------------------------------------------------------------------------------------------------------------------------|

|      |                                                                                                                                                                                                                  |                                                                                                                                                                                                                                                                        |  |
|------|------------------------------------------------------------------------------------------------------------------------------------------------------------------------------------------------------------------|------------------------------------------------------------------------------------------------------------------------------------------------------------------------------------------------------------------------------------------------------------------------|--|
| Q35. | Which kind of personal and financial records do you complete each time you provide a client with family planning services?<br><br><b>MULTIPLE RESPONSES POSSIBLE.<br/>                 CIRCLE ALL MENTIONED.</b> | A CLIENT RECORD CARD/FORM.....A<br>AN ENTRY IN THE FP REGISTER.....B<br>AN ENTRY IN THE FACILITY LOGBOOK/<br>REGISTER.....C<br>INFORMAL NOTES IN A NOTEBOOK.....D<br>A PAYMENT RECEIPT IF A FEE IS INVOLVED.....E<br>OTHER _____X<br>(SPECIFY)<br>NO RECORD KEPT.....Y |  |
|------|------------------------------------------------------------------------------------------------------------------------------------------------------------------------------------------------------------------|------------------------------------------------------------------------------------------------------------------------------------------------------------------------------------------------------------------------------------------------------------------------|--|

**INTEGRATION OF FAMILY PLANNING WITH OTHER SERVICES**

|      |                                                                                                                                                                                                    |                                                                                                                                                                                                                                                                                                                                               |     |
|------|----------------------------------------------------------------------------------------------------------------------------------------------------------------------------------------------------|-----------------------------------------------------------------------------------------------------------------------------------------------------------------------------------------------------------------------------------------------------------------------------------------------------------------------------------------------|-----|
| Q36. | Which are the other services that you yourself provide to clients at this health facility? READ THE OPTIONS.<br><br><b>MULTIPLE RESPONSES POSSIBLE.<br/>                 CIRCLE ALL MENTIONED.</b> | ANTE-NATAL CARE.....A<br>DELIVERY SERVICES.....B<br>POST-NATAL CARE.....C<br>POST-ABORTION CARE.....D<br>CHILD IMMUNIZATION.....E<br>CHILD GROWTH MONITORING.....F<br>OTHER CURATIVE SERVICES FOR WOMEN.....G<br>OTHER CURATIVE SERVICES FOR CHILDREN.....H<br>HIV/AIDS MANAGEMENT.....I<br>PMTCT.....J<br>VCT.....K<br>NONE OF THESE.....Y → | Q89 |
|------|----------------------------------------------------------------------------------------------------------------------------------------------------------------------------------------------------|-----------------------------------------------------------------------------------------------------------------------------------------------------------------------------------------------------------------------------------------------------------------------------------------------------------------------------------------------|-----|

|      |                                                                                                                                                                           |  |     |
|------|---------------------------------------------------------------------------------------------------------------------------------------------------------------------------|--|-----|
| Q37. | <b>CHECK Q36:</b><br><br>IF OPTION A (ANTENATAL CARE) IS CIRCLED <input type="checkbox"/> → IF OPTION A (ANTENATAL CARE) IS <b>NOT</b> CIRCLED <input type="checkbox"/> → |  | Q46 |
|------|---------------------------------------------------------------------------------------------------------------------------------------------------------------------------|--|-----|

|      |                                                                       |                         |     |
|------|-----------------------------------------------------------------------|-------------------------|-----|
| Q38. | During Antenatal care, do you provide information about FP routinely? | YES.....1<br>NO.....2 → | Q44 |
|------|-----------------------------------------------------------------------|-------------------------|-----|

|      |                                                                                                                                                                                              |                                                                                                                                                                                                                                                                                                                                                                                      |     |
|------|----------------------------------------------------------------------------------------------------------------------------------------------------------------------------------------------|--------------------------------------------------------------------------------------------------------------------------------------------------------------------------------------------------------------------------------------------------------------------------------------------------------------------------------------------------------------------------------------|-----|
| Q39. | What do you do/tell the client when talking about FP during antenatal care?<br><br>PROBE: "ANYTHING ELSE?"<br><b>MULTIPLE RESPONSES POSSIBLE.<br/>                 CIRCLE ALL MENTIONED.</b> | HELP THE WOMAN SELECT A SUITABLE METHOD FOR POST-DELIVERY.....A<br>INFORM ABOUT THE IMPORTANCE OF USING FP BY 40 DAYS POSTPARTUM.....B<br>PROVIDE INFORMATION ON LAM.....C<br>EXPLAIN SIDE-EFFECTS.....D<br>ENCOURAGE WOMEN TO WAIT FOR SOME TIME BEFORE THE NEXT PREGNANCY.....E<br>REQUEST FOR PARTNER'S CONSENT.....F<br>OTHERS: _____X<br>(SPECIFY)                              |     |
| Q40. | Do you tell women where they can obtain an FP method after delivery?                                                                                                                         | YES.....1<br>NO.....2                                                                                                                                                                                                                                                                                                                                                                |     |
| Q41. | Do you use counseling job aids to provide FP services during antenatal care?                                                                                                                 | YES.....1<br>NO.....2 →                                                                                                                                                                                                                                                                                                                                                              | Q46 |
| Q42. | Which job aids do you use?<br><br>PROBE: "ANYTHING ELSE?"<br><b>MULTIPLE RESPONSES POSSIBLE.<br/>                 CIRCLE ALL MENTIONED.</b>                                                  | NATIONAL STANDARD OF PRACTICE (SOP) FOR FP SERVICES .....A<br>FMOH FP SERVICES PERFORMANCE STANDARDS.....B<br>WHO MEDICAL ELIGIBILITY CRITERIA (MERC).....C<br>NURHI FP COUNSELING FLIP CHARTS.....D<br>GATHER CHART.....E<br>FP METHOD CHART (WALL TYPE) .....F<br>NURHI SMS FP COMMODITY TRACKING JOB AID .....G<br>OJT MANUALS (THREE COURSES).....H<br>OTHER _____X<br>(SPECIFY) |     |

|                                                                                                                                                                                       |                                                                                                                                                                                             |                                                                                                                                                                                                                                                                                                                                                                                                                                                                                                                                                                                                           |                        |
|---------------------------------------------------------------------------------------------------------------------------------------------------------------------------------------|---------------------------------------------------------------------------------------------------------------------------------------------------------------------------------------------|-----------------------------------------------------------------------------------------------------------------------------------------------------------------------------------------------------------------------------------------------------------------------------------------------------------------------------------------------------------------------------------------------------------------------------------------------------------------------------------------------------------------------------------------------------------------------------------------------------------|------------------------|
| Q43.                                                                                                                                                                                  | Who provided these job aids?<br><br><b>MULTIPLE RESPONSES POSSIBLE.<br/>                 CIRCLE ALL MENTIONED.</b>                                                                          | NURHI/FPPN .....A<br>UNFPA .....B<br>WHO .....C<br>SFH .....D<br>JHPIEGO .....E<br>MARIE STOPES .....F<br>PATH .....G<br>PPFN .....H<br>STATE/ MOH .....I<br>MCHIP .....J<br>TSHIP .....K<br>UNICEF .....L<br>OTHER _____ X<br><br>DON" T KNOW .....Z                                                                                                                                                                                                                                                                                                                                                     | ALLL<br>SKIP TO<br>Q46 |
| Q44.                                                                                                                                                                                  | Why are you not able to provide FP information routinely during antenatal care visits?<br><br><b>MULTIPLE RESPONSES POSSIBLE.<br/>                 CIRCLE ALL MENTIONED.</b>                | ADEQUATE CONTRACEPTIVE METHODS FREQUENTLY UNAVAILABLE.....A<br>AVAILABLE CONTRACEPTIVES OFTEN PAST EXPIRATION DATE.....B<br>LACK OF STERILE EQUIPMENT SO NO POINT DISCUSSING.....C<br>LACK OF FUNCTIONAL EQUIPMENT SO NO POINT DISCUSSING.....D<br>NO INTEREST IN PROVIDING FP INFORMATION.....E<br>LACK KNOWLEDGE ABOUT FP.....F<br>DO NOT FEEL ADEQUATELY TRAINED TO PROVIDE FP INFORMATION.....G<br>NO INTEREST IN FP ON THE PART OF THE PATIENTS...H<br>OVERLOAD OF WORK/NO TIME TO DISCUSS.....I<br>NO NEED TO.....K<br>NOT A PROFITABLE SERVICE TO PROVIDE.....L<br><br>OTHERS _____ X<br>(SPECIFY) |                        |
| Q45.                                                                                                                                                                                  | Would you be willing to include family planning information routinely in your antenatal care services/visits?                                                                               | YES.....1<br>NO.....2                                                                                                                                                                                                                                                                                                                                                                                                                                                                                                                                                                                     |                        |
| <b>Q46. CHECK Q36:</b><br><br>IF OPTION B (DELIVERY CARE) IS CIRCLED <input type="checkbox"/> IF OPTION B (DELIVERY CARE) IS <b>NOT</b> CIRCLED <input type="checkbox"/> → <b>Q53</b> |                                                                                                                                                                                             |                                                                                                                                                                                                                                                                                                                                                                                                                                                                                                                                                                                                           |                        |
| Q47.                                                                                                                                                                                  | During <u>delivery care</u> (anytime before they are discharged from your facility), do you provide information about FP routinely?                                                         | YES.....1<br>NO.....2 → <b>Q51</b>                                                                                                                                                                                                                                                                                                                                                                                                                                                                                                                                                                        |                        |
| Q48.                                                                                                                                                                                  | What do you do/tell the client when talking about FP during delivery care?<br><br>PROBE: "ANYTHING ELSE?"<br><b>MULTIPLE RESPONSES POSSIBLE.<br/>                 CIRCLE ALL MENTIONED.</b> | HELP SELECT SUITABLE FP METHOD BY 40 DAYS POSTPARTUM.....A<br>PROVIDE INFORMATION ON LAM.....B<br>EXPLAIN SIDE-EFFECTS.....C<br>EXPLAIN SPECIFIC MEDICAL REASONS TO RETURN.....D<br>ENCOURAGE WOMEN TO WAIT SOME TIME BEFORE THE NEXT PREGNANCY.....E<br>REQUEST FOR PARTNER'S CONSENT.....F<br>OTHER _____ X<br>(SPECIFY)                                                                                                                                                                                                                                                                                |                        |
| Q49.                                                                                                                                                                                  | Do you tell women where they can obtain an FP method during delivery care?                                                                                                                  | YES.....1<br>NO.....2                                                                                                                                                                                                                                                                                                                                                                                                                                                                                                                                                                                     |                        |
| Q50.                                                                                                                                                                                  | Do you counsel women on LAM during delivery care?                                                                                                                                           | YES.....1<br>NO.....2 } → <b>All skip to Q53</b>                                                                                                                                                                                                                                                                                                                                                                                                                                                                                                                                                          |                        |

|                                                                                                                                                                                       |                                                                                                                                                                                           |                                                                                                                                                                                                                                                                                                                                                                                                                                                                                                                                                                                                          |                            |
|---------------------------------------------------------------------------------------------------------------------------------------------------------------------------------------|-------------------------------------------------------------------------------------------------------------------------------------------------------------------------------------------|----------------------------------------------------------------------------------------------------------------------------------------------------------------------------------------------------------------------------------------------------------------------------------------------------------------------------------------------------------------------------------------------------------------------------------------------------------------------------------------------------------------------------------------------------------------------------------------------------------|----------------------------|
| Q51.                                                                                                                                                                                  | Why are you not able to provide FP information routinely during delivery care?<br><br>PROBE: "ANYTHING ELSE?"<br><b>MULTIPLE RESPONSES POSSIBLE.</b><br><b>CIRCLE ALL MENTIONED.</b>      | ADEQUATE CONTRACEPTIVE METHODS FREQUENTLY UNAVAILABLE.....A<br>AVAILABLE CONTRACEPTIVES OFTEN PAST EXPIRATION DATE.....B<br>LACK OF STERILE EQUIPMENT SO NO POINT DISCUSSING.....C<br>LACK OF FUNCTIONAL EQUIPMENT SO NO POINT DISCUSSING.....D<br>NO INTEREST IN PROVIDING FP INFORMATION.....E<br>LACK KNOWLEDGE ABOUT FP.....F<br>DO NOT FEEL ADEQUATELY TRAINED TO PROVIDE FP INFORMATION.....G<br>NO INTEREST IN FP ON THE PART OF THE PATIENTS...H<br>OVERLOAD OF WORK/NO TIME TO DISCUSS.....I<br>NO NEED TO.....K<br>NOT A PROFITABLE SERVICE TO PROVIDE.....L<br><br>OTHERS _____X<br>(SPECIFY) |                            |
| Q52.                                                                                                                                                                                  | Would you be willing to include family planning information routinely in your delivery care services?                                                                                     | YES.....1<br>NO.....2                                                                                                                                                                                                                                                                                                                                                                                                                                                                                                                                                                                    |                            |
| <b>Q53. CHECK Q36:</b><br>IF OPTION C (POST-NATAL CARE) IS CIRCLED <input type="checkbox"/> IF OPTION C (POST-NATAL CARE) IS <u>NOT</u> CIRCLED <input type="checkbox"/> → <b>Q62</b> |                                                                                                                                                                                           |                                                                                                                                                                                                                                                                                                                                                                                                                                                                                                                                                                                                          |                            |
| Q54.                                                                                                                                                                                  | During <u>post-natal care</u> visits, do you provide information about FP routinely?                                                                                                      | YES.....1<br>NO.....2 → <b>Q60</b>                                                                                                                                                                                                                                                                                                                                                                                                                                                                                                                                                                       |                            |
| Q55.                                                                                                                                                                                  | What do you do/tell the client when talking about FP during post-natal care visits?<br><br>PROBE: "ANYTHING ELSE?"<br><b>MULTIPLE RESPONSES POSSIBLE.</b><br><b>CIRCLE ALL MENTIONED.</b> | HELP SELECT SUITABLE FP METHOD BY 40 DAYS POSTPARTUM.....A<br>PROVIDE INFORMATION ON LAM.....B<br>EXPLAIN SIDE-EFFECTS.....C<br>EXPLAIN SPECIFIC MEDICAL REASONS TO RETURN.....D<br>ENCOURAGE WOMEN TO WAIT SOME TIME BEFORE THE NEXT PREGNANCY.....E<br>REQUEST FOR PARTNER'S CONSENT.....F<br>OTHER _____X<br>(SPECIFY)                                                                                                                                                                                                                                                                                |                            |
| Q56.                                                                                                                                                                                  | Do you tell women where they can obtain an FP method during post-natal care visits?                                                                                                       | YES.....1<br>NO.....2                                                                                                                                                                                                                                                                                                                                                                                                                                                                                                                                                                                    |                            |
| Q57.                                                                                                                                                                                  | Do you use counseling job aids to provide FP services during postnatal care visits?                                                                                                       | YES.....1<br>NO.....2 → <b>Q62</b>                                                                                                                                                                                                                                                                                                                                                                                                                                                                                                                                                                       |                            |
| Q58.                                                                                                                                                                                  | Which job aids do you use?<br><br>PROBE: "ANYTHING ELSE?"<br><b>MULTIPLE RESPONSES POSSIBLE.</b><br><b>CIRCLE ALL MENTIONED.</b>                                                          | NATIONAL STANDARD OF PRACTICE (SOP) FOR FP SERVICES .....A<br>FMOH FP SERVICES PERFORMANCE STANDARDS.....B<br>WHO MEDICAL ELIGIBILITY CRITERIA (MERC).....C<br>NURHI FP COUNSELING FLIP CHARTS.....D<br>GATHER CHART.....E<br>FP METHOD CHART (WALL TYPE) .....F<br>NURHI SMS FP COMMODITY TRACKING JOB AID .....G<br>OJT MANUALS (THREE COURSES).....H<br>NURHI MOBILE APP/CD.....I<br>OTHER _____X<br>(SPECIFY)                                                                                                                                                                                        |                            |
| Q59.                                                                                                                                                                                  | Who provided these job aids?                                                                                                                                                              | NURHI .....A<br>MOBILE DL SIM .....B<br>TSHIP.....C<br>UNICEF.....D<br>SMOH.....E<br>SFH.....F<br>OTHER _____X<br>(SPECIFY)<br>DON'T KNOW .....Z                                                                                                                                                                                                                                                                                                                                                                                                                                                         | } → <b>ALL SKIP TO Q62</b> |



|                                                                                                                                                                                                                                                                                                   |                                                                                                                                                                                                                      |                                                                                                                                                                                                                                                                                                                                                                                                                                                                                                                                                                                                                               |                            |
|---------------------------------------------------------------------------------------------------------------------------------------------------------------------------------------------------------------------------------------------------------------------------------------------------|----------------------------------------------------------------------------------------------------------------------------------------------------------------------------------------------------------------------|-------------------------------------------------------------------------------------------------------------------------------------------------------------------------------------------------------------------------------------------------------------------------------------------------------------------------------------------------------------------------------------------------------------------------------------------------------------------------------------------------------------------------------------------------------------------------------------------------------------------------------|----------------------------|
| Q68.                                                                                                                                                                                                                                                                                              | Who provided these job aids?                                                                                                                                                                                         | NURHI ..... A<br>MOBILE DL SIM ..... B<br>TSHIP ..... C<br>UNICEF ..... D<br>SMOH ..... E<br>SFH ..... F<br>OTHER ..... X<br>(SPECIFY)<br>DON'T KNOW ..... Z                                                                                                                                                                                                                                                                                                                                                                                                                                                                  | } → <b>ALL SKIP TO Q71</b> |
| Q69.                                                                                                                                                                                                                                                                                              | Why are you not able to provide FP information routinely during post abortion care visits?<br><br>PROBE: "ANYTHING ELSE?"<br><b>MULTIPLE RESPONSES POSSIBLE.</b><br><b>CIRCLE ALL MENTIONED.</b>                     | ADEQUATE CONTRACEPTIVE METHODS FREQUENTLY UNAVAILABLE ..... A<br>AVAILABLE CONTRACEPTIVES OFTEN PAST EXPIRATION DATE ..... B<br>LACK OF STERILE EQUIPMENT SO NO POINT DISCUSSING ..... C<br>LACK OF FUNCTIONAL EQUIPMENT SO NO POINT DISCUSSING ..... D<br>NO INTEREST IN PROVIDING FP INFORMATION ..... E<br>LACK KNOWLEDGE ABOUT FP ..... F<br>DO NOT FEEL ADEQUATELY TRAINED TO PROVIDE FP INFORMATION ..... G<br>NO INTEREST IN FP ON THE PART OF THE PATIENTS ..... H<br>OVERLOAD OF WORK/NO TIME TO DISCUSS ..... I<br>NO NEED TO ..... K<br>NOT A PROFITABLE SERVICE TO PROVIDE ..... L<br>OTHERS ..... X<br>(SPECIFY) |                            |
| Q70.                                                                                                                                                                                                                                                                                              | Would you be willing to include family planning information routinely in your post abortion care services/visits?                                                                                                    | YES ..... 1<br>NO ..... 2                                                                                                                                                                                                                                                                                                                                                                                                                                                                                                                                                                                                     |                            |
| <b>Q71. CHECK Q36:</b><br>IF <b>EITHER</b> OPTION E (CHILD IMMUNIZATION) OR OPTION F (CHILD GROWTH MONITORING) IS CIRCLED <input type="checkbox"/> IF <b>NEITHER</b> OPTION E (CHILD IMMUNIZATION) <b>NOR</b> OPTION F (CHILD GROWTH MONITORING) IS CIRCLED <input type="checkbox"/> → <b>Q77</b> |                                                                                                                                                                                                                      |                                                                                                                                                                                                                                                                                                                                                                                                                                                                                                                                                                                                                               |                            |
| Q72.                                                                                                                                                                                                                                                                                              | During <u>child immunization/child growth monitoring</u> , do you provide information about FP routinely?                                                                                                            | YES ..... 1<br>NO ..... 2                                                                                                                                                                                                                                                                                                                                                                                                                                                                                                                                                                                                     | } → <b>Q75</b>             |
| Q73.                                                                                                                                                                                                                                                                                              | What do you do/tell clients when talking about FP during child immunization or child growth monitoring visits?<br><br>PROBE: "ANYTHING ELSE?"<br><b>MULTIPLE RESPONSES POSSIBLE.</b><br><b>CIRCLE ALL MENTIONED.</b> | IDENTIFY REPRODUCTIVE GOALS OF WOMAN ..... A<br>PROVIDE INFORMATION ABOUT DIFFERENT FP METHODS ..... B<br>DISCUSS THE CLIENT'S FP PREFERENCES ..... C<br>HELP WOMEN SELECT A SUITABLE METHOD ..... D<br>EDUCATE WOMEN TO USE THE SELECTED METHOD ..... E<br>EXPLAIN SIDE-EFFECTS ..... F<br>EXPLAIN SPECIFIC MEDICAL REASONS TO RETURN ..... G<br>REQUEST FOR PARTNER'S CONSENT ..... H<br>OTHERS: ..... X<br>(SPECIFY)                                                                                                                                                                                                       |                            |
| Q74.                                                                                                                                                                                                                                                                                              | Do you tell women where they can obtain an FP method?                                                                                                                                                                | Yes ..... 1<br>No ..... 2                                                                                                                                                                                                                                                                                                                                                                                                                                                                                                                                                                                                     | } → <b>All skip to Q77</b> |



|                                                                                                                                                                                                                                                                                                                                                                                                                                                                                                |                                                                                                                                                                                 |                                                                                                                                                                                                                                                                                                                                                                                                                                                                                                                                                                                                  |  |
|------------------------------------------------------------------------------------------------------------------------------------------------------------------------------------------------------------------------------------------------------------------------------------------------------------------------------------------------------------------------------------------------------------------------------------------------------------------------------------------------|---------------------------------------------------------------------------------------------------------------------------------------------------------------------------------|--------------------------------------------------------------------------------------------------------------------------------------------------------------------------------------------------------------------------------------------------------------------------------------------------------------------------------------------------------------------------------------------------------------------------------------------------------------------------------------------------------------------------------------------------------------------------------------------------|--|
| Q75.                                                                                                                                                                                                                                                                                                                                                                                                                                                                                           | Why are you not able to provide FP information routinely?<br><br>PROBE: "ANYTHING ELSE?"<br><b>MULTIPLE RESPONSES POSSIBLE.</b><br><b>CIRCLE ALL MENTIONED.</b>                 | ADEQUATE CONTRACEPTIVE METHODS FREQUENTLY UNAVAILABLE.....A<br>AVAILABLE CONTRACEPTIVES OFTEN PAST EXPIRATION DATE.....B<br>LACK OF STERILE EQUIPMENT SO NO POINT DISCUSSING.....C<br>LACK OF FUNCTIONAL EQUIPMENT SO NO POINT DISCUSSING.....D<br>NO INTEREST IN PROVIDING FP INFORMATION.....E<br>LACK KNOWLEDGE ABOUT FP.....F<br>DO NOT FEEL ADEQUATELY TRAINED TO PROVIDE FP INFORMATION.....G<br>NO INTEREST IN FP ON THE PART OF THE PATIENTS.....H<br>OVERLOAD OF WORK/NO TIME.....I<br>NO NEED TO.....K<br>NOT A PROFITABLE SERVICE TO PROVIDE.....L<br><br>OTHERS _____ X<br>(SPECIFY) |  |
| Q76.                                                                                                                                                                                                                                                                                                                                                                                                                                                                                           | Would you be willing to include family planning information routinely in your child immunization or child growth monitoring visits?                                             | YES.....1<br>NO.....2                                                                                                                                                                                                                                                                                                                                                                                                                                                                                                                                                                            |  |
| <b>Q77. CHECK Q36:</b><br><br>IF <b>EITHER</b> OPTION G (CURATIVE SERVICES FOR WOMEN) OR H (CURATIVE SERVICES FOR CHILDREN) IS CIRCLED <input type="checkbox"/>  <input type="checkbox"/>  <b>Q83</b><br>IF <b>NEITHER</b> OPTION G (CURATIVE SERVICES FOR WOMEN) <b>NOR</b> H (CURATIVE SERVICES FOR CHILDREN) IS CIRCLED |                                                                                                                                                                                 |                                                                                                                                                                                                                                                                                                                                                                                                                                                                                                                                                                                                  |  |
| Q78.                                                                                                                                                                                                                                                                                                                                                                                                                                                                                           | While providing curative services to women or children, do you provide information on FP routinely?                                                                             | YES.....1<br>NO.....2  <b>Q81</b>                                                                                                                                                                                                                                                                                                                                                                                                                                                                           |  |
| Q79.                                                                                                                                                                                                                                                                                                                                                                                                                                                                                           | What are the main activities you follow when talking about FP to clients?<br><br>PROBE: "ANYTHING ELSE?"<br><b>MULTIPLE RESPONSES POSSIBLE.</b><br><b>CIRCLE ALL MENTIONED.</b> | IDENTIFY REPRODUCTIVE GOALS OF WOMAN.....A<br>PROVIDE INFORMATION ABOUT DIFFERENT FP METHODS.....B<br>DISCUSS THE CLIENT'S FP PREFERENCES...C<br>HELP WOMEN SELECT A SUITABLE METHOD.....D<br>EDUCATE WOMEN TO USE THE SELECTED METHOD.....E<br>EXPLAIN SIDE-EFFECTS.....F<br>EXPLAIN SPECIFIC MEDICAL REASONS TO RETURN.....G<br>OTHERS: _____ X<br>(SPECIFY)                                                                                                                                                                                                                                   |  |
| Q80.                                                                                                                                                                                                                                                                                                                                                                                                                                                                                           | Do you tell women where they can obtain an FP method?                                                                                                                           | YES.....1<br>NO.....2  <b>All skip to Q83</b>                                                                                                                                                                                                                                                                                                                                                                                                                                                               |  |
| Q81.                                                                                                                                                                                                                                                                                                                                                                                                                                                                                           | Why are you not able to provide FP information routinely?<br><br>PROBE: "ANYTHING ELSE?"<br><b>MULTIPLE RESPONSES POSSIBLE.</b><br><b>CIRCLE ALL MENTIONED.</b>                 | ADEQUATE CONTRACEPTIVE METHODS FREQUENTLY UNAVAILABLE.....A<br>AVAILABLE CONTRACEPTIVES OFTEN PAST EXPIRATION DATE.....B<br>LACK OF STERILE EQUIPMENT SO NO POINT DISCUSSING.....C<br>LACK OF FUNCTIONAL EQUIPMENT SO NO POINT DISCUSSING.....D<br>NO INTEREST IN PROVIDING FP INFORMATION.....E<br>LACK KNOWLEDGE ABOUT FP.....F<br>DO NOT FEEL ADEQUATELY TRAINED TO PROVIDE FP INFORMATION.....G<br>NO INTEREST IN FP ON THE PART OF THE PATIENTS.....H<br>OVERLOAD OF WORK/NO TIME.....I<br>NO NEED TO.....K<br>NOT A PROFITABLE SERVICE TO PROVIDE.....L<br><br>OTHERS _____ X<br>(SPECIFY) |  |

|      |                                                                                                                                                                                                                                                                                         |                                                                                                                                                                                                                                                                                                                                                                                                                                                                                                                                                                                             |                        |
|------|-----------------------------------------------------------------------------------------------------------------------------------------------------------------------------------------------------------------------------------------------------------------------------------------|---------------------------------------------------------------------------------------------------------------------------------------------------------------------------------------------------------------------------------------------------------------------------------------------------------------------------------------------------------------------------------------------------------------------------------------------------------------------------------------------------------------------------------------------------------------------------------------------|------------------------|
| Q82. | Would you be willing to include family planning information routinely in your curative care services/visits for women or children?                                                                                                                                                      | YES.....1<br>NO.....2                                                                                                                                                                                                                                                                                                                                                                                                                                                                                                                                                                       |                        |
| Q83. | <b>CHECK Q36:</b><br>IF <b>ANY</b> OF THE OPTIONS I (HIV/AIDS MANAGEMENT), OPTION J (PMTCT), OR K (VCT) ARE CIRCLED <input type="checkbox"/> ↓<br>IF <b>NONE</b> OF THE OPTIONS I (HIV/AIDS MANAGEMENT), OPTION J (PMTCT), OR K (VCT) ARE CIRCLED <input type="checkbox"/> → <b>Q89</b> |                                                                                                                                                                                                                                                                                                                                                                                                                                                                                                                                                                                             |                        |
| Q84. | While providing HIV-related services (HIV/AIDS management, PMTCT, and/or VCT) to women and men, do you provide information on FP routinely?                                                                                                                                             | YES.....1<br>NO.....2 →                                                                                                                                                                                                                                                                                                                                                                                                                                                                                                                                                                     | <b>Q87</b>             |
| Q85. | What are the main activities you follow when talking about FP to clients?<br><br>PROBE: "ANYTHING ELSE?"<br><b>MULTIPLE RESPONSES POSSIBLE.</b><br><b>CIRCLE ALL MENTIONED.</b>                                                                                                         | IDENTIFY REPRODUCTIVE GOALS OF WOMAN...A<br>PROVIDE INFORMATION ABOUT DIFFERENT FP METHODS.....B<br>DISCUSS THE CLIENT'S FP PREFERENCES.....C<br>HELP WOMEN SELECT A SUITABLE METHOD.....D<br>EDUCATE WOMEN TO USE THE SELECTED METHOD.....E<br>EXPLAIN SIDE-EFFECTS.....F<br>EXPLAIN SPECIFIC MEDICAL REASONS TO RETURN.....G<br>DISCUSS HIV/AIDS PREVENTION METHODS.....H<br>DISCUSS METHODS NOT RECOMMENDED FOR HIV POSITIVE (LAM, IUD).....I<br>RECOMMEND ALWAYS USE CONDOM IN ADDITION TO OTHER FP METHODS.....J<br>REQUEST FOR PARTNER'S CONSENT.....K<br>OTHERS: .....X<br>(SPECIFY) |                        |
| Q86. | Do you tell women where they can obtain an FP method?                                                                                                                                                                                                                                   | YES.....1<br>NO.....2 } →                                                                                                                                                                                                                                                                                                                                                                                                                                                                                                                                                                   | <b>All skip to Q89</b> |
| Q87. | Why are you not able to provide FP information routinely?<br><br>PROBE: "ANYTHING ELSE?"<br><b>MULTIPLE RESPONSES POSSIBLE.</b><br><b>CIRCLE ALL MENTIONED.</b>                                                                                                                         | ADEQUATE CONTRACEPTIVE METHODS FREQUENTLY UNAVAILABLE.....A<br>AVAILABLE CONTRACEPTIVES OFTEN PAST EXPIRATION DATE.....B<br>LACK OF STERILE EQUIPMENT SO NO POINT DISCUSSING.....C<br>LACK OF FUNCTIONAL EQUIPMENT SO NO POINT DISCUSSING.....D<br>NO INTEREST IN PROVIDING FP INFORMATION.....E<br>LACK KNOWLEDGE ABOUT FP.....F<br>DO NOT FEEL ADEQUATELY TRAINED TO PROVIDE FP INFORMATION.....G<br>NO INTEREST IN FP ON THE PART OF THE PATIENTS.....H<br>OVERLOAD OF WORK/NO TIME.....I<br>NO NEED TO.....K<br>NOT A PROFITABLE SERVICE TO PROVIDE.....L<br>OTHERS .....X<br>(SPECIFY) |                        |
| Q88. | Would you be willing to include family planning information routinely in your HIV-related services/visits for women and men?                                                                                                                                                            | YES.....1<br>NO.....2                                                                                                                                                                                                                                                                                                                                                                                                                                                                                                                                                                       |                        |

| <b>Integrated Supportive Supervision (ISS)</b> |                                                                                        |                                                                                                                    |            |
|------------------------------------------------|----------------------------------------------------------------------------------------|--------------------------------------------------------------------------------------------------------------------|------------|
| Q89.                                           | Have you received an integrated supportive supervision visit in the last three months? | YES.....1<br>NO.....2 →                                                                                            | <b>Q93</b> |
| Q90.                                           | Which organization/group visited you?                                                  | NURHI.....1<br>STATE GOVERNMENT.....2<br>FEDERAL GOVERNMENT.....3<br>OTHER .....6<br>(SPECIFY)<br>DON'T KNOW.....8 |            |

|      |                                                                                                                                                                   |                                                                                                                                                                                |                        |
|------|-------------------------------------------------------------------------------------------------------------------------------------------------------------------|--------------------------------------------------------------------------------------------------------------------------------------------------------------------------------|------------------------|
| Q91. | What type of feedback did you receive?                                                                                                                            | RECEIVED VERBAL/WRITTEN FEEDBACK.....A<br>RECEIVED HANDS ON/PRACTICAL TRAINING...B<br>RECEIVED DEMONSTRATION.....C<br>OTHER _____ X<br>(SPECIFY)<br>RECEIVED NO FEEDBACK.....Y | <b>A-X SKIP TO Q93</b> |
| Q92. | Would you like to receive feedback?                                                                                                                               | YES.....1<br>NO.....2                                                                                                                                                          |                        |
| Q93. | Is this facility linked with another organization that provides family planning methods and materials at a discounted rate or for free (for example PPFN or SFH)? | YES.....1<br>NO.....2 →<br>DON'T KNOW.....8 →                                                                                                                                  | <b>Q94c<br/>Q94c</b>   |

|       |                                       |                                                                                    |  |
|-------|---------------------------------------|------------------------------------------------------------------------------------|--|
| Q94a. | What is the name of the organization? | Q94b. What year did this facility begin to associate with each organization named? |  |
|       | 1.                                    | YEAR ..... [ ] [ ] [ ] [ ]<br>DON'T KNOW ..... 9998                                |  |
|       | 2.                                    | YEAR ..... [ ] [ ] [ ] [ ]<br>DON'T KNOW ..... 9998                                |  |
|       | 3.                                    | YEAR ..... [ ] [ ] [ ] [ ]<br>DON'T KNOW ..... 9998                                |  |
|       | 4.                                    | YEAR ..... [ ] [ ] [ ] [ ]<br>DON'T KNOW ..... 9998                                |  |

The following questions ask your perspective about the facility's administration. All of your responses will remain confidential and will not be shared with anyone outside the study team.

|      |                                                                                             |                                                                                                                                                                                                                                                                                                                                                    |                      |
|------|---------------------------------------------------------------------------------------------|----------------------------------------------------------------------------------------------------------------------------------------------------------------------------------------------------------------------------------------------------------------------------------------------------------------------------------------------------|----------------------|
| Q94c | Is there one staff member in particular who advocates for family planning at this facility? | YES.....1<br>NO.....2 →<br>DON'T KNOW.....8 →                                                                                                                                                                                                                                                                                                      | <b>Q94e<br/>Q94e</b> |
| Q94d | What cadre of staff are they?                                                               | OBSTETRICIAN/GYNECOLOGIST.....01<br>GENERAL SURGEON.....02<br>PEDIATRICIAN.....03<br>GENERAL PHYSICIAN.....04<br>THEATRE NURSE.....05<br>NURSE/MIDWIFE.....06<br>NURSE.....07<br>MIDWIFE.....08<br>COMMUNITY HEALTH EXTENSION WORKER (CHEW).....09<br>COMMUNITY HEALTH OFFICER (CHO).....10<br>VCT COUNSELOR.....11<br>OTHER _____ 96<br>(SPECIFY) |                      |

| How supportive is this facility's administration of: |                                                                             |                   |              |            |                 |
|------------------------------------------------------|-----------------------------------------------------------------------------|-------------------|--------------|------------|-----------------|
|                                                      |                                                                             | VERY UNSUPPORTIVE | UNSUPPORTIVE | SUPPORTIVE | VERY SUPPORTIVE |
| Q94e                                                 | Family Planning programs                                                    | 1                 | 2            | 3          | 4               |
| Q94f                                                 | FP community outreach                                                       | 1                 | 2            | 3          | 4               |
| Q94g                                                 | Training on FP methods                                                      | 1                 | 2            | 3          | 4               |
| Q94h                                                 | Providing financial resources for FP efforts                                | 1                 | 2            | 3          | 4               |
| Q94i                                                 | Ensuring minimal stock-outs of FP methods                                   | 1                 | 2            | 3          | 4               |
| Q94j                                                 | Partnering with other organizations to provide FP trainings in the facility | 1                 | 2            | 3          | 4               |
| Q94k                                                 | Providing competitive wages for its employees                               | 1                 | 2            | 3          | 4               |
| Q94l                                                 | Ensuring adequate staffing levels                                           | 1                 | 2            | 3          | 4               |
| Q94m                                                 | Minimizing staff turnover                                                   | 1                 | 2            | 3          | 4               |

|      |                                      |                                                      |                                                         |
|------|--------------------------------------|------------------------------------------------------|---------------------------------------------------------|
| Q95. | RECORD THE TIME<br>IN 24 HOUR FORMAT | HOUR ..... <input type="text"/> <input type="text"/> | MINUTES ..... <input type="text"/> <input type="text"/> |
|------|--------------------------------------|------------------------------------------------------|---------------------------------------------------------|

Thank you very much for taking the time to answer my questions. Once again, any information you have given will be kept completely confidential. Have a good day!

**COMMENTS:**
