# Supplementary material for: Assessing the sustainability of the Nigerian urban reproductive health initiative facility-level programming: longitudinal analysis of service quality
Source: Springer Nature journal article supplement (doi:10.1186/s12913-019-4388-3), 2019-08-09
Supplement: MOESM2 [file 17054230]

## Measurement, Learning & Evaluation (MLE) Project Health Facility audit – Nigeria - 2017

|                                                                                                |                                                                                                                                                                                                                                                                                                                                                                                                                                                                                                                                                                                                                                                                                                                                                                                                                                                                                                                                                                                                                                                                                                                                                                                                                                                                                                                                                                                                                                                                                                                                                                                                                                                                                                                                                                                                                                                                                                                                                           |                      |     |                     |     |                                  |     |                           |     |                          |    |                                   |    |                     |    |                   |    |           |  |                       |  |                       |    |                     |    |                              |    |                             |    |                    |    |           |  |            |  |                       |    |                                     |    |              |  |                         |    |                       |    |            |    |           |  |
|------------------------------------------------------------------------------------------------|-----------------------------------------------------------------------------------------------------------------------------------------------------------------------------------------------------------------------------------------------------------------------------------------------------------------------------------------------------------------------------------------------------------------------------------------------------------------------------------------------------------------------------------------------------------------------------------------------------------------------------------------------------------------------------------------------------------------------------------------------------------------------------------------------------------------------------------------------------------------------------------------------------------------------------------------------------------------------------------------------------------------------------------------------------------------------------------------------------------------------------------------------------------------------------------------------------------------------------------------------------------------------------------------------------------------------------------------------------------------------------------------------------------------------------------------------------------------------------------------------------------------------------------------------------------------------------------------------------------------------------------------------------------------------------------------------------------------------------------------------------------------------------------------------------------------------------------------------------------------------------------------------------------------------------------------------------------|----------------------|-----|---------------------|-----|----------------------------------|-----|---------------------------|-----|--------------------------|----|-----------------------------------|----|---------------------|----|-------------------|----|-----------|--|-----------------------|--|-----------------------|----|---------------------|----|------------------------------|----|-----------------------------|----|--------------------|----|-----------|--|------------|--|-----------------------|----|-------------------------------------|----|--------------|--|-------------------------|----|-----------------------|----|------------|----|-----------|--|
| CITY NAME & CODE _____<br><span style="margin-left: 150px;">(Ilorin=4, Kaduna=5, Jos=9)</span> | [ ]                                                                                                                                                                                                                                                                                                                                                                                                                                                                                                                                                                                                                                                                                                                                                                                                                                                                                                                                                                                                                                                                                                                                                                                                                                                                                                                                                                                                                                                                                                                                                                                                                                                                                                                                                                                                                                                                                                                                                       |                      |     |                     |     |                                  |     |                           |     |                          |    |                                   |    |                     |    |                   |    |           |  |                       |  |                       |    |                     |    |                              |    |                             |    |                    |    |           |  |            |  |                       |    |                                     |    |              |  |                         |    |                       |    |            |    |           |  |
| LGA NAME & CODE _____                                                                          | [ ] [ ] [ ] [ ]                                                                                                                                                                                                                                                                                                                                                                                                                                                                                                                                                                                                                                                                                                                                                                                                                                                                                                                                                                                                                                                                                                                                                                                                                                                                                                                                                                                                                                                                                                                                                                                                                                                                                                                                                                                                                                                                                                                                           |                      |     |                     |     |                                  |     |                           |     |                          |    |                                   |    |                     |    |                   |    |           |  |                       |  |                       |    |                     |    |                              |    |                             |    |                    |    |           |  |            |  |                       |    |                                     |    |              |  |                         |    |                       |    |            |    |           |  |
| LOCALITY NAME & CODE _____                                                                     | [ ] [ ] [ ] [ ] [ ] [ ]                                                                                                                                                                                                                                                                                                                                                                                                                                                                                                                                                                                                                                                                                                                                                                                                                                                                                                                                                                                                                                                                                                                                                                                                                                                                                                                                                                                                                                                                                                                                                                                                                                                                                                                                                                                                                                                                                                                                   |                      |     |                     |     |                                  |     |                           |     |                          |    |                                   |    |                     |    |                   |    |           |  |                       |  |                       |    |                     |    |                              |    |                             |    |                    |    |           |  |            |  |                       |    |                                     |    |              |  |                         |    |                       |    |            |    |           |  |
| FACILITY NAME AND CODE _____                                                                   | [ ] [ ] [ ] [ ] [ ] [ ] [ ] [ ]                                                                                                                                                                                                                                                                                                                                                                                                                                                                                                                                                                                                                                                                                                                                                                                                                                                                                                                                                                                                                                                                                                                                                                                                                                                                                                                                                                                                                                                                                                                                                                                                                                                                                                                                                                                                                                                                                                                           |                      |     |                     |     |                                  |     |                           |     |                          |    |                                   |    |                     |    |                   |    |           |  |                       |  |                       |    |                     |    |                              |    |                             |    |                    |    |           |  |            |  |                       |    |                                     |    |              |  |                         |    |                       |    |            |    |           |  |
| FACILITY PHYSICAL ADDRESS _____                                                                |                                                                                                                                                                                                                                                                                                                                                                                                                                                                                                                                                                                                                                                                                                                                                                                                                                                                                                                                                                                                                                                                                                                                                                                                                                                                                                                                                                                                                                                                                                                                                                                                                                                                                                                                                                                                                                                                                                                                                           |                      |     |                     |     |                                  |     |                           |     |                          |    |                                   |    |                     |    |                   |    |           |  |                       |  |                       |    |                     |    |                              |    |                             |    |                    |    |           |  |            |  |                       |    |                                     |    |              |  |                         |    |                       |    |            |    |           |  |
| <b>LOCATION OF FACILITY</b>                                                                    |                                                                                                                                                                                                                                                                                                                                                                                                                                                                                                                                                                                                                                                                                                                                                                                                                                                                                                                                                                                                                                                                                                                                                                                                                                                                                                                                                                                                                                                                                                                                                                                                                                                                                                                                                                                                                                                                                                                                                           |                      |     |                     |     |                                  |     |                           |     |                          |    |                                   |    |                     |    |                   |    |           |  |                       |  |                       |    |                     |    |                              |    |                             |    |                    |    |           |  |            |  |                       |    |                                     |    |              |  |                         |    |                       |    |            |    |           |  |
| GPS Reading                                                                                    | [ ] [ ] [ ] [ ] [ ] [ ]                                                                                                                                                                                                                                                                                                                                                                                                                                                                                                                                                                                                                                                                                                                                                                                                                                                                                                                                                                                                                                                                                                                                                                                                                                                                                                                                                                                                                                                                                                                                                                                                                                                                                                                                                                                                                                                                                                                                   |                      |     |                     |     |                                  |     |                           |     |                          |    |                                   |    |                     |    |                   |    |           |  |                       |  |                       |    |                     |    |                              |    |                             |    |                    |    |           |  |            |  |                       |    |                                     |    |              |  |                         |    |                       |    |            |    |           |  |
| Altitude .....                                                                                 | [ ] [ ] [ ] [ ] [ ] [ ]                                                                                                                                                                                                                                                                                                                                                                                                                                                                                                                                                                                                                                                                                                                                                                                                                                                                                                                                                                                                                                                                                                                                                                                                                                                                                                                                                                                                                                                                                                                                                                                                                                                                                                                                                                                                                                                                                                                                   |                      |     |                     |     |                                  |     |                           |     |                          |    |                                   |    |                     |    |                   |    |           |  |                       |  |                       |    |                     |    |                              |    |                             |    |                    |    |           |  |            |  |                       |    |                                     |    |              |  |                         |    |                       |    |            |    |           |  |
| Latitude .....                                                                                 | <table border="1" style="display: inline-table; border-collapse: collapse;"> <tr> <td style="text-align: center;">N</td> <td style="width: 20px;">[ ]</td> </tr> </table>                                                                                                                                                                                                                                                                                                                                                                                                                                                                                                                                                                                                                                                                                                                                                                                                                                                                                                                                                                                                                                                                                                                                                                                                                                                                                                                                                                                                                                                                                                                                                                     | N                    | [ ] | [ ]                 | [ ] | [ ]                              | [ ] | [ ]                       | [ ] |                          |    |                                   |    |                     |    |                   |    |           |  |                       |  |                       |    |                     |    |                              |    |                             |    |                    |    |           |  |            |  |                       |    |                                     |    |              |  |                         |    |                       |    |            |    |           |  |
| N                                                                                              | [ ]                                                                                                                                                                                                                                                                                                                                                                                                                                                                                                                                                                                                                                                                                                                                                                                                                                                                                                                                                                                                                                                                                                                                                                                                                                                                                                                                                                                                                                                                                                                                                                                                                                                                                                                                                                                                                                                                                                                                                       | [ ]                  | [ ] | [ ]                 | [ ] | [ ]                              | [ ] |                           |     |                          |    |                                   |    |                     |    |                   |    |           |  |                       |  |                       |    |                     |    |                              |    |                             |    |                    |    |           |  |            |  |                       |    |                                     |    |              |  |                         |    |                       |    |            |    |           |  |
| Longitude .....                                                                                | <table border="1" style="display: inline-table; border-collapse: collapse;"> <tr> <td style="text-align: center;">E</td> <td style="width: 20px;">[ ]</td> </tr> </table>                                                                                                                                                                                                                                                                                                                                                                                                                                                                                                                                                                                                                                                                                                                                                                                                                                                                                                                                                                                                                                                                                                                                                                                                                                                                                                                                                                                                                                                                                                                                                                     | E                    | [ ] | [ ]                 | [ ] | [ ]                              | [ ] | [ ]                       | [ ] |                          |    |                                   |    |                     |    |                   |    |           |  |                       |  |                       |    |                     |    |                              |    |                             |    |                    |    |           |  |            |  |                       |    |                                     |    |              |  |                         |    |                       |    |            |    |           |  |
| E                                                                                              | [ ]                                                                                                                                                                                                                                                                                                                                                                                                                                                                                                                                                                                                                                                                                                                                                                                                                                                                                                                                                                                                                                                                                                                                                                                                                                                                                                                                                                                                                                                                                                                                                                                                                                                                                                                                                                                                                                                                                                                                                       | [ ]                  | [ ] | [ ]                 | [ ] | [ ]                              | [ ] |                           |     |                          |    |                                   |    |                     |    |                   |    |           |  |                       |  |                       |    |                     |    |                              |    |                             |    |                    |    |           |  |            |  |                       |    |                                     |    |              |  |                         |    |                       |    |            |    |           |  |
| <b>TYPE OF HEALTH FACILITY</b>                                                                 | <table style="width: 100%; border-collapse: collapse;"> <tr> <td colspan="2"><b>PUBLIC SECTOR</b></td> </tr> <tr> <td>GOVT. HOSPITAL.....</td> <td style="text-align: right;">11</td> </tr> <tr> <td>WOMEN AND CHILDREN HOSPITAL.....</td> <td style="text-align: right;">12</td> </tr> <tr> <td>CHILD WELFARE CLINIC.....</td> <td style="text-align: right;">13</td> </tr> <tr> <td>GOVT. HEALTH CENTRE.....</td> <td style="text-align: right;">14</td> </tr> <tr> <td>GOVT. HEALTH POST/DISPENSARY.....</td> <td style="text-align: right;">15</td> </tr> <tr> <td>MATERNITY HOME.....</td> <td style="text-align: right;">16</td> </tr> <tr> <td>OTHER PUBLIC.....</td> <td style="text-align: right;">18</td> </tr> <tr> <td colspan="2" style="text-align: center;">(SPECIFY)</td> </tr> <tr> <td colspan="2"><b>PRIVATE SECTOR</b></td> </tr> <tr> <td>PRIVATE HOSPITAL.....</td> <td style="text-align: right;">21</td> </tr> <tr> <td>PRIVATE CLINIC.....</td> <td style="text-align: right;">22</td> </tr> <tr> <td>PRIVATE DOCTOR'S OFFICE.....</td> <td style="text-align: right;">23</td> </tr> <tr> <td>NURSING/MATERNITY HOME.....</td> <td style="text-align: right;">24</td> </tr> <tr> <td>OTHER PRIVATE.....</td> <td style="text-align: right;">29</td> </tr> <tr> <td colspan="2" style="text-align: center;">(SPECIFY)</td> </tr> <tr> <td colspan="2"><b>FBO</b></td> </tr> <tr> <td>MISSION HOSPITAL.....</td> <td style="text-align: right;">31</td> </tr> <tr> <td>FAITH-BASED HOME/HEALTH CENTRE.....</td> <td style="text-align: right;">32</td> </tr> <tr> <td colspan="2"><b>OTHER</b></td> </tr> <tr> <td>OTHER NGO HOSPITAL.....</td> <td style="text-align: right;">41</td> </tr> <tr> <td>OTHER NGO CLINIC.....</td> <td style="text-align: right;">42</td> </tr> <tr> <td>Other.....</td> <td style="text-align: right;">96</td> </tr> <tr> <td colspan="2" style="text-align: center;">(Specify)</td> </tr> </table> | <b>PUBLIC SECTOR</b> |     | GOVT. HOSPITAL..... | 11  | WOMEN AND CHILDREN HOSPITAL..... | 12  | CHILD WELFARE CLINIC..... | 13  | GOVT. HEALTH CENTRE..... | 14 | GOVT. HEALTH POST/DISPENSARY..... | 15 | MATERNITY HOME..... | 16 | OTHER PUBLIC..... | 18 | (SPECIFY) |  | <b>PRIVATE SECTOR</b> |  | PRIVATE HOSPITAL..... | 21 | PRIVATE CLINIC..... | 22 | PRIVATE DOCTOR'S OFFICE..... | 23 | NURSING/MATERNITY HOME..... | 24 | OTHER PRIVATE..... | 29 | (SPECIFY) |  | <b>FBO</b> |  | MISSION HOSPITAL..... | 31 | FAITH-BASED HOME/HEALTH CENTRE..... | 32 | <b>OTHER</b> |  | OTHER NGO HOSPITAL..... | 41 | OTHER NGO CLINIC..... | 42 | Other..... | 96 | (Specify) |  |
| <b>PUBLIC SECTOR</b>                                                                           |                                                                                                                                                                                                                                                                                                                                                                                                                                                                                                                                                                                                                                                                                                                                                                                                                                                                                                                                                                                                                                                                                                                                                                                                                                                                                                                                                                                                                                                                                                                                                                                                                                                                                                                                                                                                                                                                                                                                                           |                      |     |                     |     |                                  |     |                           |     |                          |    |                                   |    |                     |    |                   |    |           |  |                       |  |                       |    |                     |    |                              |    |                             |    |                    |    |           |  |            |  |                       |    |                                     |    |              |  |                         |    |                       |    |            |    |           |  |
| GOVT. HOSPITAL.....                                                                            | 11                                                                                                                                                                                                                                                                                                                                                                                                                                                                                                                                                                                                                                                                                                                                                                                                                                                                                                                                                                                                                                                                                                                                                                                                                                                                                                                                                                                                                                                                                                                                                                                                                                                                                                                                                                                                                                                                                                                                                        |                      |     |                     |     |                                  |     |                           |     |                          |    |                                   |    |                     |    |                   |    |           |  |                       |  |                       |    |                     |    |                              |    |                             |    |                    |    |           |  |            |  |                       |    |                                     |    |              |  |                         |    |                       |    |            |    |           |  |
| WOMEN AND CHILDREN HOSPITAL.....                                                               | 12                                                                                                                                                                                                                                                                                                                                                                                                                                                                                                                                                                                                                                                                                                                                                                                                                                                                                                                                                                                                                                                                                                                                                                                                                                                                                                                                                                                                                                                                                                                                                                                                                                                                                                                                                                                                                                                                                                                                                        |                      |     |                     |     |                                  |     |                           |     |                          |    |                                   |    |                     |    |                   |    |           |  |                       |  |                       |    |                     |    |                              |    |                             |    |                    |    |           |  |            |  |                       |    |                                     |    |              |  |                         |    |                       |    |            |    |           |  |
| CHILD WELFARE CLINIC.....                                                                      | 13                                                                                                                                                                                                                                                                                                                                                                                                                                                                                                                                                                                                                                                                                                                                                                                                                                                                                                                                                                                                                                                                                                                                                                                                                                                                                                                                                                                                                                                                                                                                                                                                                                                                                                                                                                                                                                                                                                                                                        |                      |     |                     |     |                                  |     |                           |     |                          |    |                                   |    |                     |    |                   |    |           |  |                       |  |                       |    |                     |    |                              |    |                             |    |                    |    |           |  |            |  |                       |    |                                     |    |              |  |                         |    |                       |    |            |    |           |  |
| GOVT. HEALTH CENTRE.....                                                                       | 14                                                                                                                                                                                                                                                                                                                                                                                                                                                                                                                                                                                                                                                                                                                                                                                                                                                                                                                                                                                                                                                                                                                                                                                                                                                                                                                                                                                                                                                                                                                                                                                                                                                                                                                                                                                                                                                                                                                                                        |                      |     |                     |     |                                  |     |                           |     |                          |    |                                   |    |                     |    |                   |    |           |  |                       |  |                       |    |                     |    |                              |    |                             |    |                    |    |           |  |            |  |                       |    |                                     |    |              |  |                         |    |                       |    |            |    |           |  |
| GOVT. HEALTH POST/DISPENSARY.....                                                              | 15                                                                                                                                                                                                                                                                                                                                                                                                                                                                                                                                                                                                                                                                                                                                                                                                                                                                                                                                                                                                                                                                                                                                                                                                                                                                                                                                                                                                                                                                                                                                                                                                                                                                                                                                                                                                                                                                                                                                                        |                      |     |                     |     |                                  |     |                           |     |                          |    |                                   |    |                     |    |                   |    |           |  |                       |  |                       |    |                     |    |                              |    |                             |    |                    |    |           |  |            |  |                       |    |                                     |    |              |  |                         |    |                       |    |            |    |           |  |
| MATERNITY HOME.....                                                                            | 16                                                                                                                                                                                                                                                                                                                                                                                                                                                                                                                                                                                                                                                                                                                                                                                                                                                                                                                                                                                                                                                                                                                                                                                                                                                                                                                                                                                                                                                                                                                                                                                                                                                                                                                                                                                                                                                                                                                                                        |                      |     |                     |     |                                  |     |                           |     |                          |    |                                   |    |                     |    |                   |    |           |  |                       |  |                       |    |                     |    |                              |    |                             |    |                    |    |           |  |            |  |                       |    |                                     |    |              |  |                         |    |                       |    |            |    |           |  |
| OTHER PUBLIC.....                                                                              | 18                                                                                                                                                                                                                                                                                                                                                                                                                                                                                                                                                                                                                                                                                                                                                                                                                                                                                                                                                                                                                                                                                                                                                                                                                                                                                                                                                                                                                                                                                                                                                                                                                                                                                                                                                                                                                                                                                                                                                        |                      |     |                     |     |                                  |     |                           |     |                          |    |                                   |    |                     |    |                   |    |           |  |                       |  |                       |    |                     |    |                              |    |                             |    |                    |    |           |  |            |  |                       |    |                                     |    |              |  |                         |    |                       |    |            |    |           |  |
| (SPECIFY)                                                                                      |                                                                                                                                                                                                                                                                                                                                                                                                                                                                                                                                                                                                                                                                                                                                                                                                                                                                                                                                                                                                                                                                                                                                                                                                                                                                                                                                                                                                                                                                                                                                                                                                                                                                                                                                                                                                                                                                                                                                                           |                      |     |                     |     |                                  |     |                           |     |                          |    |                                   |    |                     |    |                   |    |           |  |                       |  |                       |    |                     |    |                              |    |                             |    |                    |    |           |  |            |  |                       |    |                                     |    |              |  |                         |    |                       |    |            |    |           |  |
| <b>PRIVATE SECTOR</b>                                                                          |                                                                                                                                                                                                                                                                                                                                                                                                                                                                                                                                                                                                                                                                                                                                                                                                                                                                                                                                                                                                                                                                                                                                                                                                                                                                                                                                                                                                                                                                                                                                                                                                                                                                                                                                                                                                                                                                                                                                                           |                      |     |                     |     |                                  |     |                           |     |                          |    |                                   |    |                     |    |                   |    |           |  |                       |  |                       |    |                     |    |                              |    |                             |    |                    |    |           |  |            |  |                       |    |                                     |    |              |  |                         |    |                       |    |            |    |           |  |
| PRIVATE HOSPITAL.....                                                                          | 21                                                                                                                                                                                                                                                                                                                                                                                                                                                                                                                                                                                                                                                                                                                                                                                                                                                                                                                                                                                                                                                                                                                                                                                                                                                                                                                                                                                                                                                                                                                                                                                                                                                                                                                                                                                                                                                                                                                                                        |                      |     |                     |     |                                  |     |                           |     |                          |    |                                   |    |                     |    |                   |    |           |  |                       |  |                       |    |                     |    |                              |    |                             |    |                    |    |           |  |            |  |                       |    |                                     |    |              |  |                         |    |                       |    |            |    |           |  |
| PRIVATE CLINIC.....                                                                            | 22                                                                                                                                                                                                                                                                                                                                                                                                                                                                                                                                                                                                                                                                                                                                                                                                                                                                                                                                                                                                                                                                                                                                                                                                                                                                                                                                                                                                                                                                                                                                                                                                                                                                                                                                                                                                                                                                                                                                                        |                      |     |                     |     |                                  |     |                           |     |                          |    |                                   |    |                     |    |                   |    |           |  |                       |  |                       |    |                     |    |                              |    |                             |    |                    |    |           |  |            |  |                       |    |                                     |    |              |  |                         |    |                       |    |            |    |           |  |
| PRIVATE DOCTOR'S OFFICE.....                                                                   | 23                                                                                                                                                                                                                                                                                                                                                                                                                                                                                                                                                                                                                                                                                                                                                                                                                                                                                                                                                                                                                                                                                                                                                                                                                                                                                                                                                                                                                                                                                                                                                                                                                                                                                                                                                                                                                                                                                                                                                        |                      |     |                     |     |                                  |     |                           |     |                          |    |                                   |    |                     |    |                   |    |           |  |                       |  |                       |    |                     |    |                              |    |                             |    |                    |    |           |  |            |  |                       |    |                                     |    |              |  |                         |    |                       |    |            |    |           |  |
| NURSING/MATERNITY HOME.....                                                                    | 24                                                                                                                                                                                                                                                                                                                                                                                                                                                                                                                                                                                                                                                                                                                                                                                                                                                                                                                                                                                                                                                                                                                                                                                                                                                                                                                                                                                                                                                                                                                                                                                                                                                                                                                                                                                                                                                                                                                                                        |                      |     |                     |     |                                  |     |                           |     |                          |    |                                   |    |                     |    |                   |    |           |  |                       |  |                       |    |                     |    |                              |    |                             |    |                    |    |           |  |            |  |                       |    |                                     |    |              |  |                         |    |                       |    |            |    |           |  |
| OTHER PRIVATE.....                                                                             | 29                                                                                                                                                                                                                                                                                                                                                                                                                                                                                                                                                                                                                                                                                                                                                                                                                                                                                                                                                                                                                                                                                                                                                                                                                                                                                                                                                                                                                                                                                                                                                                                                                                                                                                                                                                                                                                                                                                                                                        |                      |     |                     |     |                                  |     |                           |     |                          |    |                                   |    |                     |    |                   |    |           |  |                       |  |                       |    |                     |    |                              |    |                             |    |                    |    |           |  |            |  |                       |    |                                     |    |              |  |                         |    |                       |    |            |    |           |  |
| (SPECIFY)                                                                                      |                                                                                                                                                                                                                                                                                                                                                                                                                                                                                                                                                                                                                                                                                                                                                                                                                                                                                                                                                                                                                                                                                                                                                                                                                                                                                                                                                                                                                                                                                                                                                                                                                                                                                                                                                                                                                                                                                                                                                           |                      |     |                     |     |                                  |     |                           |     |                          |    |                                   |    |                     |    |                   |    |           |  |                       |  |                       |    |                     |    |                              |    |                             |    |                    |    |           |  |            |  |                       |    |                                     |    |              |  |                         |    |                       |    |            |    |           |  |
| <b>FBO</b>                                                                                     |                                                                                                                                                                                                                                                                                                                                                                                                                                                                                                                                                                                                                                                                                                                                                                                                                                                                                                                                                                                                                                                                                                                                                                                                                                                                                                                                                                                                                                                                                                                                                                                                                                                                                                                                                                                                                                                                                                                                                           |                      |     |                     |     |                                  |     |                           |     |                          |    |                                   |    |                     |    |                   |    |           |  |                       |  |                       |    |                     |    |                              |    |                             |    |                    |    |           |  |            |  |                       |    |                                     |    |              |  |                         |    |                       |    |            |    |           |  |
| MISSION HOSPITAL.....                                                                          | 31                                                                                                                                                                                                                                                                                                                                                                                                                                                                                                                                                                                                                                                                                                                                                                                                                                                                                                                                                                                                                                                                                                                                                                                                                                                                                                                                                                                                                                                                                                                                                                                                                                                                                                                                                                                                                                                                                                                                                        |                      |     |                     |     |                                  |     |                           |     |                          |    |                                   |    |                     |    |                   |    |           |  |                       |  |                       |    |                     |    |                              |    |                             |    |                    |    |           |  |            |  |                       |    |                                     |    |              |  |                         |    |                       |    |            |    |           |  |
| FAITH-BASED HOME/HEALTH CENTRE.....                                                            | 32                                                                                                                                                                                                                                                                                                                                                                                                                                                                                                                                                                                                                                                                                                                                                                                                                                                                                                                                                                                                                                                                                                                                                                                                                                                                                                                                                                                                                                                                                                                                                                                                                                                                                                                                                                                                                                                                                                                                                        |                      |     |                     |     |                                  |     |                           |     |                          |    |                                   |    |                     |    |                   |    |           |  |                       |  |                       |    |                     |    |                              |    |                             |    |                    |    |           |  |            |  |                       |    |                                     |    |              |  |                         |    |                       |    |            |    |           |  |
| <b>OTHER</b>                                                                                   |                                                                                                                                                                                                                                                                                                                                                                                                                                                                                                                                                                                                                                                                                                                                                                                                                                                                                                                                                                                                                                                                                                                                                                                                                                                                                                                                                                                                                                                                                                                                                                                                                                                                                                                                                                                                                                                                                                                                                           |                      |     |                     |     |                                  |     |                           |     |                          |    |                                   |    |                     |    |                   |    |           |  |                       |  |                       |    |                     |    |                              |    |                             |    |                    |    |           |  |            |  |                       |    |                                     |    |              |  |                         |    |                       |    |            |    |           |  |
| OTHER NGO HOSPITAL.....                                                                        | 41                                                                                                                                                                                                                                                                                                                                                                                                                                                                                                                                                                                                                                                                                                                                                                                                                                                                                                                                                                                                                                                                                                                                                                                                                                                                                                                                                                                                                                                                                                                                                                                                                                                                                                                                                                                                                                                                                                                                                        |                      |     |                     |     |                                  |     |                           |     |                          |    |                                   |    |                     |    |                   |    |           |  |                       |  |                       |    |                     |    |                              |    |                             |    |                    |    |           |  |            |  |                       |    |                                     |    |              |  |                         |    |                       |    |            |    |           |  |
| OTHER NGO CLINIC.....                                                                          | 42                                                                                                                                                                                                                                                                                                                                                                                                                                                                                                                                                                                                                                                                                                                                                                                                                                                                                                                                                                                                                                                                                                                                                                                                                                                                                                                                                                                                                                                                                                                                                                                                                                                                                                                                                                                                                                                                                                                                                        |                      |     |                     |     |                                  |     |                           |     |                          |    |                                   |    |                     |    |                   |    |           |  |                       |  |                       |    |                     |    |                              |    |                             |    |                    |    |           |  |            |  |                       |    |                                     |    |              |  |                         |    |                       |    |            |    |           |  |
| Other.....                                                                                     | 96                                                                                                                                                                                                                                                                                                                                                                                                                                                                                                                                                                                                                                                                                                                                                                                                                                                                                                                                                                                                                                                                                                                                                                                                                                                                                                                                                                                                                                                                                                                                                                                                                                                                                                                                                                                                                                                                                                                                                        |                      |     |                     |     |                                  |     |                           |     |                          |    |                                   |    |                     |    |                   |    |           |  |                       |  |                       |    |                     |    |                              |    |                             |    |                    |    |           |  |            |  |                       |    |                                     |    |              |  |                         |    |                       |    |            |    |           |  |
| (Specify)                                                                                      |                                                                                                                                                                                                                                                                                                                                                                                                                                                                                                                                                                                                                                                                                                                                                                                                                                                                                                                                                                                                                                                                                                                                                                                                                                                                                                                                                                                                                                                                                                                                                                                                                                                                                                                                                                                                                                                                                                                                                           |                      |     |                     |     |                                  |     |                           |     |                          |    |                                   |    |                     |    |                   |    |           |  |                       |  |                       |    |                     |    |                              |    |                             |    |                    |    |           |  |            |  |                       |    |                                     |    |              |  |                         |    |                       |    |            |    |           |  |
| <b>HEALTH FACILITY VOLUME TYPE</b>                                                             | <table style="width: 100%; border-collapse: collapse;"> <tr> <td>HIGH VOLUME.....</td> <td style="text-align: right;">1</td> </tr> <tr> <td>OTHER.....</td> <td style="text-align: right;">2</td> </tr> </table>                                                                                                                                                                                                                                                                                                                                                                                                                                                                                                                                                                                                                                                                                                                                                                                                                                                                                                                                                                                                                                                                                                                                                                                                                                                                                                                                                                                                                                                                                                                                                                                                                                                                                                                                          | HIGH VOLUME.....     | 1   | OTHER.....          | 2   |                                  |     |                           |     |                          |    |                                   |    |                     |    |                   |    |           |  |                       |  |                       |    |                     |    |                              |    |                             |    |                    |    |           |  |            |  |                       |    |                                     |    |              |  |                         |    |                       |    |            |    |           |  |
| HIGH VOLUME.....                                                                               | 1                                                                                                                                                                                                                                                                                                                                                                                                                                                                                                                                                                                                                                                                                                                                                                                                                                                                                                                                                                                                                                                                                                                                                                                                                                                                                                                                                                                                                                                                                                                                                                                                                                                                                                                                                                                                                                                                                                                                                         |                      |     |                     |     |                                  |     |                           |     |                          |    |                                   |    |                     |    |                   |    |           |  |                       |  |                       |    |                     |    |                              |    |                             |    |                    |    |           |  |            |  |                       |    |                                     |    |              |  |                         |    |                       |    |            |    |           |  |
| OTHER.....                                                                                     | 2                                                                                                                                                                                                                                                                                                                                                                                                                                                                                                                                                                                                                                                                                                                                                                                                                                                                                                                                                                                                                                                                                                                                                                                                                                                                                                                                                                                                                                                                                                                                                                                                                                                                                                                                                                                                                                                                                                                                                         |                      |     |                     |     |                                  |     |                           |     |                          |    |                                   |    |                     |    |                   |    |           |  |                       |  |                       |    |                     |    |                              |    |                             |    |                    |    |           |  |            |  |                       |    |                                     |    |              |  |                         |    |                       |    |            |    |           |  |
| <b>FACILITY WAS INTERVIEWED AT ENDLINE</b>                                                     | <table style="width: 100%; border-collapse: collapse;"> <tr> <td>YES.....</td> <td style="text-align: right;">1</td> </tr> <tr> <td>NO .....</td> <td style="text-align: right;">2</td> </tr> </table>                                                                                                                                                                                                                                                                                                                                                                                                                                                                                                                                                                                                                                                                                                                                                                                                                                                                                                                                                                                                                                                                                                                                                                                                                                                                                                                                                                                                                                                                                                                                                                                                                                                                                                                                                    | YES.....             | 1   | NO .....            | 2   |                                  |     |                           |     |                          |    |                                   |    |                     |    |                   |    |           |  |                       |  |                       |    |                     |    |                              |    |                             |    |                    |    |           |  |            |  |                       |    |                                     |    |              |  |                         |    |                       |    |            |    |           |  |
| YES.....                                                                                       | 1                                                                                                                                                                                                                                                                                                                                                                                                                                                                                                                                                                                                                                                                                                                                                                                                                                                                                                                                                                                                                                                                                                                                                                                                                                                                                                                                                                                                                                                                                                                                                                                                                                                                                                                                                                                                                                                                                                                                                         |                      |     |                     |     |                                  |     |                           |     |                          |    |                                   |    |                     |    |                   |    |           |  |                       |  |                       |    |                     |    |                              |    |                             |    |                    |    |           |  |            |  |                       |    |                                     |    |              |  |                         |    |                       |    |            |    |           |  |
| NO .....                                                                                       | 2                                                                                                                                                                                                                                                                                                                                                                                                                                                                                                                                                                                                                                                                                                                                                                                                                                                                                                                                                                                                                                                                                                                                                                                                                                                                                                                                                                                                                                                                                                                                                                                                                                                                                                                                                                                                                                                                                                                                                         |                      |     |                     |     |                                  |     |                           |     |                          |    |                                   |    |                     |    |                   |    |           |  |                       |  |                       |    |                     |    |                              |    |                             |    |                    |    |           |  |            |  |                       |    |                                     |    |              |  |                         |    |                       |    |            |    |           |  |

| INTERVIEWER VISITS                                                                                                                                                                                                                     |                                    |                                    |                                    |                                                                      |                                 |                                                                     |                                      |
|----------------------------------------------------------------------------------------------------------------------------------------------------------------------------------------------------------------------------------------|------------------------------------|------------------------------------|------------------------------------|----------------------------------------------------------------------|---------------------------------|---------------------------------------------------------------------|--------------------------------------|
| VISIT No.                                                                                                                                                                                                                              | 1                                  | 2                                  | 3                                  | FINAL VISIT                                                          |                                 |                                                                     |                                      |
| DATE                                                                                                                                                                                                                                   | DAY/ MONTH/ YEAR<br>[ _ / _ / 17 ] | DAY/ MONTH/ YEAR<br>[ _ / _ / 17 ] | DAY/ MONTH/ YEAR<br>[ _ / _ / 17 ] | DAY [ _ ] [ _ ]<br>MONTH [ _ ] [ _ ]<br>YEAR [ 2 ] [ 0 ] [ 1 ] [ 7 ] |                                 |                                                                     |                                      |
| INTERVIEWER'S NAME                                                                                                                                                                                                                     | _____                              | _____                              | _____                              | _____                                                                |                                 |                                                                     |                                      |
| INTERVIEWER CODE                                                                                                                                                                                                                       | [ ] [ ] [ ]                        | [ ] [ ] [ ]                        | [ ] [ ] [ ]                        | [ ] [ ] [ ]                                                          |                                 |                                                                     |                                      |
| RESULT*                                                                                                                                                                                                                                | [ ]                                | [ ]                                | [ ]                                | [ ]                                                                  |                                 |                                                                     |                                      |
| NEXT VISIT:<br>DATE                                                                                                                                                                                                                    | [ _ / _ / 17 ]                     | [ _ / _ / 17 ]                     | [ _ / _ / 17 ]                     | TOTAL NO. OF VISITS [ ]                                              |                                 |                                                                     |                                      |
| TIME                                                                                                                                                                                                                                   | [ ] [ ] [ ] [ ]<br>H H M M         | [ ] [ ] [ ] [ ]<br>H H M M         | [ ] [ ] [ ] [ ]<br>H H M M         |                                                                      |                                 |                                                                     |                                      |
| <b>*RESULT CODES:</b><br>1. COMPLETED<br>2. FACILITY MOVED OR IS DESTROYED<br>3. RESPONDENT NOT AVAILABLE (NOT AT WORK, ON STRIKE, ETC)<br>4. RESPONDENT REFUSED<br>5. PARTLY COMPLETED<br>6. POSTPONED<br>7. OTHER _____<br>(Specify) |                                    |                                    |                                    |                                                                      |                                 |                                                                     |                                      |
| <b>LANGUAGE</b>                                                                                                                                                                                                                        |                                    |                                    |                                    |                                                                      |                                 |                                                                     |                                      |
| LANGUAGE OF INTERVIEW                                                                                                                                                                                                                  | ENGLISH<br>1                       | HAUSA<br>2                         | YORUBA<br>3                        | IGBO<br>4                                                            | PIDGIN<br>5                     | OTHER (SPECIFY)<br>6 _____                                          | TRANSLATOR USED?<br>YES<br>1 NO<br>2 |
| <b>POSITION OF MAIN PERSON INTERVIEWED - CIRCLE ONE</b><br>CLINIC MANAGER/FACILITY ADMINISTRATOR.....01<br>PHYSICIAN.....02<br>NURSE.....03<br>MIDWIFE.....04<br>NURSE/ MIDWIFE.....05<br>CHEW.....06<br>OTHER _____ 96<br>(SPECIFY)   |                                    |                                    |                                    |                                                                      |                                 | <b>SEX OF MAIN PERSON INTERVIEWED</b><br>MALE.....1<br>FEMALE.....2 |                                      |
| NAME _____                                                                                                                                                                                                                             |                                    |                                    |                                    |                                                                      |                                 |                                                                     |                                      |
| MOBILE PHONE NUMBER _____                                                                                                                                                                                                              |                                    |                                    |                                    |                                                                      |                                 |                                                                     |                                      |
| <b>SUPERVISOR</b>                                                                                                                                                                                                                      |                                    | <b>OFFICE EDITOR</b>               |                                    |                                                                      | <b>KEYED BY</b>                 |                                                                     |                                      |
| NAME.....                                                                                                                                                                                                                              |                                    | NAME.....                          |                                    |                                                                      | NAME.....                       |                                                                     |                                      |
| CODE: [ ] [ ]                                                                                                                                                                                                                          |                                    | CODE: [ ] [ ]                      |                                    |                                                                      | CODE: [ ] [ ]                   |                                                                     |                                      |
| DATE [ _ / _ / 17 ]<br>DD MM YY                                                                                                                                                                                                        |                                    | DATE [ _ / _ / 17 ]<br>DD MM YY    |                                    |                                                                      | DATE [ _ / _ / 17 ]<br>DD MM YY |                                                                     |                                      |

| GENERAL FACILITY INFORMATION |                                                                                                                                                                                                                                                                                                  |                                                                                                                                                                                                          |            |
|------------------------------|--------------------------------------------------------------------------------------------------------------------------------------------------------------------------------------------------------------------------------------------------------------------------------------------------|----------------------------------------------------------------------------------------------------------------------------------------------------------------------------------------------------------|------------|
| Source                       | Questions                                                                                                                                                                                                                                                                                        | Coding                                                                                                                                                                                                   | Skip/Notes |
| Q1.                          | RECORD THE TIME<br>(IN 24 HOUR FORMAT) Hour ..... <input type="text"/> <input type="text"/> Minutes ..... <input type="text"/> <input type="text"/>                                                                                                                                              |                                                                                                                                                                                                          |            |
| Q2.                          | In what year did this facility open?<br><br><b>PROBE, IF RESPONDANT SAYS DON'T KNOW: THIS IS VERY IMPORTANT.</b> Can you tell me how old this facility is? For example, would you say it is about 3 years old? 7 years old? (etc.)<br><br><b>FILL IN EITHER YEAR OPENED <u>OR</u> YEARS OLD.</b> | Year opened ..... <input type="text"/> <input type="text"/> <input type="text"/> <input type="text"/><br><b>OR</b><br>Years old ..... <input type="text"/> <input type="text"/><br>Don't know ..... 9998 |            |
| Q3.                          | On average, how many days per week is the facility open?                                                                                                                                                                                                                                         | Days per week. .... <input type="text"/>                                                                                                                                                                 |            |
| Q4.                          | What time does the facility typically open?<br><br>WRITE ANSWER ON 24-HOUR CLOCK (IE. IF OPENS AT 7:00 AM, MARK 07:00)                                                                                                                                                                           | <input type="text"/> <input type="text"/> : <input type="text"/> <input type="text"/><br>Open 24 hours a day.....99:91 →                                                                                 | Q6a        |
| Q5.                          | What time does the facility typically close?<br><br>WRITE ANSWER ON 24-HOUR CLOCK (IE. IF CLOSES AT 7:00 PM, MARK 19:00)                                                                                                                                                                         | <input type="text"/> <input type="text"/> : <input type="text"/> <input type="text"/>                                                                                                                    |            |
| Q6a.                         | Is this facility linked with PPFN or SFH or another organization that provides family planning methods and materials at a discounted rate or for free?                                                                                                                                           | Yes.....1<br>No.....2 →<br>Don't know.....8 →                                                                                                                                                            | Q7<br>Q7   |
|                              | 6b. What is the name of this organization?                                                                                                                                                                                                                                                       | 6c.What year did this facility begin to associate with each organization named?                                                                                                                          |            |
|                              | 1.                                                                                                                                                                                                                                                                                               | Year ..... <input type="text"/> <input type="text"/> <input type="text"/> <input type="text"/><br>Don't know.....9998                                                                                    |            |
|                              | 2.                                                                                                                                                                                                                                                                                               | Year ..... <input type="text"/> <input type="text"/> <input type="text"/> <input type="text"/><br>Don't know.....9998                                                                                    |            |
|                              | 3.                                                                                                                                                                                                                                                                                               | Year ..... <input type="text"/> <input type="text"/> <input type="text"/> <input type="text"/><br>Don't know.....9998                                                                                    |            |
|                              | 4                                                                                                                                                                                                                                                                                                | Year ..... <input type="text"/> <input type="text"/> <input type="text"/> <input type="text"/><br>Don't know.....9998                                                                                    |            |
| Q7                           | Was there renovation done in this facility in the last five years?                                                                                                                                                                                                                               | Yes.....1<br>No.....2 →<br>Don't know.....8 →                                                                                                                                                            | Q8a<br>Q8a |
| Q8                           | What kinds of renovation?<br><br>MULTIPLE RESPONSES POSSIBLE                                                                                                                                                                                                                                     | NURHI 72 hours makeover (PLAQUE OBSERVED)..... A<br>NURHI 72 hours makeover (PLAQUE NOT OBSERVED)..... B<br>CRUFFY..... C<br>Other _____ X<br>Renovation types _____ X<br>(Specify)                      |            |

|     |                                                                                                                                                                                                                                                                                                                                                                                                                                                                                                                                                                                           |                                                                                                                                                                                                                                                                                                                                                                                     |             |                      |
|-----|-------------------------------------------------------------------------------------------------------------------------------------------------------------------------------------------------------------------------------------------------------------------------------------------------------------------------------------------------------------------------------------------------------------------------------------------------------------------------------------------------------------------------------------------------------------------------------------------|-------------------------------------------------------------------------------------------------------------------------------------------------------------------------------------------------------------------------------------------------------------------------------------------------------------------------------------------------------------------------------------|-------------|----------------------|
| Q8a | Has this facility ever participated in a Whole Site Orientation?                                                                                                                                                                                                                                                                                                                                                                                                                                                                                                                          | YES.....1<br>NO.....2<br>DON'T KNOW.....8                                                                                                                                                                                                                                                                                                                                           | →<br>→      | Q9<br>Q9             |
| Q8b | When was the last Whole Site Orientation?                                                                                                                                                                                                                                                                                                                                                                                                                                                                                                                                                 | 2017.....1<br>2016.....2<br>2015.....3<br>2014.....4<br>2013.....5<br>2012.....6<br>BEFORE 2012.....7<br>DON'T KNOW.....8                                                                                                                                                                                                                                                           |             |                      |
| Q8c | Which organization coordinated the Whole Site Orientation?<br><br>MULTIPLE RESPONSES POSSIBLE                                                                                                                                                                                                                                                                                                                                                                                                                                                                                             | NURHI.....A<br>MOH.....B<br>MARIE STOPES.....C<br>PPFN.....D<br>SFH.....E<br>OTHER.....X                                                                                                                                                                                                                                                                                            |             |                      |
| Q9. | How many <b>permanent</b> staff of each type (cadre) does this facility have?<br><br>1. Obstetrician/Gynecologists (OB/GYN)<br>2. General surgeons<br>3. Pediatricians<br>4. General physicians<br>5. Theatre nurse<br>6. Nurse/Midwives<br>7. Nurses<br>8. Midwives<br>9. Community health extension workers (CHEWs)<br>10. Community health officers (CHO)<br>11. VCT Counsellor<br><br><b>FOR LARGE MEDICAL HOSPITALS AND COLLEGES, PLEASE PROBE TO ESTIMATE TO YOUR BEST ABILITY.</b><br><b>*NOTE: PERMANENT STAFF DOES NOT INCLUDE DOCTORS IN RESIDENCY TRAINING INTERNS OR NYSC</b> | OB/GYNS [ ] [ ] [ ] [ ]<br><br>GENERAL SURGEONS [ ] [ ] [ ] [ ]<br><br>PEDIATRICIANS [ ] [ ] [ ] [ ]<br><br>GENERAL PHYSICIANS [ ] [ ] [ ] [ ]<br><br>THEATRE NURSES [ ] [ ] [ ] [ ]<br><br>NURSE/MIDWIVES [ ] [ ] [ ] [ ]<br><br>NURSES [ ] [ ] [ ] [ ]<br><br>MIDWIVES [ ] [ ] [ ] [ ]<br><br>CHEW [ ] [ ] [ ] [ ]<br><br>CHO [ ] [ ] [ ] [ ]<br><br>VCT PROVIDER [ ] [ ] [ ] [ ] |             |                      |
| Q9a | Would you say that a year ago, the facility's staffing capacity to provide FP services was: understaffed, properly staffed or over-staffed?                                                                                                                                                                                                                                                                                                                                                                                                                                               | UNDERSTAFFED.....1<br>PROPERLY STAFFED.....2<br>OVER-STAFFED.....3<br>DON'T KNOW.....8                                                                                                                                                                                                                                                                                              |             |                      |
| Q9b | Would you say that currently the facility's staffing capacity to provide FP services was: understaffed, properly staffed or over-staffed?                                                                                                                                                                                                                                                                                                                                                                                                                                                 | UNDERSTAFFED.....1<br>PROPERLY STAFFED.....2<br>OVER-STAFFED.....3<br>DON'T KNOW.....8                                                                                                                                                                                                                                                                                              | →<br>→<br>→ | Q10a<br>Q10a<br>Q10a |
| Q9c | How many position vacancies of each type (cadre) that provide FP services does this facility have?<br><br>1. Obstetrician/Gynecologists (OB/GYN)<br>2. General surgeons<br>3. Pediatricians<br>4. General physicians<br>5. Theatre nurse<br>6. Nurse/Midwives<br>7. Nurses<br>8. Midwives<br>9. Community health extension workers (CHEWs)<br>10. Community health officers (CHO)<br>11. VCT Counsellor                                                                                                                                                                                   | OB/GYNS [ ] [ ] [ ] [ ]<br>GENERAL SURGEONS [ ] [ ] [ ] [ ]<br>PEDIATRICIANS [ ] [ ] [ ] [ ]<br>GENERAL PHYSICIANS [ ] [ ] [ ] [ ]<br>THEATRE NURSES [ ] [ ] [ ] [ ]<br>NURSE/MIDWIVES [ ] [ ] [ ] [ ]<br>NURSES [ ] [ ] [ ] [ ]<br>MIDWIVES [ ] [ ] [ ] [ ]<br>CHEW [ ] [ ] [ ] [ ]<br>CHO [ ] [ ] [ ] [ ]<br>VCT PROVIDER [ ] [ ] [ ] [ ]<br><br>DON'T KNOW..... 998              |             |                      |

Now I would like to ask you some questions about the permanent staff who work in this facility. We would like to ask their names, positions and departments, so that we can randomly sample a few to interview using a separate questionnaire. These few will then represent the group. Remember that this is for research purposes only and we will keep all details strictly confidential.

| STAFF                                                                                                                                                                                                                                                                                                                                                                                                                                                                                                                                                                                                         |            |                                                                      |                                                             |                           |                                           |                            |                               |                                   |                                   |                                   |
|---------------------------------------------------------------------------------------------------------------------------------------------------------------------------------------------------------------------------------------------------------------------------------------------------------------------------------------------------------------------------------------------------------------------------------------------------------------------------------------------------------------------------------------------------------------------------------------------------------------|------------|----------------------------------------------------------------------|-------------------------------------------------------------|---------------------------|-------------------------------------------|----------------------------|-------------------------------|-----------------------------------|-----------------------------------|-----------------------------------|
| LIST NAMES OF ALL PERMANENT STAFF INVOLVED IN PROVIDING REPRODUCTIVE HEALTH SERVICES, INCLUDING FAMILY PLANNING, MATERNAL AND CHILD HEALTH AND STI/VCT/HIV SERVICES. CODE "YES" IN Q10c FOR THOSE PROVIDERS ON DUTY TODAY AND "NO" FOR THOSE NOT ON DUTY AT ANY TIME TODAY. FOR EACH PERMANENT SERVICE PROVIDER WHO IS <b>NOT</b> ON DUTY TODAY, WRITE "999" (NOT ELIGIBLE) IN <b>Q10d</b> . FOR ALL PERMANENT SERVICE PROVIDERS WHO <b>ARE</b> ON DUTY TODAY, ASSIGN A NUMBER TO EACH OF THEM (SERIALIZE) IN Q10d STARTING WITH "01" TO THE LAST NUMBER. DO NOT CONSIDER THE "999" AS PART OF THE NUMBERING. |            |                                                                      |                                                             |                           |                                           |                            |                               |                                   |                                   |                                   |
| FOR FACILITIES WITH FOUR OR FEWER PROVIDERS ON DUTY TODAY, INTERVIEW ALL OF THEM. FOR FACILITIES WITH FIVE OR MORE PROVIDERS ON DUTY TODAY, WRITE ALL NUMBERS FROM Q10d (EXCEPT FOR "999") ON SMALL PIECES OF PAPER AND RANDOMLY SELECT FOUR PROVIDERS. ONCE YOU HAVE BALLOTTED/SELECTED FOUR PROVIDERS FROM Q10d, CAREFULLY AND NEATLY CIRCLE THE NUMBERS IN Q10d FOR THOSE SELECTED.                                                                                                                                                                                                                        |            |                                                                      |                                                             |                           |                                           |                            |                               |                                   |                                   |                                   |
| Q10a.<br>No. of<br>staff                                                                                                                                                                                                                                                                                                                                                                                                                                                                                                                                                                                      | Q10b. NAME | Q10c. Is<br>NAME<br>scheduled to<br>be on duty<br>any time<br>today? | Q10d.<br>Serial<br>number of<br>sampled<br>on-duty<br>staff | Q10e.<br>POSITION<br>CODE | Q10f. Does<br>NAME<br>work full-<br>time? | Q10g. SEX                  | Does NAME provide service(s)? |                                   |                                   |                                   |
|                                                                                                                                                                                                                                                                                                                                                                                                                                                                                                                                                                                                               |            |                                                                      |                                                             |                           |                                           |                            | Q10h.<br>FAMILY<br>PLANNING   | Q10i.<br>MATERNAL<br>HEALTH       | Q10j.<br>CHILD<br>HEALTH          | Q10k.<br>VCT/STI/HIV<br>SERVICES  |
| (01)                                                                                                                                                                                                                                                                                                                                                                                                                                                                                                                                                                                                          |            | YES . . . . 1<br>NO . . . . 2                                        | <input type="text"/>                                        | <input type="text"/>      | YES . . . 1<br>NO . . . 2                 | MALE . . . 1<br>FEMALE...2 | YES . . . . 1<br>NO . . . . 2 | YES . . . . . 1<br>NO . . . . . 2 | YES . . . . . 1<br>NO . . . . . 2 | YES . . . . . 1<br>NO . . . . . 2 |
| (02)                                                                                                                                                                                                                                                                                                                                                                                                                                                                                                                                                                                                          |            | YES . . . . 1<br>NO . . . . 2                                        | <input type="text"/>                                        | <input type="text"/>      | YES . . . 1<br>NO . . . 2                 | MALE . . . 1<br>FEMALE...2 | YES . . . . 1<br>NO . . . . 2 | YES . . . . . 1<br>NO . . . . . 2 | YES . . . . . 1<br>NO . . . . . 2 | YES . . . . . 1<br>NO . . . . . 2 |
| (03)                                                                                                                                                                                                                                                                                                                                                                                                                                                                                                                                                                                                          |            | YES . . . . 1<br>NO . . . . 2                                        | <input type="text"/>                                        | <input type="text"/>      | YES . . . 1<br>NO . . . 2                 | MALE . . . 1<br>FEMALE...2 | YES . . . . 1<br>NO . . . . 2 | YES . . . . . 1<br>NO . . . . . 2 | YES . . . . . 1<br>NO . . . . . 2 | YES . . . . . 1<br>NO . . . . . 2 |
| (04)                                                                                                                                                                                                                                                                                                                                                                                                                                                                                                                                                                                                          |            | YES . . . . 1<br>NO . . . . 2                                        | <input type="text"/>                                        | <input type="text"/>      | YES . . . 1<br>NO . . . 2                 | MALE . . . 1<br>FEMALE...2 | YES . . . . 1<br>NO . . . . 2 | YES . . . . . 1<br>NO . . . . . 2 | YES . . . . . 1<br>NO . . . . . 2 | YES . . . . . 1<br>NO . . . . . 2 |
| (05)                                                                                                                                                                                                                                                                                                                                                                                                                                                                                                                                                                                                          |            | YES . . . . 1<br>NO . . . . 2                                        | <input type="text"/>                                        | <input type="text"/>      | YES . . . 1<br>NO . . . 2                 | MALE . . . 1<br>FEMALE...2 | YES . . . . 1<br>NO . . . . 2 | YES . . . . . 1<br>NO . . . . . 2 | YES . . . . . 1<br>NO . . . . . 2 | YES . . . . . 1<br>NO . . . . . 2 |
| (06)                                                                                                                                                                                                                                                                                                                                                                                                                                                                                                                                                                                                          |            | YES . . . . 1<br>NO . . . . 2                                        | <input type="text"/>                                        | <input type="text"/>      | YES . . . 1<br>NO . . . 2                 | MALE . . . 1<br>FEMALE...2 | YES . . . . 1<br>NO . . . . 2 | YES . . . . . 1<br>NO . . . . . 2 | YES . . . . . 1<br>NO . . . . . 2 | YES . . . . . 1<br>NO . . . . . 2 |
| (07)                                                                                                                                                                                                                                                                                                                                                                                                                                                                                                                                                                                                          |            | YES . . . . 1<br>NO . . . . 2                                        | <input type="text"/>                                        | <input type="text"/>      | YES . . . 1<br>NO . . . 2                 | MALE . . . 1<br>FEMALE...2 | YES . . . . 1<br>NO . . . . 2 | YES . . . . . 1<br>NO . . . . . 2 | YES . . . . . 1<br>NO . . . . . 2 | YES . . . . . 1<br>NO . . . . . 2 |
| (08)                                                                                                                                                                                                                                                                                                                                                                                                                                                                                                                                                                                                          |            | YES . . . . 1<br>NO . . . . 2                                        | <input type="text"/>                                        | <input type="text"/>      | YES . . . 1<br>NO . . . 2                 | MALE . . . 1<br>FEMALE...2 | YES . . . . 1<br>NO . . . . 2 | YES . . . . . 1<br>NO . . . . . 2 | YES . . . . . 1<br>NO . . . . . 2 | YES . . . . . 1<br>NO . . . . . 2 |
| (09)                                                                                                                                                                                                                                                                                                                                                                                                                                                                                                                                                                                                          |            | YES . . . . 1<br>NO . . . . 2                                        | <input type="text"/>                                        | <input type="text"/>      | YES . . . 1<br>NO . . . 2                 | MALE . . . 1<br>FEMALE...2 | YES . . . . 1<br>NO . . . . 2 | YES . . . . . 1<br>NO . . . . . 2 | YES . . . . . 1<br>NO . . . . . 2 | YES . . . . . 1<br>NO . . . . . 2 |
| (10)                                                                                                                                                                                                                                                                                                                                                                                                                                                                                                                                                                                                          |            | YES . . . . 1<br>NO . . . . 2                                        | <input type="text"/>                                        | <input type="text"/>      | YES . . . 1<br>NO . . . 2                 | MALE . . . 1<br>FEMALE...2 | YES . . . . 1<br>NO . . . . 2 | YES . . . . . 1<br>NO . . . . . 2 | YES . . . . . 1<br>NO . . . . . 2 | YES . . . . . 1<br>NO . . . . . 2 |
| (11)                                                                                                                                                                                                                                                                                                                                                                                                                                                                                                                                                                                                          |            | YES . . . . 1<br>NO . . . . 2                                        | <input type="text"/>                                        | <input type="text"/>      | YES . . . 1<br>NO . . . 2                 | MALE . . . 1<br>FEMALE...2 | YES . . . . 1<br>NO . . . . 2 | YES . . . . . 1<br>NO . . . . . 2 | YES . . . . . 1<br>NO . . . . . 2 | YES . . . . . 1<br>NO . . . . . 2 |
| (12)                                                                                                                                                                                                                                                                                                                                                                                                                                                                                                                                                                                                          |            | YES . . . . 1<br>NO . . . . 2                                        | <input type="text"/>                                        | <input type="text"/>      | YES . . . 1<br>NO . . . 2                 | MALE . . . 1<br>FEMALE...2 | YES . . . . 1<br>NO . . . . 2 | YES . . . . . 1<br>NO . . . . . 2 | YES . . . . . 1<br>NO . . . . . 2 | YES . . . . . 1<br>NO . . . . . 2 |
| (13)                                                                                                                                                                                                                                                                                                                                                                                                                                                                                                                                                                                                          |            | YES . . . . 1<br>NO . . . . 2                                        | <input type="text"/>                                        | <input type="text"/>      | YES . . . 1<br>NO . . . 2                 | MALE . . . 1<br>FEMALE...2 | YES . . . . 1<br>NO . . . . 2 | YES . . . . . 1<br>NO . . . . . 2 | YES . . . . . 1<br>NO . . . . . 2 | YES . . . . . 1<br>NO . . . . . 2 |
| (14)                                                                                                                                                                                                                                                                                                                                                                                                                                                                                                                                                                                                          |            | YES . . . . 1<br>NO . . . . 2                                        | <input type="text"/>                                        | <input type="text"/>      | YES . . . 1<br>NO . . . 2                 | MALE . . . 1<br>FEMALE...2 | YES . . . . 1<br>NO . . . . 2 | YES . . . . . 1<br>NO . . . . . 2 | YES . . . . . 1<br>NO . . . . . 2 | YES . . . . . 1<br>NO . . . . . 2 |

|                                     |                       |                   |             |                                    |                   |
|-------------------------------------|-----------------------|-------------------|-------------|------------------------------------|-------------------|
| CODE: Obstetrician/Gynecologists=01 | Pediatricians=03      | Theatre nurse=05  | Nurses=07   | CHEWs=09                           | VCT Counselors=11 |
| General surgeons=02                 | General physicians=04 | Nurse/Midwives=06 | Midwives=08 | Community health officers (CHO)=10 | Other=96          |

| STAFF                    |            |                                                                   |                                                                |                                           |                                       |                            |                                 |                                   |                                   |                                   |
|--------------------------|------------|-------------------------------------------------------------------|----------------------------------------------------------------|-------------------------------------------|---------------------------------------|----------------------------|---------------------------------|-----------------------------------|-----------------------------------|-----------------------------------|
| Q10a.<br>No. of<br>staff | Q10b. NAME | Q10c. Is<br>NAME<br>scheduled to<br>be on duty any<br>time today? | Q10d.<br>Serial<br>number of<br>sampled<br>on-duty<br>staff    | Q10e.<br>POSITION<br>CODE                 | Q10f. Does<br>NAME work<br>full-time? | Q10g. SEX                  | Does NAME provide service(s)?   |                                   |                                   |                                   |
|                          |            |                                                                   |                                                                |                                           |                                       |                            | Q10h.<br>FAMILY<br>PLANNING     | Q10i.<br>MATERNAL<br>HEALTH       | Q10j.<br>CHILD<br>HEALTH          | Q10k.<br>VCT/STI/HIV<br>SERVICES  |
| (15)                     |            | YES . . . . 1<br>NO . . . . . 2                                   | <input type="text"/> <input type="text"/> <input type="text"/> | <input type="text"/> <input type="text"/> | YES . . . 1<br>NO . . . . 2           | MALE . . . 1<br>FEMALE...2 | YES . . . . 1<br>NO . . . . . 2 | YES . . . . . 1<br>NO . . . . . 2 | YES . . . . . 1<br>NO . . . . . 2 | YES . . . . . 1<br>NO . . . . . 2 |
| (16)                     |            | YES . . . . 1<br>NO . . . . . 2                                   | <input type="text"/> <input type="text"/> <input type="text"/> | <input type="text"/> <input type="text"/> | YES . . . 1<br>NO . . . . 2           | MALE . . . 1<br>FEMALE...2 | YES . . . . 1<br>NO . . . . . 2 | YES . . . . . 1<br>NO . . . . . 2 | YES . . . . . 1<br>NO . . . . . 2 | YES . . . . . 1<br>NO . . . . . 2 |
| (17)                     |            | YES . . . . 1<br>NO . . . . . 2                                   | <input type="text"/> <input type="text"/> <input type="text"/> | <input type="text"/> <input type="text"/> | YES . . . 1<br>NO . . . . 2           | MALE . . . 1<br>FEMALE...2 | YES . . . . 1<br>NO . . . . . 2 | YES . . . . . 1<br>NO . . . . . 2 | YES . . . . . 1<br>NO . . . . . 2 | YES . . . . . 1<br>NO . . . . . 2 |
| (18)                     |            | YES . . . . 1<br>NO . . . . . 2                                   | <input type="text"/> <input type="text"/> <input type="text"/> | <input type="text"/> <input type="text"/> | YES . . . 1<br>NO . . . . 2           | MALE . . . 1<br>FEMALE...2 | YES . . . . 1<br>NO . . . . . 2 | YES . . . . . 1<br>NO . . . . . 2 | YES . . . . . 1<br>NO . . . . . 2 | YES . . . . . 1<br>NO . . . . . 2 |
| (19)                     |            | YES . . . . 1<br>NO . . . . . 2                                   | <input type="text"/> <input type="text"/> <input type="text"/> | <input type="text"/> <input type="text"/> | YES . . . 1<br>NO . . . . 2           | MALE . . . 1<br>FEMALE...2 | YES . . . . 1<br>NO . . . . . 2 | YES . . . . . 1<br>NO . . . . . 2 | YES . . . . . 1<br>NO . . . . . 2 | YES . . . . . 1<br>NO . . . . . 2 |
| (20)                     |            | YES . . . . 1<br>NO . . . . . 2                                   | <input type="text"/> <input type="text"/> <input type="text"/> | <input type="text"/> <input type="text"/> | YES . . . 1<br>NO . . . . 2           | MALE . . . 1<br>FEMALE...2 | YES . . . . 1<br>NO . . . . . 2 | YES . . . . . 1<br>NO . . . . . 2 | YES . . . . . 1<br>NO . . . . . 2 | YES . . . . . 1<br>NO . . . . . 2 |
| (21)                     |            | YES . . . . 1<br>NO . . . . . 2                                   | <input type="text"/> <input type="text"/> <input type="text"/> | <input type="text"/> <input type="text"/> | YES . . . 1<br>NO . . . . 2           | MALE . . . 1<br>FEMALE...2 | YES . . . . 1<br>NO . . . . . 2 | YES . . . . . 1<br>NO . . . . . 2 | YES . . . . . 1<br>NO . . . . . 2 | YES . . . . . 1<br>NO . . . . . 2 |
| (22)                     |            | YES . . . . 1<br>NO . . . . . 2                                   | <input type="text"/> <input type="text"/> <input type="text"/> | <input type="text"/> <input type="text"/> | YES . . . 1<br>NO . . . . 2           | MALE . . . 1<br>FEMALE...2 | YES . . . . 1<br>NO . . . . . 2 | YES . . . . . 1<br>NO . . . . . 2 | YES . . . . . 1<br>NO . . . . . 2 | YES . . . . . 1<br>NO . . . . . 2 |
| (23)                     |            | YES . . . . 1<br>NO . . . . . 2                                   | <input type="text"/> <input type="text"/> <input type="text"/> | <input type="text"/> <input type="text"/> | YES . . . 1<br>NO . . . . 2           | MALE . . . 1<br>FEMALE...2 | YES . . . . 1<br>NO . . . . . 2 | YES . . . . . 1<br>NO . . . . . 2 | YES . . . . . 1<br>NO . . . . . 2 | YES . . . . . 1<br>NO . . . . . 2 |
| (24)                     |            | YES . . . . 1<br>NO . . . . . 2                                   | <input type="text"/> <input type="text"/> <input type="text"/> | <input type="text"/> <input type="text"/> | YES . . . 1<br>NO . . . . 2           | MALE . . . 1<br>FEMALE...2 | YES . . . . 1<br>NO . . . . . 2 | YES . . . . . 1<br>NO . . . . . 2 | YES . . . . . 1<br>NO . . . . . 2 | YES . . . . . 1<br>NO . . . . . 2 |
| (25)                     |            | YES . . . . 1<br>NO . . . . . 2                                   | <input type="text"/> <input type="text"/> <input type="text"/> | <input type="text"/> <input type="text"/> | YES . . . 1<br>NO . . . . 2           | MALE . . . 1<br>FEMALE...2 | YES . . . . 1<br>NO . . . . . 2 | YES . . . . . 1<br>NO . . . . . 2 | YES . . . . . 1<br>NO . . . . . 2 | YES . . . . . 1<br>NO . . . . . 2 |
| (26)                     |            | YES . . . . 1<br>NO . . . . . 2                                   | <input type="text"/> <input type="text"/> <input type="text"/> | <input type="text"/> <input type="text"/> | YES . . . 1<br>NO . . . . 2           | MALE . . . 1<br>FEMALE...2 | YES . . . . 1<br>NO . . . . . 2 | YES . . . . . 1<br>NO . . . . . 2 | YES . . . . . 1<br>NO . . . . . 2 | YES . . . . . 1<br>NO . . . . . 2 |
| (27)                     |            | YES . . . . 1<br>NO . . . . . 2                                   | <input type="text"/> <input type="text"/> <input type="text"/> | <input type="text"/> <input type="text"/> | YES . . . 1<br>NO . . . . 2           | MALE . . . 1<br>FEMALE...2 | YES . . . . 1<br>NO . . . . . 2 | YES . . . . . 1<br>NO . . . . . 2 | YES . . . . . 1<br>NO . . . . . 2 | YES . . . . . 1<br>NO . . . . . 2 |
| (28)                     |            | YES . . . . 1<br>NO . . . . . 2                                   | <input type="text"/> <input type="text"/> <input type="text"/> | <input type="text"/> <input type="text"/> | YES . . . 1<br>NO . . . . 2           | MALE . . . 1<br>FEMALE...2 | YES . . . . 1<br>NO . . . . . 2 | YES . . . . . 1<br>NO . . . . . 2 | YES . . . . . 1<br>NO . . . . . 2 | YES . . . . . 1<br>NO . . . . . 2 |
| (29)                     |            | YES . . . . 1<br>NO . . . . . 2                                   | <input type="text"/> <input type="text"/> <input type="text"/> | <input type="text"/> <input type="text"/> | YES . . . 1<br>NO . . . . 2           | MALE . . . 1<br>FEMALE...2 | YES . . . . 1<br>NO . . . . . 2 | YES . . . . . 1<br>NO . . . . . 2 | YES . . . . . 1<br>NO . . . . . 2 | YES . . . . . 1<br>NO . . . . . 2 |
| (30)                     |            | YES . . . . 1<br>NO . . . . . 2                                   | <input type="text"/> <input type="text"/> <input type="text"/> | <input type="text"/> <input type="text"/> | YES . . . 1<br>NO . . . . 2           | MALE . . . 1<br>FEMALE...2 | YES . . . . 1<br>NO . . . . . 2 | YES . . . . . 1<br>NO . . . . . 2 | YES . . . . . 1<br>NO . . . . . 2 | YES . . . . . 1<br>NO . . . . . 2 |
| (31)                     |            | YES . . . . 1<br>NO . . . . . 2                                   | <input type="text"/> <input type="text"/> <input type="text"/> | <input type="text"/> <input type="text"/> | YES . . . 1<br>NO . . . . 2           | MALE . . . 1<br>FEMALE...2 | YES . . . . 1<br>NO . . . . . 2 | YES . . . . . 1<br>NO . . . . . 2 | YES . . . . . 1<br>NO . . . . . 2 | YES . . . . . 1<br>NO . . . . . 2 |
| (32)                     |            | YES . . . . 1<br>NO . . . . . 2                                   | <input type="text"/> <input type="text"/> <input type="text"/> | <input type="text"/> <input type="text"/> | YES . . . 1<br>NO . . . . 2           | MALE . . . 1<br>FEMALE...2 | YES . . . . 1<br>NO . . . . . 2 | YES . . . . . 1<br>NO . . . . . 2 | YES . . . . . 1<br>NO . . . . . 2 | YES . . . . . 1<br>NO . . . . . 2 |
| (33)                     |            | YES . . . . 1<br>NO . . . . . 2                                   | <input type="text"/> <input type="text"/> <input type="text"/> | <input type="text"/> <input type="text"/> | YES . . . 1<br>NO . . . . 2           | MALE . . . 1<br>FEMALE...2 | YES . . . . 1<br>NO . . . . . 2 | YES . . . . . 1<br>NO . . . . . 2 | YES . . . . . 1<br>NO . . . . . 2 | YES . . . . . 1<br>NO . . . . . 2 |

CODE: Obstetrician/Gynecologists=01      Pediatricians=03      Theatre nurse=05      Nurses=07      CHEWs=09      VCT Counselors=11  
 General surgeons=02      General physicians=04      Nurse/Midwives=06      Midwives=08      Community health officers (CHO)=10      Other=96

| STAFF                    |            |                                                                   |                                                                            |                                                   |                                       |                            |                                 |                                   |                                   |                                   |
|--------------------------|------------|-------------------------------------------------------------------|----------------------------------------------------------------------------|---------------------------------------------------|---------------------------------------|----------------------------|---------------------------------|-----------------------------------|-----------------------------------|-----------------------------------|
| Q10a.<br>No. of<br>staff | Q10b. NAME | Q10c. Is<br>NAME<br>scheduled to<br>be on duty any<br>time today? | Q10d.<br>Serial<br>number of<br>sampled<br>on-duty<br>staff                | Q10e.<br>POSITION<br>CODE                         | Q10f. Does<br>NAME work<br>full-time? | Q10g. SEX                  | Does NAME provide service(s)?   |                                   |                                   |                                   |
|                          |            |                                                                   |                                                                            |                                                   |                                       |                            | Q10h.<br>FAMILY<br>PLANNING     | Q10i.<br>MATERNAL<br>HEALTH       | Q10j.<br>CHILD<br>HEALTH          | Q10k.<br>VCT/STI/HIV<br>SERVICES  |
| (34)                     |            | YES . . . . 1<br>NO . . . . . 2                                   | <input type="checkbox"/> <input type="checkbox"/> <input type="checkbox"/> | <input type="checkbox"/> <input type="checkbox"/> | YES . . . 1<br>NO . . . . 2           | MALE . . . 1<br>FEMALE...2 | YES . . . . 1<br>NO . . . . . 2 | YES . . . . . 1<br>NO . . . . . 2 | YES . . . . . 1<br>NO . . . . . 2 | YES . . . . . 1<br>NO . . . . . 2 |
| (35)                     |            | YES . . . . 1<br>NO . . . . . 2                                   | <input type="checkbox"/> <input type="checkbox"/> <input type="checkbox"/> | <input type="checkbox"/> <input type="checkbox"/> | YES . . . 1<br>NO . . . . 2           | MALE . . . 1<br>FEMALE...2 | YES . . . . 1<br>NO . . . . . 2 | YES . . . . . 1<br>NO . . . . . 2 | YES . . . . . 1<br>NO . . . . . 2 | YES . . . . . 1<br>NO . . . . . 2 |
| (36)                     |            | YES . . . . 1<br>NO . . . . . 2                                   | <input type="checkbox"/> <input type="checkbox"/> <input type="checkbox"/> | <input type="checkbox"/> <input type="checkbox"/> | YES . . . 1<br>NO . . . . 2           | MALE . . . 1<br>FEMALE...2 | YES . . . . 1<br>NO . . . . . 2 | YES . . . . . 1<br>NO . . . . . 2 | YES . . . . . 1<br>NO . . . . . 2 | YES . . . . . 1<br>NO . . . . . 2 |
| (37)                     |            | YES . . . . 1<br>NO . . . . . 2                                   | <input type="checkbox"/> <input type="checkbox"/> <input type="checkbox"/> | <input type="checkbox"/> <input type="checkbox"/> | YES . . . 1<br>NO . . . . 2           | MALE . . . 1<br>FEMALE...2 | YES . . . . 1<br>NO . . . . . 2 | YES . . . . . 1<br>NO . . . . . 2 | YES . . . . . 1<br>NO . . . . . 2 | YES . . . . . 1<br>NO . . . . . 2 |
| (38)                     |            | YES . . . . 1<br>NO . . . . . 2                                   | <input type="checkbox"/> <input type="checkbox"/> <input type="checkbox"/> | <input type="checkbox"/> <input type="checkbox"/> | YES . . . 1<br>NO . . . . 2           | MALE . . . 1<br>FEMALE...2 | YES . . . . 1<br>NO . . . . . 2 | YES . . . . . 1<br>NO . . . . . 2 | YES . . . . . 1<br>NO . . . . . 2 | YES . . . . . 1<br>NO . . . . . 2 |
| (39)                     |            | YES . . . . 1<br>NO . . . . . 2                                   | <input type="checkbox"/> <input type="checkbox"/> <input type="checkbox"/> | <input type="checkbox"/> <input type="checkbox"/> | YES . . . 1<br>NO . . . . 2           | MALE . . . 1<br>FEMALE...2 | YES . . . . 1<br>NO . . . . . 2 | YES . . . . . 1<br>NO . . . . . 2 | YES . . . . . 1<br>NO . . . . . 2 | YES . . . . . 1<br>NO . . . . . 2 |
| (40)                     |            | YES . . . . 1<br>NO . . . . . 2                                   | <input type="checkbox"/> <input type="checkbox"/> <input type="checkbox"/> | <input type="checkbox"/> <input type="checkbox"/> | YES . . . 1<br>NO . . . . 2           | MALE . . . 1<br>FEMALE...2 | YES . . . . 1<br>NO . . . . . 2 | YES . . . . . 1<br>NO . . . . . 2 | YES . . . . . 1<br>NO . . . . . 2 | YES . . . . . 1<br>NO . . . . . 2 |
| (41)                     |            | YES . . . . 1<br>NO . . . . . 2                                   | <input type="checkbox"/> <input type="checkbox"/> <input type="checkbox"/> | <input type="checkbox"/> <input type="checkbox"/> | YES . . . 1<br>NO . . . . 2           | MALE . . . 1<br>FEMALE...2 | YES . . . . 1<br>NO . . . . . 2 | YES . . . . . 1<br>NO . . . . . 2 | YES . . . . . 1<br>NO . . . . . 2 | YES . . . . . 1<br>NO . . . . . 2 |
| (42)                     |            | YES . . . . 1<br>NO . . . . . 2                                   | <input type="checkbox"/> <input type="checkbox"/> <input type="checkbox"/> | <input type="checkbox"/> <input type="checkbox"/> | YES . . . 1<br>NO . . . . 2           | MALE . . . 1<br>FEMALE...2 | YES . . . . 1<br>NO . . . . . 2 | YES . . . . . 1<br>NO . . . . . 2 | YES . . . . . 1<br>NO . . . . . 2 | YES . . . . . 1<br>NO . . . . . 2 |
| (43)                     |            | YES . . . . 1<br>NO . . . . . 2                                   | <input type="checkbox"/> <input type="checkbox"/> <input type="checkbox"/> | <input type="checkbox"/> <input type="checkbox"/> | YES . . . 1<br>NO . . . . 2           | MALE . . . 1<br>FEMALE...2 | YES . . . . 1<br>NO . . . . . 2 | YES . . . . . 1<br>NO . . . . . 2 | YES . . . . . 1<br>NO . . . . . 2 | YES . . . . . 1<br>NO . . . . . 2 |
| (44)                     |            | YES . . . . 1<br>NO . . . . . 2                                   | <input type="checkbox"/> <input type="checkbox"/> <input type="checkbox"/> | <input type="checkbox"/> <input type="checkbox"/> | YES . . . 1<br>NO . . . . 2           | MALE . . . 1<br>FEMALE...2 | YES . . . . 1<br>NO . . . . . 2 | YES . . . . . 1<br>NO . . . . . 2 | YES . . . . . 1<br>NO . . . . . 2 | YES . . . . . 1<br>NO . . . . . 2 |
| (45)                     |            | YES . . . . 1<br>NO . . . . . 2                                   | <input type="checkbox"/> <input type="checkbox"/> <input type="checkbox"/> | <input type="checkbox"/> <input type="checkbox"/> | YES . . . 1<br>NO . . . . 2           | MALE . . . 1<br>FEMALE...2 | YES . . . . 1<br>NO . . . . . 2 | YES . . . . . 1<br>NO . . . . . 2 | YES . . . . . 1<br>NO . . . . . 2 | YES . . . . . 1<br>NO . . . . . 2 |
| (46)                     |            | YES . . . . 1<br>NO . . . . . 2                                   | <input type="checkbox"/> <input type="checkbox"/> <input type="checkbox"/> | <input type="checkbox"/> <input type="checkbox"/> | YES . . . 1<br>NO . . . . 2           | MALE . . . 1<br>FEMALE...2 | YES . . . . 1<br>NO . . . . . 2 | YES . . . . . 1<br>NO . . . . . 2 | YES . . . . . 1<br>NO . . . . . 2 | YES . . . . . 1<br>NO . . . . . 2 |
| (47)                     |            | YES . . . . 1<br>NO . . . . . 2                                   | <input type="checkbox"/> <input type="checkbox"/> <input type="checkbox"/> | <input type="checkbox"/> <input type="checkbox"/> | YES . . . 1<br>NO . . . . 2           | MALE . . . 1<br>FEMALE...2 | YES . . . . 1<br>NO . . . . . 2 | YES . . . . . 1<br>NO . . . . . 2 | YES . . . . . 1<br>NO . . . . . 2 | YES . . . . . 1<br>NO . . . . . 2 |
| (48)                     |            | YES . . . . 1<br>NO . . . . . 2                                   | <input type="checkbox"/> <input type="checkbox"/> <input type="checkbox"/> | <input type="checkbox"/> <input type="checkbox"/> | YES . . . 1<br>NO . . . . 2           | MALE . . . 1<br>FEMALE...2 | YES . . . . 1<br>NO . . . . . 2 | YES . . . . . 1<br>NO . . . . . 2 | YES . . . . . 1<br>NO . . . . . 2 | YES . . . . . 1<br>NO . . . . . 2 |
| (49)                     |            | YES . . . . 1<br>NO . . . . . 2                                   | <input type="checkbox"/> <input type="checkbox"/> <input type="checkbox"/> | <input type="checkbox"/> <input type="checkbox"/> | YES . . . 1<br>NO . . . . 2           | MALE . . . 1<br>FEMALE...2 | YES . . . . 1<br>NO . . . . . 2 | YES . . . . . 1<br>NO . . . . . 2 | YES . . . . . 1<br>NO . . . . . 2 | YES . . . . . 1<br>NO . . . . . 2 |
| (50)                     |            | YES . . . . 1<br>NO . . . . . 2                                   | <input type="checkbox"/> <input type="checkbox"/> <input type="checkbox"/> | <input type="checkbox"/> <input type="checkbox"/> | YES . . . 1<br>NO . . . . 2           | MALE . . . 1<br>FEMALE...2 | YES . . . . 1<br>NO . . . . . 2 | YES . . . . . 1<br>NO . . . . . 2 | YES . . . . . 1<br>NO . . . . . 2 | YES . . . . . 1<br>NO . . . . . 2 |
| (51)                     |            | YES . . . . 1<br>NO . . . . . 2                                   | <input type="checkbox"/> <input type="checkbox"/> <input type="checkbox"/> | <input type="checkbox"/> <input type="checkbox"/> | YES . . . 1<br>NO . . . . 2           | MALE . . . 1<br>FEMALE...2 | YES . . . . 1<br>NO . . . . . 2 | YES . . . . . 1<br>NO . . . . . 2 | YES . . . . . 1<br>NO . . . . . 2 | YES . . . . . 1<br>NO . . . . . 2 |
| (52)                     |            | YES . . . . 1<br>NO . . . . . 2                                   | <input type="checkbox"/> <input type="checkbox"/> <input type="checkbox"/> | <input type="checkbox"/> <input type="checkbox"/> | YES . . . 1<br>NO . . . . 2           | MALE . . . 1<br>FEMALE...2 | YES . . . . 1<br>NO . . . . . 2 | YES . . . . . 1<br>NO . . . . . 2 | YES . . . . . 1<br>NO . . . . . 2 | YES . . . . . 1<br>NO . . . . . 2 |

CODE: Obstetrician/Gynecologists=01      Pediatricians=03      Theatre nurse=05      Nurses=07      CHEWs=09      VCT Counselors=11  
 General surgeons=02      General physicians=04      Nurse/Midwives=06      Midwives=08      Community health officers (CHO)=10      Other=96

| STAFF                    |            |                                                                   |                                                             |                           |                                       |                            |                                 |                                   |                                   |                                   |
|--------------------------|------------|-------------------------------------------------------------------|-------------------------------------------------------------|---------------------------|---------------------------------------|----------------------------|---------------------------------|-----------------------------------|-----------------------------------|-----------------------------------|
| Q10a.<br>No. of<br>staff | Q10b. NAME | Q10c. Is<br>NAME<br>scheduled to<br>be on duty any<br>time today? | Q10d.<br>Serial<br>number of<br>sampled<br>on-duty<br>staff | Q10e.<br>POSITION<br>CODE | Q10f. Does<br>NAME work<br>full-time? | Q10g. SEX                  | Does NAME provide service(s)?   |                                   |                                   |                                   |
|                          |            |                                                                   |                                                             |                           |                                       |                            | Q10h.<br>FAMILY<br>PLANNING     | Q10i.<br>MATERNAL<br>HEALTH       | Q10j.<br>CHILD<br>HEALTH          | Q10k.<br>VCT/STI/HIV<br>SERVICES  |
| (53)                     |            | YES . . . . 1<br>NO . . . . . 2                                   | <input type="text"/>                                        | <input type="text"/>      | YES . . . 1<br>NO . . . . 2           | MALE . . . 1<br>FEMALE...2 | YES . . . . 1<br>NO . . . . . 2 | YES . . . . . 1<br>NO . . . . . 2 | YES . . . . . 1<br>NO . . . . . 2 | YES . . . . . 1<br>NO . . . . . 2 |
| (54)                     |            | YES . . . . 1<br>NO . . . . . 2                                   | <input type="text"/>                                        | <input type="text"/>      | YES . . . 1<br>NO . . . . 2           | MALE . . . 1<br>FEMALE...2 | YES . . . . 1<br>NO . . . . . 2 | YES . . . . . 1<br>NO . . . . . 2 | YES . . . . . 1<br>NO . . . . . 2 | YES . . . . . 1<br>NO . . . . . 2 |
| (55)                     |            | YES . . . . 1<br>NO . . . . . 2                                   | <input type="text"/>                                        | <input type="text"/>      | YES . . . 1<br>NO . . . . 2           | MALE . . . 1<br>FEMALE...2 | YES . . . . 1<br>NO . . . . . 2 | YES . . . . . 1<br>NO . . . . . 2 | YES . . . . . 1<br>NO . . . . . 2 | YES . . . . . 1<br>NO . . . . . 2 |
| (56)                     |            | YES . . . . 1<br>NO . . . . . 2                                   | <input type="text"/>                                        | <input type="text"/>      | YES . . . 1<br>NO . . . . 2           | MALE . . . 1<br>FEMALE...2 | YES . . . . 1<br>NO . . . . . 2 | YES . . . . . 1<br>NO . . . . . 2 | YES . . . . . 1<br>NO . . . . . 2 | YES . . . . . 1<br>NO . . . . . 2 |
| (57)                     |            | YES . . . . 1<br>NO . . . . . 2                                   | <input type="text"/>                                        | <input type="text"/>      | YES . . . 1<br>NO . . . . 2           | MALE . . . 1<br>FEMALE...2 | YES . . . . 1<br>NO . . . . . 2 | YES . . . . . 1<br>NO . . . . . 2 | YES . . . . . 1<br>NO . . . . . 2 | YES . . . . . 1<br>NO . . . . . 2 |
| (58)                     |            | YES . . . . 1<br>NO . . . . . 2                                   | <input type="text"/>                                        | <input type="text"/>      | YES . . . 1<br>NO . . . . 2           | MALE . . . 1<br>FEMALE...2 | YES . . . . 1<br>NO . . . . . 2 | YES . . . . . 1<br>NO . . . . . 2 | YES . . . . . 1<br>NO . . . . . 2 | YES . . . . . 1<br>NO . . . . . 2 |
| (59)                     |            | YES . . . . 1<br>NO . . . . . 2                                   | <input type="text"/>                                        | <input type="text"/>      | YES . . . 1<br>NO . . . . 2           | MALE . . . 1<br>FEMALE...2 | YES . . . . 1<br>NO . . . . . 2 | YES . . . . . 1<br>NO . . . . . 2 | YES . . . . . 1<br>NO . . . . . 2 | YES . . . . . 1<br>NO . . . . . 2 |
| (60)                     |            | YES . . . . 1<br>NO . . . . . 2                                   | <input type="text"/>                                        | <input type="text"/>      | YES . . . 1<br>NO . . . . 2           | MALE . . . 1<br>FEMALE...2 | YES . . . . 1<br>NO . . . . . 2 | YES . . . . . 1<br>NO . . . . . 2 | YES . . . . . 1<br>NO . . . . . 2 | YES . . . . . 1<br>NO . . . . . 2 |
| (61)                     |            | YES . . . . 1<br>NO . . . . . 2                                   | <input type="text"/>                                        | <input type="text"/>      | YES . . . 1<br>NO . . . . 2           | MALE . . . 1<br>FEMALE...2 | YES . . . . 1<br>NO . . . . . 2 | YES . . . . . 1<br>NO . . . . . 2 | YES . . . . . 1<br>NO . . . . . 2 | YES . . . . . 1<br>NO . . . . . 2 |
| (62)                     |            | YES . . . . 1<br>NO . . . . . 2                                   | <input type="text"/>                                        | <input type="text"/>      | YES . . . 1<br>NO . . . . 2           | MALE . . . 1<br>FEMALE...2 | YES . . . . 1<br>NO . . . . . 2 | YES . . . . . 1<br>NO . . . . . 2 | YES . . . . . 1<br>NO . . . . . 2 | YES . . . . . 1<br>NO . . . . . 2 |
| (63)                     |            | YES . . . . 1<br>NO . . . . . 2                                   | <input type="text"/>                                        | <input type="text"/>      | YES . . . 1<br>NO . . . . 2           | MALE . . . 1<br>FEMALE...2 | YES . . . . 1<br>NO . . . . . 2 | YES . . . . . 1<br>NO . . . . . 2 | YES . . . . . 1<br>NO . . . . . 2 | YES . . . . . 1<br>NO . . . . . 2 |
| (64)                     |            | YES . . . . 1<br>NO . . . . . 2                                   | <input type="text"/>                                        | <input type="text"/>      | YES . . . 1<br>NO . . . . 2           | MALE . . . 1<br>FEMALE...2 | YES . . . . 1<br>NO . . . . . 2 | YES . . . . . 1<br>NO . . . . . 2 | YES . . . . . 1<br>NO . . . . . 2 | YES . . . . . 1<br>NO . . . . . 2 |
| (65)                     |            | YES . . . . 1<br>NO . . . . . 2                                   | <input type="text"/>                                        | <input type="text"/>      | YES . . . 1<br>NO . . . . 2           | MALE . . . 1<br>FEMALE...2 | YES . . . . 1<br>NO . . . . . 2 | YES . . . . . 1<br>NO . . . . . 2 | YES . . . . . 1<br>NO . . . . . 2 | YES . . . . . 1<br>NO . . . . . 2 |
| (66)                     |            | YES . . . . 1<br>NO . . . . . 2                                   | <input type="text"/>                                        | <input type="text"/>      | YES . . . 1<br>NO . . . . 2           | MALE . . . 1<br>FEMALE...2 | YES . . . . 1<br>NO . . . . . 2 | YES . . . . . 1<br>NO . . . . . 2 | YES . . . . . 1<br>NO . . . . . 2 | YES . . . . . 1<br>NO . . . . . 2 |
| (67)                     |            | YES . . . . 1<br>NO . . . . . 2                                   | <input type="text"/>                                        | <input type="text"/>      | YES . . . 1<br>NO . . . . 2           | MALE . . . 1<br>FEMALE...2 | YES . . . . 1<br>NO . . . . . 2 | YES . . . . . 1<br>NO . . . . . 2 | YES . . . . . 1<br>NO . . . . . 2 | YES . . . . . 1<br>NO . . . . . 2 |
| (68)                     |            | YES . . . . 1<br>NO . . . . . 2                                   | <input type="text"/>                                        | <input type="text"/>      | YES . . . 1<br>NO . . . . 2           | MALE . . . 1<br>FEMALE...2 | YES . . . . 1<br>NO . . . . . 2 | YES . . . . . 1<br>NO . . . . . 2 | YES . . . . . 1<br>NO . . . . . 2 | YES . . . . . 1<br>NO . . . . . 2 |
| (69)                     |            | YES . . . . 1<br>NO . . . . . 2                                   | <input type="text"/>                                        | <input type="text"/>      | YES . . . 1<br>NO . . . . 2           | MALE . . . 1<br>FEMALE...2 | YES . . . . 1<br>NO . . . . . 2 | YES . . . . . 1<br>NO . . . . . 2 | YES . . . . . 1<br>NO . . . . . 2 | YES . . . . . 1<br>NO . . . . . 2 |
| (70)                     |            | YES . . . . 1<br>NO . . . . . 2                                   | <input type="text"/>                                        | <input type="text"/>      | YES . . . 1<br>NO . . . . 2           | MALE . . . 1<br>FEMALE...2 | YES . . . . 1<br>NO . . . . . 2 | YES . . . . . 1<br>NO . . . . . 2 | YES . . . . . 1<br>NO . . . . . 2 | YES . . . . . 1<br>NO . . . . . 2 |
| (71)                     |            | YES . . . . 1<br>NO . . . . . 2                                   | <input type="text"/>                                        | <input type="text"/>      | YES . . . 1<br>NO . . . . 2           | MALE . . . 1<br>FEMALE...2 | YES . . . . 1<br>NO . . . . . 2 | YES . . . . . 1<br>NO . . . . . 2 | YES . . . . . 1<br>NO . . . . . 2 | YES . . . . . 1<br>NO . . . . . 2 |

CODE: Obstetrician/Gynecologists=01      Pediatricians=03      Theatre nurse=05      Nurses=07      CHEWs=09      VCT Counselors=11  
 General surgeons=02      General physicians=04      Nurse/Midwives=06      Midwives=08      Community health officers (CHO)=10      Other=96



| STAFF                                                                                                                                                 |            |                                                                   |                                                                            |                                                   |                                       |                            |                                 |                                    |                                   |                                   |
|-------------------------------------------------------------------------------------------------------------------------------------------------------|------------|-------------------------------------------------------------------|----------------------------------------------------------------------------|---------------------------------------------------|---------------------------------------|----------------------------|---------------------------------|------------------------------------|-----------------------------------|-----------------------------------|
| Q10a.<br>No. of<br>staff                                                                                                                              | Q10b. NAME | Q10c. Is<br>NAME<br>scheduled to<br>be on duty any<br>time today? | Q10d.<br>Serial<br>number of<br>sampled<br>on-duty<br>staff                | Q10e.<br>POSITION<br>CODE                         | Q10f. Does<br>NAME work<br>full-time? | Q10g. SEX                  | Does NAME provide service(s)?   |                                    |                                   |                                   |
|                                                                                                                                                       |            |                                                                   |                                                                            |                                                   |                                       |                            | Q10h.<br>FAMILY<br>PLANNING     | Q10i.<br>MATERNAL<br>HEALTH        | Q10j.<br>CHILD<br>HEALTH          | Q10k.<br>VCT/STI/HIV<br>SERVICES  |
| (72)                                                                                                                                                  |            | YES . . . . 1<br>NO . . . . . 2                                   | <input type="checkbox"/> <input type="checkbox"/> <input type="checkbox"/> | <input type="checkbox"/> <input type="checkbox"/> | YES . . . 1<br>NO . . . . 2           | MALE . . . 1<br>FEMALE...2 | YES . . . . 1<br>NO . . . . . 2 | YES . . . . . 1<br>NO . . . . . 2  | YES . . . . . 1<br>NO . . . . . 2 | YES . . . . . 1<br>NO . . . . . 2 |
| (73)                                                                                                                                                  |            | YES . . . . 1<br>NO . . . . . 2                                   | <input type="checkbox"/> <input type="checkbox"/> <input type="checkbox"/> | <input type="checkbox"/> <input type="checkbox"/> | YES . . . 1<br>NO . . . . 2           | MALE . . . 1<br>FEMALE...2 | YES . . . . 1<br>NO . . . . . 2 | YES . . . . . 1<br>NO . . . . . 2  | YES . . . . . 1<br>NO . . . . . 2 | YES . . . . . 1<br>NO . . . . . 2 |
| (74)                                                                                                                                                  |            | YES . . . . 1<br>NO . . . . . 2                                   | <input type="checkbox"/> <input type="checkbox"/> <input type="checkbox"/> | <input type="checkbox"/> <input type="checkbox"/> | YES . . . 1<br>NO . . . . 2           | MALE . . . 1<br>FEMALE...2 | YES . . . . 1<br>NO . . . . . 2 | YES . . . . . 1<br>NO . . . . . 2  | YES . . . . . 1<br>NO . . . . . 2 | YES . . . . . 1<br>NO . . . . . 2 |
| (75)                                                                                                                                                  |            | YES . . . . 1<br>NO . . . . . 2                                   | <input type="checkbox"/> <input type="checkbox"/> <input type="checkbox"/> | <input type="checkbox"/> <input type="checkbox"/> | YES . . . 1<br>NO . . . . 2           | MALE . . . 1<br>FEMALE...2 | YES . . . . 1<br>NO . . . . . 2 | YES . . . . . 1<br>NO . . . . . 2  | YES . . . . . 1<br>NO . . . . . 2 | YES . . . . . 1<br>NO . . . . . 2 |
| (76)                                                                                                                                                  |            | YES . . . . 1<br>NO . . . . . 2                                   | <input type="checkbox"/> <input type="checkbox"/> <input type="checkbox"/> | <input type="checkbox"/> <input type="checkbox"/> | YES . . . 1<br>NO . . . . 2           | MALE . . . 1<br>FEMALE...2 | YES . . . . 1<br>NO . . . . . 2 | YES . . . . . 1<br>NO . . . . . 2  | YES . . . . . 1<br>NO . . . . . 2 | YES . . . . . 1<br>NO . . . . . 2 |
| (77)                                                                                                                                                  |            | YES . . . . 1<br>NO . . . . . 2                                   | <input type="checkbox"/> <input type="checkbox"/> <input type="checkbox"/> | <input type="checkbox"/> <input type="checkbox"/> | YES . . . 1<br>NO . . . . 2           | MALE . . . 1<br>FEMALE...2 | YES . . . . 1<br>NO . . . . . 2 | YES . . . . . 1<br>NO . . . . . 2  | YES . . . . . 1<br>NO . . . . . 2 | YES . . . . . 1<br>NO . . . . . 2 |
| (78)                                                                                                                                                  |            | YES . . . . 1<br>NO . . . . . 2                                   | <input type="checkbox"/> <input type="checkbox"/> <input type="checkbox"/> | <input type="checkbox"/> <input type="checkbox"/> | YES . . . 1<br>NO . . . . 2           | MALE . . . 1<br>FEMALE...2 | YES . . . . 1<br>NO . . . . . 2 | YES . . . . . 1<br>NO . . . . . 2  | YES . . . . . 1<br>NO . . . . . 2 | YES . . . . . 1<br>NO . . . . . 2 |
| (79)                                                                                                                                                  |            | YES . . . . 1<br>NO . . . . . 2                                   | <input type="checkbox"/> <input type="checkbox"/> <input type="checkbox"/> | <input type="checkbox"/> <input type="checkbox"/> | YES . . . 1<br>NO . . . . 2           | MALE . . . 1<br>FEMALE...2 | YES . . . . 1<br>NO . . . . . 2 | YES . . . . . 1<br>NO . . . . . 2  | YES . . . . . 1<br>NO . . . . . 2 | YES . . . . . 1<br>NO . . . . . 2 |
| (80)                                                                                                                                                  |            | YES . . . . 1<br>NO . . . . . 2                                   | <input type="checkbox"/> <input type="checkbox"/> <input type="checkbox"/> | <input type="checkbox"/> <input type="checkbox"/> | YES . . . 1<br>NO . . . . 2           | MALE . . . 1<br>FEMALE...2 | YES . . . . 1<br>NO . . . . . 2 | YES . . . . . 1<br>NO . . . . . 2  | YES . . . . . 1<br>NO . . . . . 2 | YES . . . . . 1<br>NO . . . . . 2 |
| (81)                                                                                                                                                  |            | YES . . . . 1<br>NO . . . . . 2                                   | <input type="checkbox"/> <input type="checkbox"/> <input type="checkbox"/> | <input type="checkbox"/> <input type="checkbox"/> | YES . . . 1<br>NO . . . . 2           | MALE . . . 1<br>FEMALE...2 | YES . . . . 1<br>NO . . . . . 2 | YES . . . . . 1<br>NO . . . . . 2  | YES . . . . . 1<br>NO . . . . . 2 | YES . . . . . 1<br>NO . . . . . 2 |
| (82)                                                                                                                                                  |            | YES . . . . 1<br>NO . . . . . 2                                   | <input type="checkbox"/> <input type="checkbox"/> <input type="checkbox"/> | <input type="checkbox"/> <input type="checkbox"/> | YES . . . 1<br>NO . . . . 2           | MALE . . . 1<br>FEMALE...2 | YES . . . . 1<br>NO . . . . . 2 | YES . . . . . 1<br>NO . . . . . 2  | YES . . . . . 1<br>NO . . . . . 2 | YES . . . . . 1<br>NO . . . . . 2 |
| (83)                                                                                                                                                  |            | YES . . . . 1<br>NO . . . . . 2                                   | <input type="checkbox"/> <input type="checkbox"/> <input type="checkbox"/> | <input type="checkbox"/> <input type="checkbox"/> | YES . . . 1<br>NO . . . . 2           | MALE . . . 1<br>FEMALE...2 | YES . . . . 1<br>NO . . . . . 2 | YES . . . . . 1<br>NO . . . . . 2  | YES . . . . . 1<br>NO . . . . . 2 | YES . . . . . 1<br>NO . . . . . 2 |
| (84)                                                                                                                                                  |            | YES . . . . 1<br>NO . . . . . 2                                   | <input type="checkbox"/> <input type="checkbox"/> <input type="checkbox"/> | <input type="checkbox"/> <input type="checkbox"/> | YES . . . 1<br>NO . . . . 2           | MALE . . . 1<br>FEMALE...2 | YES . . . . 1<br>NO . . . . . 2 | YES . . . . . 1<br>NO . . . . . 2  | YES . . . . . 1<br>NO . . . . . 2 | YES . . . . . 1<br>NO . . . . . 2 |
| (85)                                                                                                                                                  |            | YES . . . . 1<br>NO . . . . . 2                                   | <input type="checkbox"/> <input type="checkbox"/> <input type="checkbox"/> | <input type="checkbox"/> <input type="checkbox"/> | YES . . . 1<br>NO . . . . 2           | MALE . . . 1<br>FEMALE...2 | YES . . . . 1<br>NO . . . . . 2 | YES . . . . . 1<br>NO . . . . . 2  | YES . . . . . 1<br>NO . . . . . 2 | YES . . . . . 1<br>NO . . . . . 2 |
| (86)                                                                                                                                                  |            | YES . . . . 1<br>NO . . . . . 2                                   | <input type="checkbox"/> <input type="checkbox"/> <input type="checkbox"/> | <input type="checkbox"/> <input type="checkbox"/> | YES . . . 1<br>NO . . . . 2           | MALE . . . 1<br>FEMALE...2 | YES . . . . 1<br>NO . . . . . 2 | YES . . . . . 1<br>NO . . . . . 2  | YES . . . . . 1<br>NO . . . . . 2 | YES . . . . . 1<br>NO . . . . . 2 |
| (87)                                                                                                                                                  |            | YES . . . . 1<br>NO . . . . . 2                                   | <input type="checkbox"/> <input type="checkbox"/> <input type="checkbox"/> | <input type="checkbox"/> <input type="checkbox"/> | YES . . . 1<br>NO . . . . 2           | MALE . . . 1<br>FEMALE...2 | YES . . . . 1<br>NO . . . . . 2 | YES . . . . . 1<br>NO . . . . . 2  | YES . . . . . 1<br>NO . . . . . 2 | YES . . . . . 1<br>NO . . . . . 2 |
| (88)                                                                                                                                                  |            | YES . . . . 1<br>NO . . . . . 2                                   | <input type="checkbox"/> <input type="checkbox"/> <input type="checkbox"/> | <input type="checkbox"/> <input type="checkbox"/> | YES . . . 1<br>NO . . . . 2           | MALE . . . 1<br>FEMALE...2 | YES . . . . 1<br>NO . . . . . 2 | YES . . . . . 1<br>NO . . . . . 2  | YES . . . . . 1<br>NO . . . . . 2 | YES . . . . . 1<br>NO . . . . . 2 |
| CODE: Obstetrician/Gynecologists=01                                                                                                                   |            | Pediatricians=03                                                  |                                                                            | Theatre nurse=05                                  |                                       | Nurses=07                  |                                 | CHEWs=09                           |                                   | VCT Counselors=11                 |
| General surgeons=02                                                                                                                                   |            | General physicians=04                                             |                                                                            | Nurse/Midwives=06                                 |                                       | Midwives=08                |                                 | Community health officers (CHO)=10 |                                   | Other=96                          |
| CHECK THE BOX IF ANOTHER FORM IS USED: <input type="checkbox"/> TOTAL NUMBER OF FORMS: <input type="checkbox"/> FORM NUMBER: <input type="checkbox"/> |            |                                                                   |                                                                            |                                                   |                                       |                            |                                 |                                    |                                   |                                   |

| <b>GENERAL MCH AND FP</b>                                                                  |                                                                                    |                                                    |                                                                                                                                                                |                                                  |
|--------------------------------------------------------------------------------------------|------------------------------------------------------------------------------------|----------------------------------------------------|----------------------------------------------------------------------------------------------------------------------------------------------------------------|--------------------------------------------------|
| SERVICE                                                                                    | Q11a. Does this facility provide the following Maternal and Child Health SERVICES? | Q11b. How many days per week is SERVICE available? | Q11c. How many clients received this service here in the past 3 months? ASK TO SEE MEDICAL RECORD SYSTEM, IF POSSIBLE. OTHERWISE, ASK RESPONDENT TO RECALL.    | Q11d. WHAT WAS THE SOURCE OF THIS INFORMATION?   |
| (1) Maternity care/delivery services                                                       | Yes . . . . 1<br>No . . . . . 2 → <b>(2)</b>                                       | Days . . . <input type="checkbox"/>                | <input type="checkbox"/> <input type="checkbox"/> <input type="checkbox"/> <input type="checkbox"/> <input type="checkbox"/><br><b>NOT AVAILABLE.....99993</b> | OBSERVED RECORD.....1<br>PROVIDER ESTIMATE.....2 |
| (2) Counseling on initiating breast-feeding (after delivery)                               | Yes . . . . 1<br>No . . . . . 2                                                    |                                                    |                                                                                                                                                                |                                                  |
| (3) Emergency care for prolonged or obstructed labor (cesarean section, blood transfusion) | Yes . . . . 1<br>No . . . . . 2 → <b>(4)</b>                                       | Days . . . <input type="checkbox"/>                | <input type="checkbox"/> <input type="checkbox"/> <input type="checkbox"/> <input type="checkbox"/> <input type="checkbox"/><br><b>NOT AVAILABLE.....99993</b> | OBSERVED RECORD.....1<br>PROVIDER ESTIMATE.....2 |
| (4) Consultation for infertility                                                           | Yes . . . . 1<br>No . . . . . 2 → <b>(5)</b>                                       | Days . . . <input type="checkbox"/>                | <input type="checkbox"/> <input type="checkbox"/> <input type="checkbox"/> <input type="checkbox"/> <input type="checkbox"/><br><b>NOT AVAILABLE.....99993</b> | OBSERVED RECORD.....1<br>PROVIDER ESTIMATE.....2 |
| (5) Post-abortion care                                                                     | Yes . . . . 1<br>No . . . . . 2 → <b>(6)</b>                                       | Days . . . <input type="checkbox"/>                | <input type="checkbox"/> <input type="checkbox"/> <input type="checkbox"/> <input type="checkbox"/> <input type="checkbox"/><br><b>NOT AVAILABLE.....99993</b> | OBSERVED RECORD.....1<br>PROVIDER ESTIMATE.....2 |
| (6) Ante-natal care                                                                        | Yes . . . . 1<br>No . . . . . 2 → <b>(12)</b>                                      | Days . . . <input type="checkbox"/>                | <input type="checkbox"/> <input type="checkbox"/> <input type="checkbox"/> <input type="checkbox"/> <input type="checkbox"/><br><b>NOT AVAILABLE.....99993</b> | OBSERVED RECORD.....1<br>PROVIDER ESTIMATE.....2 |
| (7) Complete Regimen of Tetanus Toxoid immunization during pregnancy (5 doses)             | Yes . . . . 1<br>No . . . . . 2                                                    |                                                    |                                                                                                                                                                |                                                  |
| (8) Syphilis screening during pregnancy                                                    | Yes . . . . 1<br>No . . . . . 2                                                    |                                                    |                                                                                                                                                                |                                                  |
| (9) Iron supplementation during pregnancy                                                  | Yes . . . . 1<br>No . . . . . 2                                                    |                                                    |                                                                                                                                                                |                                                  |
| (10) Intermittent preventive treatment for malaria (IPT)                                   | Yes . . . . 1<br>No . . . . . 2                                                    |                                                    |                                                                                                                                                                |                                                  |
| (11) Nutrition counseling during pregnancy                                                 | Yes . . . . 1<br>No . . . . . 2                                                    |                                                    |                                                                                                                                                                |                                                  |

| SERVICE                                                                | Q11a. Does this facility provide the following Maternal and Child Health SERVICE? | Q11b. How many days per week is SERVICE available? | Q11c. How many clients received this service here in the past 3 months? ASK TO SEE MEDICAL RECORD SYSTEM, IF POSSIBLE. OTHERWISE, ASK RESPONDENT TO RECALL.    | Q11d. WHAT WAS THE SOURCE OF THIS INFORMATION?   |
|------------------------------------------------------------------------|-----------------------------------------------------------------------------------|----------------------------------------------------|----------------------------------------------------------------------------------------------------------------------------------------------------------------|--------------------------------------------------|
| (12) Post natal care                                                   | Yes . . . . 1<br>No . . . . 2 → (14)                                              | Days . . . <input type="checkbox"/>                | <input type="checkbox"/> <input type="checkbox"/> <input type="checkbox"/> <input type="checkbox"/> <input type="checkbox"/><br><b>NOT AVAILABLE.....99993</b> | OBSERVED RECORD.....1<br>PROVIDER ESTIMATE.....2 |
| (13) Vitamin A supplementation after pregnancy                         | Yes . . . . 1<br>No . . . . 2                                                     |                                                    |                                                                                                                                                                |                                                  |
| (14) Child immunization                                                | Yes . . . . 1<br>No . . . . 2 → (15)                                              | Days . . . <input type="checkbox"/>                | <input type="checkbox"/> <input type="checkbox"/> <input type="checkbox"/> <input type="checkbox"/> <input type="checkbox"/><br><b>NOT AVAILABLE.....99993</b> | OBSERVED RECORD.....1<br>PROVIDER ESTIMATE.....2 |
| (15) Child growth monitoring                                           | Yes . . . . 1<br>No . . . . 2 → (16)                                              | Days . . . <input type="checkbox"/>                | <input type="checkbox"/> <input type="checkbox"/> <input type="checkbox"/> <input type="checkbox"/> <input type="checkbox"/><br><b>NOT AVAILABLE.....99993</b> | OBSERVED RECORD.....1<br>PROVIDER ESTIMATE.....2 |
| (16) Child respiratory disease                                         | Yes . . . . 1<br>No . . . . 2 → (17)                                              | Days . . . <input type="checkbox"/>                | <input type="checkbox"/> <input type="checkbox"/> <input type="checkbox"/> <input type="checkbox"/> <input type="checkbox"/><br><b>NOT AVAILABLE.....99993</b> | OBSERVED RECORD.....1<br>PROVIDER ESTIMATE.....2 |
| (17) Oral rehydration therapy services                                 | Yes . . . . 1<br>No . . . . 2 → (18)                                              | Days . . . <input type="checkbox"/>                | <input type="checkbox"/> <input type="checkbox"/> <input type="checkbox"/> <input type="checkbox"/> <input type="checkbox"/><br><b>NOT AVAILABLE.....99993</b> | OBSERVED RECORD.....1<br>PROVIDER ESTIMATE.....2 |
| (18) Detection and treatment of sexually transmitted infections (STIs) | Yes . . . . 1<br>No . . . . 2 → (19)                                              | Days . . . <input type="checkbox"/>                | <input type="checkbox"/> <input type="checkbox"/> <input type="checkbox"/> <input type="checkbox"/> <input type="checkbox"/><br><b>NOT AVAILABLE.....99993</b> | OBSERVED RECORD.....1<br>PROVIDER ESTIMATE.....2 |
| (19) Voluntary counseling and testing (VCT)                            | Yes . . . . 1<br>No . . . . 2 → (20)                                              | Days . . . <input type="checkbox"/>                | <input type="checkbox"/> <input type="checkbox"/> <input type="checkbox"/> <input type="checkbox"/> <input type="checkbox"/><br><b>NOT AVAILABLE.....99993</b> | OBSERVED RECORD.....1<br>PROVIDER ESTIMATE.....2 |
| (20) PMTCT                                                             | Yes . . . . 1<br>No . . . . 2 → (21)                                              | Days . . . <input type="checkbox"/>                | <input type="checkbox"/> <input type="checkbox"/> <input type="checkbox"/> <input type="checkbox"/> <input type="checkbox"/><br><b>NOT AVAILABLE.....99993</b> | OBSERVED RECORD.....1<br>PROVIDER ESTIMATE.....2 |
| (21) HIV/AIDS Management                                               | Yes . . . . 1<br>No . . . . 2 → (22)                                              | Days . . . <input type="checkbox"/>                | <input type="checkbox"/> <input type="checkbox"/> <input type="checkbox"/> <input type="checkbox"/> <input type="checkbox"/><br><b>NOT AVAILABLE.....99993</b> | OBSERVED RECORD.....1<br>PROVIDER ESTIMATE.....2 |
| (22) Family planning counseling & services                             | Yes . . . . 1<br>No . . . . 2 → (Q13)                                             | Days . . . <input type="checkbox"/>                | <input type="checkbox"/> <input type="checkbox"/> <input type="checkbox"/> <input type="checkbox"/> <input type="checkbox"/><br><b>NOT AVAILABLE.....99993</b> | OBSERVED RECORD.....1<br>PROVIDER ESTIMATE.....2 |

|      |                                                                                                                                                                       |                                                                                                                                                                                                                                                                                                                                                                                                         |       |
|------|-----------------------------------------------------------------------------------------------------------------------------------------------------------------------|---------------------------------------------------------------------------------------------------------------------------------------------------------------------------------------------------------------------------------------------------------------------------------------------------------------------------------------------------------------------------------------------------------|-------|
| Q12. | Approximately, what percentage of the clients who received family planning counseling and services in the past 3 months were between the ages of 15 and 19 years old? | <input type="text"/> <input type="text"/> <input type="text"/><br>NONE.....000<br>DON'T KNOW....998                                                                                                                                                                                                                                                                                                     |       |
| Q13. | Does this facility ever refer clients to other health care facilities?                                                                                                | Yes ..... 1<br>No ..... 2                                                                                                                                                                                                                                                                                                                                                                               | → Q15 |
| Q14. | For which services are these referrals?<br><br>[MULTIPLE RESPONSE POSSIBLE]                                                                                           | FAMILY PLANNING.....A<br>IMMUNIZATION.....B<br>ANTENATAL CARE.....C<br>DELIVERY CARE.....D<br>EMERGENCY DELIVERY CARE (C-SECTION).....E<br>POSTNATAL CARE.....F<br>DISEASE PREVENTION.....G<br>TREATMENT OF ADULT.....H<br>TREATMENT FOR CHILD.....I<br>GROWTH MONITORING OF CHILD.....J<br>HEALTH CHECK-UP .....K<br>VCT.....L<br>HIV/AIDS MANAGEMENT.....M<br>PMTCT.....N<br>OTHER.....X<br>(SPECIFY) |       |

Now I would like to ask you some questions about other health services.

|      |                                                                                                                |                          |                                                                 |       |
|------|----------------------------------------------------------------------------------------------------------------|--------------------------|-----------------------------------------------------------------|-------|
| Q15. | CHECK Q11A. IF YES TO (14) CHILD IMMUNIZATION, (15) CHILD GROWTH MONITORING, OR (16) CHILD RESPIRATORY DISEASE | <input type="checkbox"/> | IF NO TO ALL CHILD SERVICES (14-16)<br><input type="checkbox"/> | → Q19 |
|------|----------------------------------------------------------------------------------------------------------------|--------------------------|-----------------------------------------------------------------|-------|

|      |                                                                                                                                                                                                                                                                                                 |                                                                                                                                                                                                                                                                                                                                                                                   |  |
|------|-------------------------------------------------------------------------------------------------------------------------------------------------------------------------------------------------------------------------------------------------------------------------------------------------|-----------------------------------------------------------------------------------------------------------------------------------------------------------------------------------------------------------------------------------------------------------------------------------------------------------------------------------------------------------------------------------|--|
| Q16. | What is the normal practice for this facility if a woman who has come for a <b>child health visit</b> is interested in <b>receiving information</b> on FP? Is she able to receive this information on the day of her visit, or is she asked to come back on a different day?<br><br>CIRCLE ONE. | Always receive on same day.....01<br>Sometimes receive on same day.....02<br>Make appointment to come back a different day....03<br>No appointment made, always told to come back different day.....04<br>Given referral to another facility.....05<br>Given no information or referral.....06<br>Do not offer family planning services.....07 → Q19<br>Other.....96<br>(SPECIFY) |  |
| Q17. | If a woman who has come for a <b>child health visit</b> is interested in <b>receiving a hormonal method of FP</b> , what is the normal practice for this facility?<br><br>CIRCLE ONE.                                                                                                           | Always receive on same day.....01<br>Sometimes receive on same day.....02<br>Make appointment to come back a different day....03<br>No appointment made, always told to come back different day.....04<br>Given referral to another facility.....05<br>Given no information or referral.....06<br>Other.....96<br>(SPECIFY)                                                       |  |
| Q18. | If a woman who has come for a <b>child health visit</b> is interested in <b>getting sterilized</b> , what is the normal practice for this facility?<br><br>CIRCLE ONE.                                                                                                                          | Procedure can happen on same day.....01<br>Sometimes the procedure can happen on same day.....02<br>Make appointment to come back a different day....03<br>No appointment made, always told to come back different day.....04<br>Given referral to another facility.....05<br>Given no information or referral.....06<br>Other.....96<br>(SPECIFY)                                |  |

|      |                                                             |                          |                                                                           |       |
|------|-------------------------------------------------------------|--------------------------|---------------------------------------------------------------------------|-------|
| Q19. | CHECK Q11A: IF YES TO (1) MATERNITY CARE/ DELIVERY SERVICES | <input type="checkbox"/> | IF NO TO (1) MATERNITY CARE/DELIVERY SERVICES<br><input type="checkbox"/> | → Q23 |
|------|-------------------------------------------------------------|--------------------------|---------------------------------------------------------------------------|-------|

|      |                                                                                                                                                                                                                                                                                                            |                                                                                                                                                                                                                                                                                                                                                                                   |  |
|------|------------------------------------------------------------------------------------------------------------------------------------------------------------------------------------------------------------------------------------------------------------------------------------------------------------|-----------------------------------------------------------------------------------------------------------------------------------------------------------------------------------------------------------------------------------------------------------------------------------------------------------------------------------------------------------------------------------|--|
| Q20. | What is the normal practice for this facility if a woman who has come for <b>maternity care/delivery service</b> is interested in <b>receiving information</b> on FP? Is she able to receive this information on the day of her visit, or is she asked to come back on a different day?<br><br>CIRCLE ONE. | Always receive on same day.....01<br>Sometimes receive on same day.....02<br>Make appointment to come back a different day....03<br>No appointment made, always told to come back different day.....04<br>Given referral to another facility.....05<br>Given no information or referral.....06<br>Do not offer family planning services.....07 → Q23<br>Other.....96<br>(SPECIFY) |  |
|------|------------------------------------------------------------------------------------------------------------------------------------------------------------------------------------------------------------------------------------------------------------------------------------------------------------|-----------------------------------------------------------------------------------------------------------------------------------------------------------------------------------------------------------------------------------------------------------------------------------------------------------------------------------------------------------------------------------|--|

|      |                                                                                                                                                                                                                                                                                                   |                                                                                                                                                                                                                                                                                                                                                                             |     |
|------|---------------------------------------------------------------------------------------------------------------------------------------------------------------------------------------------------------------------------------------------------------------------------------------------------|-----------------------------------------------------------------------------------------------------------------------------------------------------------------------------------------------------------------------------------------------------------------------------------------------------------------------------------------------------------------------------|-----|
| Q21. | If a woman who has come for <b>maternity care/delivery service</b> is interested in <b>receiving a hormonal method of FP</b> , what is the normal practice for this facility?<br><br>CIRCLE ONE.                                                                                                  | Always receive on same day.....01<br>Sometimes receive on same day.....02<br>Make appointment to come back a different day....03<br>No appointment made, always told to come back different day.....04<br>Given referral to another facility.....05<br>Given no information or referral.....06<br>Other.....96<br>(SPECIFY)                                                 |     |
| Q22. | If a woman who has come for <b>maternity care/delivery service</b> is interested in <b>getting sterilized</b> , what is the normal practice for this facility?<br><br>CIRCLE ONE.                                                                                                                 | Procedure can happen on same day.....01<br>Sometimes the procedure can happen on same day.....02<br>Make appointment to come back a different day.....03<br>No appointment made, always told to come back different day.....04<br>Given referral to another facility.....05<br>Given no information or referral.....06<br>Other.....96<br>(SPECIFY)                         |     |
| Q23. | CHECK Q11A: IF YES TO (12) POST NATAL CARE<br><input type="checkbox"/>                                                                                                                                                                                                                            | IF NO TO (12) POST NATAL CARE<br><input type="checkbox"/>                                                                                                                                                                                                                                                                                                                   | Q27 |
| Q24. | What is the normal practice for this facility if a woman who has come for a <b>postnatal care visit</b> is interested in <b>receiving information</b> on FP? Is she able to receive this information on the day of her visit, or is she asked to come back on a different day?<br><br>CIRCLE ONE. | Always receive on same day.....01<br>Sometimes receive on same day.....02<br>Make appointment to come back a different day....03<br>No appointment made, always told to come back different day.....04<br>Given referral to another facility.....05<br>Given no information or referral.....06<br>Do not offer family planning services.....07<br>Other.....96<br>(SPECIFY) | Q27 |
| Q25. | If a woman who has come for a <b>postnatal care visit</b> is interested in <b>receiving a hormonal method of FP</b> , what is the normal practice for this facility?<br><br>CIRCLE ONE.                                                                                                           | Always receive on same day.....01<br>Sometimes receive on same day.....02<br>Make appointment to come back a different day....03<br>No appointment made, always told to come back different day.....04<br>Given referral to another facility.....05<br>Given no information or referral.....06<br>Other.....96<br>(SPECIFY)                                                 |     |
| Q26. | If a woman who has come for a <b>postnatal care visit</b> is interested in <b>getting sterilized</b> , what is the normal practice for this facility?<br><br>CIRCLE ONE.                                                                                                                          | Procedure can happen on same day.....01<br>Sometimes the procedure can happen on same day.....02<br>Make appointment to come back a different day....03<br>No appointment made, always told to come back different day.....04<br>Given referral to another facility.....05<br>Given no information or referral.....06<br>Other.....96<br>(SPECIFY)                          |     |
| Q27. | CHECK Q11A. IF YES TO (5) POST-ABORTION CARE<br><input type="checkbox"/>                                                                                                                                                                                                                          | IF NO TO (5) POST-ABORTION CARE<br><input type="checkbox"/>                                                                                                                                                                                                                                                                                                                 | Q31 |
| Q28. | What is the normal practice for this facility if a woman who has come for <b>post-abortion care</b> is interested in <b>receiving information</b> on FP? Is she able to receive this information on the day of her visit, or is she asked to come back on a different day?<br><br>CIRCLE ONE.     | Always receive on same day.....01<br>Sometimes receive on same day.....02<br>Make appointment to come back a different day....03<br>No appointment made, always told to come back different day.....04<br>Given referral to another facility.....05<br>Given no information or referral.....06<br>Do not offer family planning services.....07<br>Other (specify).....96    | Q31 |

|                                                                                                                                                                                                                                                 |                                                                                                                                                                                                                                                                                                                                         |                                                                                                                                                                                                                                                                                                                                                                                          |                          |
|-------------------------------------------------------------------------------------------------------------------------------------------------------------------------------------------------------------------------------------------------|-----------------------------------------------------------------------------------------------------------------------------------------------------------------------------------------------------------------------------------------------------------------------------------------------------------------------------------------|------------------------------------------------------------------------------------------------------------------------------------------------------------------------------------------------------------------------------------------------------------------------------------------------------------------------------------------------------------------------------------------|--------------------------|
| Q29.                                                                                                                                                                                                                                            | If a woman who has come for <b>post-abortion care</b> is interested in <b>receiving a hormonal method of FP</b> , what is the normal practice for this facility?<br><br>CIRCLE ONE.                                                                                                                                                     | Always receive on same day.....01<br>Sometimes receive on same day.....02<br>Make appointment to come back a different day....03<br>No appointment made, always told to come back<br>different day.....04<br>Given referral to another facility.....05<br>Given no information or referral.....06<br>Other.....96<br><br>(SPECIFY)                                                       |                          |
| Q30.                                                                                                                                                                                                                                            | If a woman who has come for <b>post-abortion care</b> is interested in <b>getting sterilized</b> , what is the normal practice for this facility?<br><br>CIRCLE ONE.                                                                                                                                                                    | Procedure can happen on same day.....01<br>Sometimes the procedure can happen on same<br>day.....02<br>Make appointment to come back a different day....03<br>No appointment made, always told to come back<br>different day.....04<br>Given referral to another facility.....05<br>Given no information or referral.....06<br>Other.....96                                              |                          |
| <p>Q31. CHECK Q11A: IF YES TO ANY (18) Detection and treatment of STIs, (19) VCT, (20) PMTCT, OR (21) HIV/AIDS management IF NO TO ALL (18-21) <input type="checkbox"/> → Q35</p> <p style="text-align: center;"><input type="checkbox"/> ↓</p> |                                                                                                                                                                                                                                                                                                                                         |                                                                                                                                                                                                                                                                                                                                                                                          |                          |
| Q32.                                                                                                                                                                                                                                            | What is the normal practice for this facility if a woman or man who has come for <b>STI treatment, VCT, PMTCT, or HIV/AIDS care</b> is interested in <b>receiving information</b> on FP, is she/he able to receive this information on the day of her/his visit, or is she/he asked to come back on a different day?<br><br>CIRCLE ONE. | Always receive on same day.....01<br>Sometimes receive on same day.....02<br>Make appointment to come back a different day....03<br>No appointment made, always told to come back<br>different day.....04<br>Given referral to another facility.....05<br>Given no information or referral.....06<br>Do not offer family planning services.....07 → Q35<br>Other.....96<br><br>(SPECIFY) |                          |
| Q33.                                                                                                                                                                                                                                            | If a woman who has come for <b>STI treatment, VCT, PMTCT, or HIV/AIDS care</b> is interested in <b>receiving a hormonal method</b> , what is the normal practice for this facility?<br><br>CIRCLE ONE.                                                                                                                                  | Always receive on same day.....01<br>Sometimes receive on same day.....02<br>Make appointment to come back a different day....03<br>No appointment made, always told to come back<br>different day.....04<br>Given referral to another facility.....05<br>Given no information or referral.....06<br>Other.....96<br><br>(SPECIFY)                                                       |                          |
| Q34.                                                                                                                                                                                                                                            | If a woman who has come for <b>STI treatment, VCT, PMTCT, or HIV/AIDS care</b> is interested in <b>getting sterilized</b> , what is the normal practice for this facility?<br><br>CIRCLE ONE.                                                                                                                                           | Procedure can happen on same day.....01<br>Sometimes the procedure can happen on same<br>day.....02<br>Make appointment to come back a different day....03<br>No appointment made, always told to come back<br>different day.....04<br>Given referral to another facility.....05<br>Given no information or referral.....06<br>Other.....96                                              |                          |
| Q35.                                                                                                                                                                                                                                            | [SEE Q11A (22) FAMILY PLANNING COUNSELING & SERVICES] → IF FP <b>IS OFFERED</b> ,<br><br>YES, <input type="checkbox"/><br>↓                                                                                                                                                                                                             | [SEE Q11A (22) FAMILY PLANNING COUNSELING & SERVICES] → IF FP <b>IS NOT OFFERED</b> ,<br><br>NO, <input type="checkbox"/><br>↓<br>Would FP counseling and services be appropriate to include into the existing services offered?<br><br>Yes ..... 1<br>No ..... 2<br>Don't know ..... 8 } →                                                                                              | ALL<br>SKIP<br>TO<br>Q65 |

| ASK IF THE FOLLOWING CONTRACEPTIVES ARE PROVIDED IN THIS FACILITY. FOR EACH ITEM, CIRCLE THE APPROPRIATE CODE. |                                                                     |                                                      |                                                                                            |                                                                                     |                                                                                         |
|----------------------------------------------------------------------------------------------------------------|---------------------------------------------------------------------|------------------------------------------------------|--------------------------------------------------------------------------------------------|-------------------------------------------------------------------------------------|-----------------------------------------------------------------------------------------|
| METHOD                                                                                                         | Q36a. Does this facility provide the following FP methods/services? | Q36b. How many days per week is the method provided? | Q36c. What year was METHOD first offered at this facility?<br><br><b>Don't know = 9998</b> | Q36d. Are there requirements for partner's consent to receive the following METHOD? | Q36e. How many staff do you have that can provide METHOD?                               |
| (01) Combined oral pill                                                                                        | YES.....1<br>NO.....2<br>↓<br><b>(02)</b>                           | Days...<br><input type="checkbox"/>                  | <input type="text"/> <input type="text"/> <input type="text"/> <input type="text"/>        | YES.....1<br>NO.....2                                                               |                                                                                         |
| (02) Progestin only pill                                                                                       | YES.....1<br>NO.....2<br>↓<br><b>(03)</b>                           | Days...<br><input type="checkbox"/>                  | <input type="text"/> <input type="text"/> <input type="text"/> <input type="text"/>        | YES.....1<br>NO.....2                                                               |                                                                                         |
| (03) Emergency contraceptive                                                                                   | YES.....1<br>NO.....2<br>↓<br><b>(04)</b>                           | Days...<br><input type="checkbox"/>                  | <input type="text"/> <input type="text"/> <input type="text"/> <input type="text"/>        | YES.....1<br>NO.....2                                                               |                                                                                         |
| (04) Male condom                                                                                               | YES.....1<br>NO.....2<br>↓<br><b>(05)</b>                           | Days...<br><input type="checkbox"/>                  | <input type="text"/> <input type="text"/> <input type="text"/> <input type="text"/>        | YES.....1<br>NO.....2                                                               |                                                                                         |
| (05) Female condom                                                                                             | YES.....1<br>NO.....2<br>↓<br><b>(06)</b>                           | Days...<br><input type="checkbox"/>                  | <input type="text"/> <input type="text"/> <input type="text"/> <input type="text"/>        | YES.....1<br>NO.....2                                                               |                                                                                         |
| (06) Injectables                                                                                               | YES.....1<br>NO.....2<br>↓<br><b>(07)</b>                           | Days...<br><input type="checkbox"/>                  | <input type="text"/> <input type="text"/> <input type="text"/> <input type="text"/>        | YES.....1<br>NO.....2                                                               |                                                                                         |
| (07) Implants (Jadelle/Implanon)                                                                               | YES.....1<br>NO.....2<br>↓<br><b>(08)</b>                           | Days...<br><input type="checkbox"/>                  | <input type="text"/> <input type="text"/> <input type="text"/> <input type="text"/>        | YES.....1<br>NO.....2                                                               | [ <input type="text"/> <input type="text"/> <input type="text"/> <input type="text"/> ] |
| (08) IUCD                                                                                                      | YES.....1<br>NO.....2<br>↓<br><b>(09)</b>                           | Days...<br><input type="checkbox"/>                  | <input type="text"/> <input type="text"/> <input type="text"/> <input type="text"/>        | YES.....1<br>NO.....2                                                               | [ <input type="text"/> <input type="text"/> <input type="text"/> <input type="text"/> ] |
| (09) Female sterilization/tubal ligation                                                                       | YES.....1<br>NO.....2<br>↓<br><b>(10)</b>                           | Days...<br><input type="checkbox"/>                  | <input type="text"/> <input type="text"/> <input type="text"/> <input type="text"/>        | YES.....1<br>NO.....2                                                               | [ <input type="text"/> <input type="text"/> <input type="text"/> <input type="text"/> ] |
| (10) Male sterilization                                                                                        | YES.....1<br>NO.....2<br>↓<br><b>(11)</b>                           | Days...<br><input type="checkbox"/>                  | <input type="text"/> <input type="text"/> <input type="text"/> <input type="text"/>        | YES.....1<br>NO.....2                                                               | [ <input type="text"/> <input type="text"/> <input type="text"/> <input type="text"/> ] |
| (11) SDM/Cycle beads                                                                                           | YES.....1<br>NO.....2<br>↓<br><b>(12)</b>                           | Days...<br><input type="checkbox"/>                  | <input type="text"/> <input type="text"/> <input type="text"/> <input type="text"/>        | YES.....1<br>NO.....2                                                               |                                                                                         |
| (12) LAM                                                                                                       | YES.....1<br>NO.....2<br>↓<br><b>(13)</b>                           | Days...<br><input type="checkbox"/>                  | <input type="text"/> <input type="text"/> <input type="text"/> <input type="text"/>        | YES.....1<br>NO.....2                                                               |                                                                                         |
| (13) Other (specify)<br>_____                                                                                  | YES.....1<br>NO.....2<br>↓<br><b>(Q31a)</b>                         | Days...<br><input type="checkbox"/>                  | <input type="text"/> <input type="text"/> <input type="text"/> <input type="text"/>        | YES.....1<br>NO.....2                                                               |                                                                                         |

| ONLY ASK ABOUT THOSE METHODS THAT ARE OFFERED AT THE FACILITY FROM Q36a. |                                                                                                   |                                                                                                                               |
|--------------------------------------------------------------------------|---------------------------------------------------------------------------------------------------|-------------------------------------------------------------------------------------------------------------------------------|
| METHOD                                                                   | Q37a. How many [NAMED METHOD] do you usually provide to a <b>new acceptor</b> on her first visit? | Q37b. How many [NAMED METHOD] do you usually provide to a woman coming for <b>resupply/continuing to use the same method?</b> |
| (01) Combined oral contraceptives<br>(number of cycles)                  | <input type="text"/> <input type="text"/>                                                         | <input type="text"/> <input type="text"/>                                                                                     |
| (02) Progestin-only oral contraceptives<br>(number of cycles)            | <input type="text"/> <input type="text"/>                                                         | <input type="text"/> <input type="text"/>                                                                                     |
| (03) Male condoms<br>(number of pieces)                                  | <input type="text"/> <input type="text"/>                                                         | <input type="text"/> <input type="text"/>                                                                                     |
| (04) Female condoms<br>(number of pieces)                                | <input type="text"/> <input type="text"/>                                                         | <input type="text"/> <input type="text"/>                                                                                     |



| Now I'm going to ask you some questions related to how much clients pay for contraceptive services and methods.<br><b>ONLY ASK ABOUT THOSE METHODS THAT ARE OFFERED BY THE FACILITY FROM Q36a.</b> |                                                                                                                                                             |                                                                                      |                                                                                                                                                                                                                                                                   |                                                                                                                                        |
|----------------------------------------------------------------------------------------------------------------------------------------------------------------------------------------------------|-------------------------------------------------------------------------------------------------------------------------------------------------------------|--------------------------------------------------------------------------------------|-------------------------------------------------------------------------------------------------------------------------------------------------------------------------------------------------------------------------------------------------------------------|----------------------------------------------------------------------------------------------------------------------------------------|
| METHOD                                                                                                                                                                                             | Q38a. How much is the consultation fee (in Naira) for METHOD/PROCEDURE?<br><br>OR<br><br>Package Deal (both consult and method/procedure)                   | Q38b. Do fees for METHOD vary depending on the product available?                    | Q38c. How much is the METHOD/PROCEDURE?<br><br>RECORD THE RANGE (in Naira) IF PRICE DIFFERS BY BRAND <b><u>FROM LOWEST TO HIGHEST PRICE.</u></b><br><br>RECORD THE PRICE IN THE FIRST FIELD IF THERE IS ONLY ONE PRODUCT OR IF THE PRICE DOES NOT DIFFER BY BRAND | CHECK – IF OPTION Q38A AND Q38C is “FREE”, GO TO NEXT METHOD<br><br>Q38d. What percent of clients pay the charge for METHOD/PROCEDURE? |
| (01) Combined oral pill                                                                                                                                                                            | CONSULTATION....1 [ ] [ ] [ ] [ ] [ ] [ ]<br>OR<br>PACKAGE DEAL.....2 [ ] [ ] [ ] [ ] [ ] [ ] → <b>Q38d</b><br><br>FREE.....999995<br>DON'T KNOW.....999998 | Yes . . . . .1<br>No/only one brand or product available..... 2<br>Don't know .....8 | [ ] [ ] [ ] [ ]<br>TO<br>[ ] [ ] [ ] [ ] per cycle<br><br>PRESCRIPTION/REFERRAL ONLY.....9994<br>FREE.....9995<br>DON'T KNOW.....9998                                                                                                                             | [ ] [ ] [ ] [ ]                                                                                                                        |
| (02) Progestin only pill                                                                                                                                                                           | CONSULTATION....1 [ ] [ ] [ ] [ ] [ ] [ ]<br>OR<br>PACKAGE DEAL.....2 [ ] [ ] [ ] [ ] [ ] [ ] → <b>Q38d</b><br><br>FREE.....999995<br>DON'T KNOW.....999998 | Yes . . . . .1<br>No/only one brand or product available..... 2<br>Don't know .....8 | [ ] [ ] [ ] [ ]<br>TO<br>[ ] [ ] [ ] [ ] per cycle<br><br>PRESCRIPTION/REFERRAL ONLY.....9994<br>FREE.....9995<br>DON'T KNOW.....9998                                                                                                                             | [ ] [ ] [ ] [ ]                                                                                                                        |
| (03) Emergency contraceptive                                                                                                                                                                       | CONSULTATION....1 [ ] [ ] [ ] [ ] [ ] [ ]<br>OR<br>PACKAGE DEAL.....2 [ ] [ ] [ ] [ ] [ ] [ ] → <b>Q38d</b><br><br>FREE.....999995<br>DON'T KNOW.....999998 | Yes . . . . .1<br>No/only one brand or product available..... 2<br>Don't know .....8 | [ ] [ ] [ ] [ ]<br>TO<br>[ ] [ ] [ ] [ ] per package/cycle<br><br>PRESCRIPTION/REFERRAL ONLY.....9994<br>FREE.....9995<br>DON'T KNOW.....9998                                                                                                                     | [ ] [ ] [ ] [ ]                                                                                                                        |
| (04) Male condom                                                                                                                                                                                   | CONSULTATION....1 [ ] [ ] [ ] [ ] [ ] [ ]<br>OR<br>PACKAGE DEAL.....2 [ ] [ ] [ ] [ ] [ ] [ ] → <b>Q38d</b><br><br>FREE.....999995<br>DON'T KNOW.....999998 | Yes . . . . .1<br>No/only one brand or product available..... 2<br>Don't know .....8 | [ ] [ ] [ ] [ ]<br>TO<br>[ ] [ ] [ ] [ ] per piece<br><br>PRESCRIPTION/REFERRAL ONLY.....9994<br>FREE.....9995<br>DON'T KNOW.....9998                                                                                                                             | [ ] [ ] [ ] [ ]                                                                                                                        |

| Now I'm going to ask you some questions related to how much clients pay for contraceptive services and methods.<br><b>ONLY ASK ABOUT THOSE METHODS THAT ARE OFFERED BY THE FACILITY FROM Q36a.</b> |                                                                                                                                                             |                                                                                      |                                                                                                                                                                                                                                                                   |                                                                                                                                        |
|----------------------------------------------------------------------------------------------------------------------------------------------------------------------------------------------------|-------------------------------------------------------------------------------------------------------------------------------------------------------------|--------------------------------------------------------------------------------------|-------------------------------------------------------------------------------------------------------------------------------------------------------------------------------------------------------------------------------------------------------------------|----------------------------------------------------------------------------------------------------------------------------------------|
| METHOD                                                                                                                                                                                             | Q38a. How much is the consultation fee (in Naira) for METHOD/PROCEDURE?<br><br>OR<br><br>Package Deal (both consult and method/procedure)                   | Q38b. Do fees for METHOD vary depending on the product available?                    | Q38c. How much is the METHOD/PROCEDURE?<br><br>RECORD THE RANGE (in Naira) IF PRICE DIFFERS BY BRAND <b><u>FROM LOWEST TO HIGHEST PRICE.</u></b><br><br>RECORD THE PRICE IN THE FIRST FIELD IF THERE IS ONLY ONE PRODUCT OR IF THE PRICE DOES NOT DIFFER BY BRAND | CHECK – IF OPTION Q38A AND Q38C is “FREE”, GO TO NEXT METHOD<br><br>Q38d. What percent of clients pay the charge for METHOD/PROCEDURE? |
| (05) Female condom                                                                                                                                                                                 | CONSULTATION....1 [ ] [ ] [ ] [ ] [ ] [ ]<br>OR<br>PACKAGE DEAL.....2 [ ] [ ] [ ] [ ] [ ] [ ] → <b>Q38d</b><br><br>FREE.....999995<br>DON'T KNOW.....999998 | Yes . . . . .1<br>No/only one brand or product available..... 2<br>Don't know .....8 | [ ] [ ] [ ] [ ]<br>TO<br>[ ] [ ] [ ] [ ] per piece<br><br>PRESCRIPTION/REFERRAL ONLY.....9994<br>FREE.....9995<br>DON'T KNOW.....9998                                                                                                                             | [ ] [ ] [ ] [ ]                                                                                                                        |
| (06) Injectables [Depo (DMPA), Noristorat]                                                                                                                                                         | CONSULTATION....1 [ ] [ ] [ ] [ ] [ ] [ ]<br>OR<br>PACKAGE DEAL.....2 [ ] [ ] [ ] [ ] [ ] [ ] → <b>Q38d</b><br><br>FREE.....999995<br>DON'T KNOW.....999998 | Yes . . . . .1<br>No/only one brand or product available..... 2<br>Don't know .....8 | [ ] [ ] [ ] [ ]<br>TO<br>[ ] [ ] [ ] [ ] per injectable<br><br>PRESCRIPTION/REFERRAL ONLY.....9994<br>FREE.....9995<br>DON'T KNOW.....9998                                                                                                                        | [ ] [ ] [ ] [ ]                                                                                                                        |
| (07) Implants (Jadelle/Implanon)                                                                                                                                                                   | CONSULTATION....1 [ ] [ ] [ ] [ ] [ ] [ ]<br>OR<br>PACKAGE DEAL.....2 [ ] [ ] [ ] [ ] [ ] [ ] → <b>Q38d</b><br><br>FREE.....999995<br>DON'T KNOW.....999998 | Yes . . . . .1<br>No/only one brand or product available..... 2<br>Don't know .....8 | [ ] [ ] [ ] [ ] [ ] [ ]<br>TO<br>[ ] [ ] [ ] [ ] [ ] [ ] per implant<br><br>PRESCRIPTION/REFERRAL ONLY.....9994<br>FREE.....9995<br>DON'T KNOW.....9998                                                                                                           | [ ] [ ] [ ] [ ]                                                                                                                        |
| (08) IUCD                                                                                                                                                                                          | CONSULTATION....1 [ ] [ ] [ ] [ ] [ ] [ ]<br>OR<br>PACKAGE DEAL.....2 [ ] [ ] [ ] [ ] [ ] [ ] → <b>Q38d</b><br><br>FREE.....999995<br>DON'T KNOW.....999998 | Yes . . . . .1<br>No/only one brand or product available..... 2<br>Don't know .....8 | [ ] [ ] [ ] [ ] [ ] [ ]<br>TO<br>[ ] [ ] [ ] [ ] [ ] [ ] per IUD<br><br>PRESCRIPTION/REFERRAL ONLY.....9994<br>FREE.....9995<br>DON'T KNOW.....9998                                                                                                               | [ ] [ ] [ ] [ ]                                                                                                                        |

Now I'm going to ask you some questions related to how much clients pay for contraceptive services and methods.

**ONLY ASK ABOUT THOSE METHODS THAT ARE OFFERED BY THE FACILITY FROM Q36a.**

| METHOD                                       | Q38a. How much is the consultation fee (in Naira) for METHOD/PROCEDURE?<br><br>OR<br><br>Package Deal (both consult and method/procedure)            | Q38b. Do fees for METHOD vary depending on the product available?                   | Q38c. How much is the METHOD/PROCEDURE?<br><br>RECORD THE RANGE (in Naira) IF PRICE DIFFERS BY BRAND <b><u>FROM LOWEST TO HIGHEST PRICE.</u></b><br><br>RECORD THE PRICE IN THE FIRST FIELD IF THERE IS ONLY ONE PRODUCT OR IF THE PRICE DOES NOT DIFFER BY BRAND | CHECK – IF OPTION Q38A AND Q38C is “FREE”, GO TO NEXT METHOD<br><br>Q38d. What percent of clients pay the charge for METHOD/PROCEDURE? |
|----------------------------------------------|------------------------------------------------------------------------------------------------------------------------------------------------------|-------------------------------------------------------------------------------------|-------------------------------------------------------------------------------------------------------------------------------------------------------------------------------------------------------------------------------------------------------------------|----------------------------------------------------------------------------------------------------------------------------------------|
| (09) Female sterilization/<br>tubal ligation | CONSULTATION....1 [ ] [ ] [ ] [ ] [ ] [ ]<br>OR<br>PACKAGE DEAL.....2 [ ] [ ] [ ] [ ] [ ] [ ] → Q38d<br><br>FREE.....999995<br>DON'T KNOW.....999998 |                                                                                     | [ ] [ ] [ ] [ ] [ ]<br>TO<br>[ ] [ ] [ ] [ ] [ ] [ ] PER OPERATION<br><br>REFERRAL ONLY.....99994<br>FREE.....99995<br>DON'T KNOW.....99998                                                                                                                       | [ ] [ ] [ ] [ ]                                                                                                                        |
| (10) Male sterilization                      | CONSULTATION....1 [ ] [ ] [ ] [ ] [ ] [ ]<br>OR<br>PACKAGE DEAL.....2 [ ] [ ] [ ] [ ] [ ] [ ] → Q38d<br><br>FREE.....999995<br>DON'T KNOW.....999998 |                                                                                     | [ ] [ ] [ ] [ ] [ ]<br>TO<br>[ ] [ ] [ ] [ ] [ ] [ ] PER OPERATION<br><br>REFERRAL ONLY.....99994<br>FREE.....99995<br>DON'T KNOW.....99998                                                                                                                       | [ ] [ ] [ ] [ ]                                                                                                                        |
| (11) SDM/Cycle beads                         | CONSULTATION....1 [ ] [ ] [ ] [ ] [ ] [ ]<br>OR<br>PACKAGE DEAL.....2 [ ] [ ] [ ] [ ] [ ] [ ] → Q38d<br><br>FREE.....999995<br>DON'T KNOW.....999998 | Yes . . . . .1<br>No/only one brand or product available.... 2<br>Don't know .....8 | [ ] [ ] [ ] [ ] [ ]<br>TO<br>[ ] [ ] [ ] [ ] [ ] [ ] per UNIT<br><br>PRESCRIPTION/REFERRAL ONLY....9994<br>FREE.....9995<br>DON'T KNOW.....9998                                                                                                                   | [ ] [ ] [ ] [ ]                                                                                                                        |
| (12) Other (specify)<br><br>_____            | CONSULTATION....1 [ ] [ ] [ ] [ ] [ ] [ ]<br>OR<br>PACKAGE DEAL.....2 [ ] [ ] [ ] [ ] [ ] [ ] → Q38d<br><br>FREE.....999995<br>DON'T KNOW.....999998 | Yes . . . . .1<br>No/only one brand or product available.... 2<br>Don't know .....8 | [ ] [ ] [ ] [ ] [ ]<br>TO<br>[ ] [ ] [ ] [ ] [ ] [ ] per UNIT<br><br>PRESCRIPTION/REFERRAL ONLY....9994<br>FREE.....9995<br>DON'T KNOW.....9998                                                                                                                   | [ ] [ ] [ ] [ ]                                                                                                                        |

|                                                                                                                                                                                                                                                                                 |                                                                                                  |                                                                                                                                                                                                                                                                                                        |
|---------------------------------------------------------------------------------------------------------------------------------------------------------------------------------------------------------------------------------------------------------------------------------|--------------------------------------------------------------------------------------------------|--------------------------------------------------------------------------------------------------------------------------------------------------------------------------------------------------------------------------------------------------------------------------------------------------------|
| <p><b>Q39a.</b><br/>How many clients received family planning services in the <i>last 12 completed months</i>?</p> <p>[               ]</p> <p>NOT AVAILABLE..999993 → <b>Q40a</b></p>                                                                                          | <p><b>Q39b.</b><br/>RECORD THE NUMBER OF MONTHS OF DATA REPRESENTED IN<br/>Q39a</p> <p>[   ]</p> | <p><b>Q39c.</b><br/>INDICATE FROM WHERE STATISTICS COME :</p> <p>OBSERVED, COUNTED IN REGISTER.....1<br/>OBSERVED, SUMMED FROM REGISTER MONTHLY TOTALS..2<br/>OBSERVED, SUMMED FROM MONTHLY REPORTS.....3<br/>OBSERVED, FROM YEARLY REPORT.....4<br/>ESTIMATED.....5<br/>OTHER.....6<br/>(SPECIFY)</p> |
| <p><b>Q40a.</b><br/>Total new family planning acceptors/users in the <i>last 12 completed months</i>?</p> <p>[               ]</p> <p>NOTE: New acceptors/users = new to clinic and those who switch methods on day of service.</p> <p>NOT AVAILABLE...999993 → <b>Q41a</b></p> | <p><b>Q40b.</b><br/>RECORD THE NUMBER OF MONTHS OF DATA REPRESENTED IN<br/>Q40a</p> <p>[   ]</p> | <p><b>Q40c.</b><br/>INDICATE FROM WHERE STATISTICS COME :</p> <p>OBSERVED, COUNTED IN REGISTER.....1<br/>OBSERVED, SUMMED FROM REGISTER MONTHLY TOTALS..2<br/>OBSERVED, SUMMED FROM MONTHLY REPORTS.....3<br/>OBSERVED, FROM YEARLY REPORT.....4<br/>ESTIMATED.....5<br/>OTHER.....6<br/>(SPECIFY)</p> |
| <p><b>Q41a.</b><br/>Total FP visits in the <i>last 12 completed months</i>?</p> <p>[               ]</p> <p>NOT AVAILABLE...999993 → <b>Q42a</b></p>                                                                                                                            | <p><b>Q41b.</b><br/>RECORD THE NUMBER OF MONTHS OF DATA REPRESENTED IN<br/>Q41a</p> <p>[   ]</p> | <p><b>Q41c.</b><br/>INDICATE FROM WHERE STATISTICS COME :</p> <p>OBSERVED, COUNTED IN REGISTER.....1<br/>OBSERVED, SUMMED FROM REGISTER MONTHLY TOTALS..2<br/>OBSERVED, SUMMED FROM MONTHLY REPORTS.....3<br/>OBSERVED, FROM YEARLY REPORT.....4<br/>ESTIMATED.....5<br/>OTHER.....6<br/>(SPECIFY)</p> |

**SERVICE STATISTICS** Now I want to ask about service statistics for the following contraceptive methods. For each method I ask about, please tell me the number of new acceptors/users and the number of resupply/continuing users for both the last month and the last 12 months.

| Q42. METHOD<br><br>ONLY ASK ABOUT THOSE METHODS THAT ARE OFFERED IN Q36a. | Q42a.<br>Number of <u>new acceptors / users</u> last month | Q42b.<br>Number of <u>resupply / continuing clients</u> last month | Q42c.<br>INDICATE FROM WHERE STATISTICS COME FOR Q42a AND Q42b<br><br>IF BOTH Q42a AND Q42b EQUAL 9993, SKIP TO Q42d                                                 | Q42d.<br>Number of <u>new acceptors/users</u> last 12 months | Q42e.<br>RECORD THE NUMBER OF MONTHS OF DATA REPRESENTED IN Q42d | Q42f.<br>INDICATE FROM WHERE STATISTICS COME FOR Q42d                                                                                                                                                                           | Q42g.<br>Number of <u>resupply / continuing clients</u> last 12 months | Q42h.<br>RECORD THE NUMBER OF MONTHS OF DATA REPRESENTED IN Q42g | Q42i.<br>INDICATE FROM WHERE STATISTICS COME FOR Q42g                                                                                                                                                                           |
|---------------------------------------------------------------------------|------------------------------------------------------------|--------------------------------------------------------------------|----------------------------------------------------------------------------------------------------------------------------------------------------------------------|--------------------------------------------------------------|------------------------------------------------------------------|---------------------------------------------------------------------------------------------------------------------------------------------------------------------------------------------------------------------------------|------------------------------------------------------------------------|------------------------------------------------------------------|---------------------------------------------------------------------------------------------------------------------------------------------------------------------------------------------------------------------------------|
| (01) Combined oral pill                                                   | [ ] [ ] [ ] [ ] [ ] [ ]<br><br>NOT AVAILABLE...9993        | [ ] [ ] [ ] [ ] [ ] [ ]<br><br>NOT AVAILABLE...9993                | OBSERVED, COUNTED IN REGISTER.....1<br>OBSERVED, REGISTER MONTHLY TOTAL.....2<br>OBSERVED, FROM MONTHLY REPORT.....3<br>ESTIMATED.....4<br>OTHER:.....6<br>(SPECIFY) | [ ] [ ] [ ] [ ] [ ] [ ]<br><br>NOT AVAILABLE ...9993 → Q42g  | [ ] [ ] [ ]                                                      | OBSERVED, COUNTED IN REGISTER.....1<br>OBSERVED, SUMMED FROM REGISTER MONTHLY TOTALS.....2<br>OBSERVED, SUMMED FROM MONTHLY REPORTS.....3<br>OBSERVED, FROM YEARLY REPORT.....4<br>ESTIMATED.....5<br>OTHER:.....6<br>(SPECIFY) | [ ] [ ] [ ] [ ] [ ] [ ]<br><br>NOT AVAILABLE ...9993 → (02)            | [ ] [ ] [ ]                                                      | OBSERVED, COUNTED IN REGISTER.....1<br>OBSERVED, SUMMED FROM REGISTER MONTHLY TOTALS.....2<br>OBSERVED, SUMMED FROM MONTHLY REPORTS.....3<br>OBSERVED, FROM YEARLY REPORT.....4<br>ESTIMATED.....5<br>OTHER:.....6<br>(SPECIFY) |
| (02) Progestin only pill                                                  | [ ] [ ] [ ] [ ] [ ] [ ]<br><br>NOT AVAILABLE...9993        | [ ] [ ] [ ] [ ] [ ] [ ]<br><br>NOT AVAILABLE...9993                | OBSERVED, COUNTED IN REGISTER.....1<br>OBSERVED, REGISTER MONTHLY TOTAL.....2<br>OBSERVED, FROM MONTHLY REPORT.....3<br>ESTIMATED.....4<br>OTHER:.....6<br>(SPECIFY) | [ ] [ ] [ ] [ ] [ ] [ ]<br><br>NOT AVAILABLE ...9993 → Q42g  | [ ] [ ] [ ]                                                      | OBSERVED, COUNTED IN REGISTER.....1<br>OBSERVED, SUMMED FROM REGISTER MONTHLY TOTALS.....2<br>OBSERVED, SUMMED FROM MONTHLY REPORTS.....3<br>OBSERVED, FROM YEARLY REPORT.....4<br>ESTIMATED.....5<br>OTHER:.....6<br>(SPECIFY) | [ ] [ ] [ ] [ ] [ ] [ ]<br><br>NOT AVAILABLE ...9993 → (03)            | [ ] [ ] [ ]                                                      | OBSERVED, COUNTED IN REGISTER.....1<br>OBSERVED, SUMMED FROM REGISTER MONTHLY TOTALS.....2<br>OBSERVED, SUMMED FROM MONTHLY REPORTS.....3<br>OBSERVED, FROM YEARLY REPORT.....4<br>ESTIMATED.....5<br>OTHER:.....6<br>(SPECIFY) |

**SERVICE STATISTICS** Now I want to ask about service statistics for the following contraceptive methods. For each method I ask about, please tell me the number of new acceptors/users and the number of resupply/continuing users for both the last month and the last 12 months.

| Q42. METHOD<br><br>ONLY ASK ABOUT THOSE METHODS THAT ARE OFFERED IN Q36a. | Q42a.<br>Number of <u>new acceptors / users</u> last month | Q42b.<br>Number of <u>resupply / continuing clients</u> last month | Q42c.<br>INDICATE FROM WHERE STATISTICS COME FOR Q42a AND Q42b<br><br>IF BOTH Q42a AND Q42b EQUAL 9993, SKIP TO Q42d                                                 | Q42d.<br>Number of <u>new acceptors/users</u> last 12 months | Q42e.<br>RECORD THE NUMBER OF MONTHS OF DATA REPRESENTED IN Q42d | Q42f.<br>INDICATE FROM WHERE STATISTICS COME FOR Q42d                                                                                                                                                                           | Q42g.<br>Number of <u>resupply / continuing clients</u> last 12 months | Q42h.<br>RECORD THE NUMBER OF MONTHS OF DATA REPRESENTED IN Q42g | Q42i.<br>INDICATE FROM WHERE STATISTICS COME FOR Q42g                                                                                                                                                                           |
|---------------------------------------------------------------------------|------------------------------------------------------------|--------------------------------------------------------------------|----------------------------------------------------------------------------------------------------------------------------------------------------------------------|--------------------------------------------------------------|------------------------------------------------------------------|---------------------------------------------------------------------------------------------------------------------------------------------------------------------------------------------------------------------------------|------------------------------------------------------------------------|------------------------------------------------------------------|---------------------------------------------------------------------------------------------------------------------------------------------------------------------------------------------------------------------------------|
| (03)<br>Emergency contraceptive                                           | [ ][ ][ ][ ][ ][ ]<br><br>NOT AVAILABLE...9993             | [ ][ ][ ][ ][ ][ ]<br><br>NOT AVAILABLE...9993                     | OBSERVED, COUNTED IN REGISTER.....1<br>OBSERVED, REGISTER MONTHLY TOTAL.....2<br>OBSERVED, FROM MONTHLY REPORT.....3<br>ESTIMATED.....4<br>OTHER:.....6<br>(SPECIFY) | [ ][ ][ ][ ][ ][ ]<br><br>NOT AVAILABLE ...9993 → Q42g       | [ ][ ][ ]                                                        | OBSERVED, COUNTED IN REGISTER.....1<br>OBSERVED, SUMMED FROM REGISTER MONTHLY TOTALS.....2<br>OBSERVED, SUMMED FROM MONTHLY REPORTS.....3<br>OBSERVED, FROM YEARLY REPORT.....4<br>ESTIMATED.....5<br>OTHER:.....6<br>(SPECIFY) | [ ][ ][ ][ ][ ][ ]<br><br>NOT AVAILABLE ...9993 → (04)                 | [ ][ ][ ]                                                        | OBSERVED, COUNTED IN REGISTER.....1<br>OBSERVED, SUMMED FROM REGISTER MONTHLY TOTALS.....2<br>OBSERVED, SUMMED FROM MONTHLY REPORTS.....3<br>OBSERVED, FROM YEARLY REPORT.....4<br>ESTIMATED.....5<br>OTHER:.....6<br>(SPECIFY) |
| (04) Male condom                                                          | [ ][ ][ ][ ][ ][ ]<br><br>NOT AVAILABLE...9993             | [ ][ ][ ][ ][ ][ ]<br><br>NOT AVAILABLE...9993                     | OBSERVED, COUNTED IN REGISTER.....1<br>OBSERVED, REGISTER MONTHLY TOTAL.....2<br>OBSERVED, FROM MONTHLY REPORT.....3<br>ESTIMATED.....4<br>OTHER:.....6<br>(SPECIFY) | [ ][ ][ ][ ][ ][ ]<br><br>NOT AVAILABLE ...9993 → Q42g       | [ ][ ][ ]                                                        | OBSERVED, COUNTED IN REGISTER.....1<br>OBSERVED, SUMMED FROM REGISTER MONTHLY TOTALS.....2<br>OBSERVED, SUMMED FROM MONTHLY REPORTS.....3<br>OBSERVED, FROM YEARLY REPORT.....4<br>ESTIMATED.....5<br>OTHER:.....6<br>(SPECIFY) | [ ][ ][ ][ ][ ][ ]<br><br>NOT AVAILABLE ...9993 → (05)                 | [ ][ ][ ]                                                        | OBSERVED, COUNTED IN REGISTER.....1<br>OBSERVED, SUMMED FROM REGISTER MONTHLY TOTALS.....2<br>OBSERVED, SUMMED FROM MONTHLY REPORTS.....3<br>OBSERVED, FROM YEARLY REPORT.....4<br>ESTIMATED.....5<br>OTHER:.....6<br>(SPECIFY) |

**SERVICE STATISTICS** Now I want to ask about service statistics for the following contraceptive methods. For each method I ask about, please tell me the number of new acceptors/users and the number of resupply/continuing users for both the last month and the last 12 months.

| Q42. METHOD<br><br>ONLY ASK ABOUT THOSE METHODS THAT ARE OFFERED IN Q36a. | Q42a.<br>Number of <u>new acceptors / users</u> last month | Q42b.<br>Number of <u>resupply / continuing clients</u> last month | Q42c.<br>INDICATE FROM WHERE STATISTICS COME FOR Q42a AND Q42b<br><br>IF BOTH Q42a AND Q42b EQUAL 9993, SKIP TO Q42d                                                 | Q42d.<br>Number of <u>new acceptors/users</u> last 12 months | Q42e.<br>RECORD THE NUMBER OF MONTHS OF DATA REPRESENTED IN Q42d | Q42f.<br>INDICATE FROM WHERE STATISTICS COME FOR Q42d                                                                                                                                                                           | Q42g.<br>Number of <u>resupply / continuing clients</u> last 12 months | Q42h.<br>RECORD THE NUMBER OF MONTHS OF DATA REPRESENTED IN Q42g | Q42i.<br>INDICATE FROM WHERE STATISTICS COME FOR Q42g                                                                                                                                                                           |
|---------------------------------------------------------------------------|------------------------------------------------------------|--------------------------------------------------------------------|----------------------------------------------------------------------------------------------------------------------------------------------------------------------|--------------------------------------------------------------|------------------------------------------------------------------|---------------------------------------------------------------------------------------------------------------------------------------------------------------------------------------------------------------------------------|------------------------------------------------------------------------|------------------------------------------------------------------|---------------------------------------------------------------------------------------------------------------------------------------------------------------------------------------------------------------------------------|
| (05) Female condom                                                        | [ ] [ ] [ ] [ ] [ ]<br><br>NOT AVAILABLE...9993            | [ ] [ ] [ ] [ ] [ ]<br><br>NOT AVAILABLE...9993                    | OBSERVED, COUNTED IN REGISTER.....1<br>OBSERVED, REGISTER MONTHLY TOTAL.....2<br>OBSERVED, FROM MONTHLY REPORT.....3<br>ESTIMATED.....4<br>OTHER:.....6<br>(SPECIFY) | [ ] [ ] [ ] [ ] [ ]<br><br>NOT AVAILABLE ...9993 → Q42g      | [ ] [ ] [ ]                                                      | OBSERVED, COUNTED IN REGISTER.....1<br>OBSERVED, SUMMED FROM REGISTER MONTHLY TOTALS.....2<br>OBSERVED, SUMMED FROM MONTHLY REPORTS.....3<br>OBSERVED, FROM YEARLY REPORT.....4<br>ESTIMATED.....5<br>OTHER:.....6<br>(SPECIFY) | [ ] [ ] [ ] [ ] [ ]<br><br>NOT AVAILABLE ...9993 → (06)                | [ ] [ ] [ ]                                                      | OBSERVED, COUNTED IN REGISTER.....1<br>OBSERVED, SUMMED FROM REGISTER MONTHLY TOTALS.....2<br>OBSERVED, SUMMED FROM MONTHLY REPORTS.....3<br>OBSERVED, FROM YEARLY REPORT.....4<br>ESTIMATED.....5<br>OTHER:.....6<br>(SPECIFY) |
| (06) Injectables (Depo/Noristerat)                                        | [ ] [ ] [ ] [ ] [ ]<br><br>NOT AVAILABLE...9993            | [ ] [ ] [ ] [ ] [ ]<br><br>NOT AVAILABLE...9993                    | OBSERVED, COUNTED IN REGISTER.....1<br>OBSERVED, REGISTER MONTHLY TOTAL.....2<br>OBSERVED, FROM MONTHLY REPORT.....3<br>ESTIMATED.....4<br>OTHER:.....6<br>(SPECIFY) | [ ] [ ] [ ] [ ] [ ]<br><br>NOT AVAILABLE ...9993 → Q42g      | [ ] [ ] [ ]                                                      | OBSERVED, COUNTED IN REGISTER.....1<br>OBSERVED, SUMMED FROM REGISTER MONTHLY TOTALS.....2<br>OBSERVED, SUMMED FROM MONTHLY REPORTS.....3<br>OBSERVED, FROM YEARLY REPORT.....4<br>ESTIMATED.....5<br>OTHER:.....6<br>(SPECIFY) | [ ] [ ] [ ] [ ] [ ]<br><br>NOT AVAILABLE ...9993 → (07)                | [ ] [ ] [ ]                                                      | OBSERVED, COUNTED IN REGISTER.....1<br>OBSERVED, SUMMED FROM REGISTER MONTHLY TOTALS.....2<br>OBSERVED, SUMMED FROM MONTHLY REPORTS.....3<br>OBSERVED, FROM YEARLY REPORT.....4<br>ESTIMATED.....5<br>OTHER:.....6<br>(SPECIFY) |

**SERVICE STATISTICS** Now I want to ask about service statistics for the following contraceptive methods. For each method I ask about, please tell me the number of new acceptors/users and the number of resupply/continuing users for both the last month and the last 12 months.

| Q42. METHOD<br><br>ONLY ASK ABOUT THOSE METHODS THAT ARE OFFERED IN Q36a. | Q42a.<br>Number of <u>new acceptors / users</u> last month | Q42b.<br>Number of <u>resupply / continuing clients</u> last month | Q42c.<br>INDICATE FROM WHERE STATISTICS COME FOR Q42a AND Q42b<br><br>IF BOTH Q42a AND Q42b EQUAL 9993, SKIP TO Q42d                                                 | Q42d.<br>Number of <u>new acceptors/users</u> last 12 months | Q42e.<br>RECORD THE NUMBER OF MONTHS OF DATA REPRESENTED IN Q42d | Q42f.<br>INDICATE FROM WHERE STATISTICS COME FOR Q42d                                                                                                                                                                           | Q42g.<br>Number of <u>resupply / continuing clients</u> last 12 months | Q42h.<br>RECORD THE NUMBER OF MONTHS OF DATA REPRESENTED IN Q42g | Q42i.<br>INDICATE FROM WHERE STATISTICS COME FOR Q42g                                                                                                                                                                           |
|---------------------------------------------------------------------------|------------------------------------------------------------|--------------------------------------------------------------------|----------------------------------------------------------------------------------------------------------------------------------------------------------------------|--------------------------------------------------------------|------------------------------------------------------------------|---------------------------------------------------------------------------------------------------------------------------------------------------------------------------------------------------------------------------------|------------------------------------------------------------------------|------------------------------------------------------------------|---------------------------------------------------------------------------------------------------------------------------------------------------------------------------------------------------------------------------------|
| (07) Implants (Jadelle/ Implanon)                                         | [ ] [ ] [ ] [ ] [ ]<br><br>NOT AVAILABLE...9993            | [ ] [ ] [ ] [ ] [ ]<br><br>NOT AVAILABLE...9993                    | OBSERVED, COUNTED IN REGISTER.....1<br>OBSERVED, REGISTER MONTHLY TOTAL.....2<br>OBSERVED, FROM MONTHLY REPORT.....3<br>ESTIMATED.....4<br>OTHER:.....6<br>(SPECIFY) | [ ] [ ] [ ] [ ] [ ]<br><br>NOT AVAILABLE ...9993 → Q42g      | [ ] [ ]                                                          | OBSERVED, COUNTED IN REGISTER.....1<br>OBSERVED, SUMMED FROM REGISTER MONTHLY TOTALS.....2<br>OBSERVED, SUMMED FROM MONTHLY REPORTS.....3<br>OBSERVED, FROM YEARLY REPORT.....4<br>ESTIMATED.....5<br>OTHER:.....6<br>(SPECIFY) | [ ] [ ] [ ] [ ] [ ]<br><br>NOT AVAILABLE ...9993 → (08)                | [ ] [ ]                                                          | OBSERVED, COUNTED IN REGISTER.....1<br>OBSERVED, SUMMED FROM REGISTER MONTHLY TOTALS.....2<br>OBSERVED, SUMMED FROM MONTHLY REPORTS.....3<br>OBSERVED, FROM YEARLY REPORT.....4<br>ESTIMATED.....5<br>OTHER:.....6<br>(SPECIFY) |
| (08) IUCD                                                                 | [ ] [ ] [ ] [ ] [ ]<br><br>NOT AVAILABLE...9993            | [ ] [ ] [ ] [ ] [ ]<br><br>NOT AVAILABLE...9993                    | OBSERVED, COUNTED IN REGISTER.....1<br>OBSERVED, REGISTER MONTHLY TOTAL.....2<br>OBSERVED, FROM MONTHLY REPORT.....3<br>ESTIMATED.....4<br>OTHER:.....6<br>(SPECIFY) | [ ] [ ] [ ] [ ] [ ]<br><br>NOT AVAILABLE ...9993 → Q42g      | [ ] [ ]                                                          | OBSERVED, COUNTED IN REGISTER.....1<br>OBSERVED, SUMMED FROM REGISTER MONTHLY TOTALS.....2<br>OBSERVED, SUMMED FROM MONTHLY REPORTS.....3<br>OBSERVED, FROM YEARLY REPORT.....4<br>ESTIMATED.....5<br>OTHER:.....6<br>(SPECIFY) | [ ] [ ] [ ] [ ] [ ]<br><br>NOT AVAILABLE ...9993 → (09)                | [ ] [ ]                                                          | OBSERVED, COUNTED IN REGISTER.....1<br>OBSERVED, SUMMED FROM REGISTER MONTHLY TOTALS.....2<br>OBSERVED, SUMMED FROM MONTHLY REPORTS.....3<br>OBSERVED, FROM YEARLY REPORT.....4<br>ESTIMATED.....5<br>OTHER:.....6<br>(SPECIFY) |
| (09) Female sterilization                                                 | [ ] [ ] [ ] [ ] [ ]<br><br>NOT AVAILABLE.....9993 → Q42d   |                                                                    | OBSERVED, COUNTED IN REGISTER.....1<br>OBSERVED, REGISTER MONTHLY TOTAL.....2<br>OBSERVED, FROM MONTHLY REPORT.....3<br>ESTIMATED.....4<br>OTHER:.....6<br>(SPECIFY) | [ ] [ ] [ ] [ ] [ ]<br><br>NOT AVAILABLE ...9993 → (10)      | [ ] [ ]                                                          | OBSERVED, COUNTED IN REGISTER.....1<br>OBSERVED, SUMMED FROM REGISTER MONTHLY TOTALS.....2<br>OBSERVED, SUMMED FROM MONTHLY REPORTS.....3<br>OBSERVED, FROM YEARLY REPORT.....4<br>ESTIMATED.....5<br>OTHER:.....6<br>(SPECIFY) |                                                                        |                                                                  |                                                                                                                                                                                                                                 |



**SERVICE STATISTICS** Now I want to ask about service statistics for the following contraceptive methods. For each method I ask about, please tell me the number of new acceptors/users and the number of resupply/continuing users for both the last month and the last 12 months.

| Q42. METHOD<br><br>ONLY ASK ABOUT THOSE METHODS THAT ARE OFFERED IN Q36a. | Q42a.<br>Number of <u>new</u> acceptors / users last month | Q42b.<br>Number of <u>resupply</u> / <u>continuing clients</u> last month | Q42c.<br>INDICATE FROM WHERE STATISTICS COME FOR Q42a AND Q42b<br><br>IF BOTH Q42a AND Q42b EQUAL 9993, SKIP TO Q42d                                                 | Q42d.<br>Number of <u>new</u> acceptors/users last 12 months | Q42e.<br>RECORD THE NUMBER OF MONTHS OF DATA REPRESENTED IN Q42d | Q42f.<br>INDICATE FROM WHERE STATISTICS COME FOR Q42d                                                                                                                                                                           | Q42g.<br>Number of <u>resupply</u> / <u>continuing clients</u> last 12 months | Q42h.<br>RECORD THE NUMBER OF MONTHS OF DATA REPRESENTED IN Q42g | Q42i.<br>INDICATE FROM WHERE STATISTICS COME FOR Q42g |
|---------------------------------------------------------------------------|------------------------------------------------------------|---------------------------------------------------------------------------|----------------------------------------------------------------------------------------------------------------------------------------------------------------------|--------------------------------------------------------------|------------------------------------------------------------------|---------------------------------------------------------------------------------------------------------------------------------------------------------------------------------------------------------------------------------|-------------------------------------------------------------------------------|------------------------------------------------------------------|-------------------------------------------------------|
| (10) Male sterilization                                                   | [         ]<br><br>NOT AVAILABLE.....<br>9993 → Q42d       |                                                                           | OBSERVED, COUNTED IN REGISTER.....1<br>OBSERVED, REGISTER MONTHLY TOTAL.....2<br>OBSERVED, FROM MONTHLY REPORT.....3<br>ESTIMATED.....4<br>OTHER:.....6<br>(SPECIFY) | [         ]<br><br>NOT AVAILABLE ...9993 → (11)              | [     ]                                                          | OBSERVED, COUNTED IN REGISTER.....1<br>OBSERVED, SUMMED FROM REGISTER MONTHLY TOTALS.....2<br>OBSERVED, SUMMED FROM MONTHLY REPORTS.....3<br>OBSERVED, FROM YEARLY REPORT.....4<br>ESTIMATED.....5<br>OTHER:.....6<br>(SPECIFY) |                                                                               |                                                                  |                                                       |
| (11) SDM/Cycle beads                                                      | [         ]<br><br>NOT AVAILABLE.....<br>9993 → Q42d       |                                                                           | OBSERVED, COUNTED IN REGISTER.....1<br>OBSERVED, REGISTER MONTHLY TOTAL.....2<br>OBSERVED, FROM MONTHLY REPORT.....3<br>ESTIMATED.....4<br>OTHER:.....6<br>(SPECIFY) | [         ]<br><br>NOT AVAILABLE ...9993 → (12)              | [     ]                                                          | OBSERVED, COUNTED IN REGISTER.....1<br>OBSERVED, SUMMED FROM REGISTER MONTHLY TOTALS.....2<br>OBSERVED, SUMMED FROM MONTHLY REPORTS.....3<br>OBSERVED, FROM YEARLY REPORT.....4<br>ESTIMATED.....5<br>OTHER:.....6<br>(SPECIFY) |                                                                               |                                                                  |                                                       |
| (12) LAM                                                                  | [         ]<br><br>NOT AVAILABLE.....<br>9993 → Q42d       |                                                                           | OBSERVED, COUNTED IN REGISTER.....1<br>OBSERVED, REGISTER MONTHLY TOTAL.....2<br>OBSERVED, FROM MONTHLY REPORT.....3<br>ESTIMATED.....4<br>OTHER:.....6<br>(SPECIFY) | [         ]<br><br>NOT AVAILABLE ...9993 → (13)              | [     ]                                                          | OBSERVED, COUNTED IN REGISTER.....1<br>OBSERVED, SUMMED FROM REGISTER MONTHLY TOTALS.....2<br>OBSERVED, SUMMED FROM MONTHLY REPORTS.....3<br>OBSERVED, FROM YEARLY REPORT.....4<br>ESTIMATED.....5<br>OTHER:.....6<br>(SPECIFY) |                                                                               |                                                                  |                                                       |

**SERVICE STATISTICS** Now I want to ask about service statistics for the following contraceptive methods. For each method I ask about, please tell me the number of new acceptors/users and the number of resupply/continuing users for both the last month and the last 12 months.

| Q42. METHOD<br><br>ONLY ASK ABOUT THOSE METHODS THAT ARE OFFERED IN Q36a. | Q42a.<br>Number of <u>new acceptors / users</u> last month | Q42b.<br>Number of <u>resupply / continuing clients</u> last month | Q42c.<br>INDICATE FROM WHERE STATISTICS COME FOR Q42a AND Q42b<br><br>IF BOTH Q42a AND Q42b EQUAL 9993, SKIP TO Q42d                                                 | Q42d.<br>Number of <u>new acceptors/users</u> last 12 months | Q42e.<br>RECORD THE NUMBER OF MONTHS OF DATA REPRESENTED IN Q42d | Q42f.<br>INDICATE FROM WHERE STATISTICS COME FOR Q42d                                                                                                                                                                           | Q42g.<br>Number of <u>resupply / continuing clients</u> last 12 months | Q42h.<br>RECORD THE NUMBER OF MONTHS OF DATA REPRESENTED IN Q42g | Q42i.<br>INDICATE FROM WHERE STATISTICS COME FOR Q42g                                                                                                                                                                           |
|---------------------------------------------------------------------------|------------------------------------------------------------|--------------------------------------------------------------------|----------------------------------------------------------------------------------------------------------------------------------------------------------------------|--------------------------------------------------------------|------------------------------------------------------------------|---------------------------------------------------------------------------------------------------------------------------------------------------------------------------------------------------------------------------------|------------------------------------------------------------------------|------------------------------------------------------------------|---------------------------------------------------------------------------------------------------------------------------------------------------------------------------------------------------------------------------------|
| (13) Other (Specify)<br><br>_____                                         | [           ]<br><br>NOT AVAILABLE...9993                  | [           ]<br><br>NOT AVAILABLE...9993                          | OBSERVED, COUNTED IN REGISTER.....1<br>OBSERVED, REGISTER MONTHLY TOTAL.....2<br>OBSERVED, FROM MONTHLY REPORT.....3<br>ESTIMATED.....4<br>OTHER:.....6<br>(SPECIFY) | [           ]<br><br>NOT AVAILABLE ...9993 → (Q42j)          | [     ]                                                          | OBSERVED, COUNTED IN REGISTER.....1<br>OBSERVED, SUMMED FROM REGISTER MONTHLY TOTALS.....2<br>OBSERVED, SUMMED FROM MONTHLY REPORTS.....3<br>OBSERVED, FROM YEARLY REPORT.....4<br>ESTIMATED.....5<br>OTHER:.....6<br>(SPECIFY) | [           ]<br><br>NOT AVAILABLE ...9993 → (Q42j)                    | [     ]                                                          | OBSERVED, COUNTED IN REGISTER.....1<br>OBSERVED, SUMMED FROM REGISTER MONTHLY TOTALS.....2<br>OBSERVED, SUMMED FROM MONTHLY REPORTS.....3<br>OBSERVED, FROM YEARLY REPORT.....4<br>ESTIMATED.....5<br>OTHER:.....6<br>(SPECIFY) |

| TRAINING AND PARTNERSHIPS |                                                                                                                                                                                   |                                                                                                                                                                                                                                                                              |                        |
|---------------------------|-----------------------------------------------------------------------------------------------------------------------------------------------------------------------------------|------------------------------------------------------------------------------------------------------------------------------------------------------------------------------------------------------------------------------------------------------------------------------|------------------------|
| Q42j                      | Does this facility have a budget for staff FP training?                                                                                                                           | YES ..... 1<br>NO ..... 2<br>DON'T KNOW ..... 8                                                                                                                                                                                                                              | →<br>→<br>Q42I<br>Q42I |
| Q42k                      | About how often does this facility sponsor FP trainings?                                                                                                                          | WEEKLY ..... 1<br>MONTHLY ..... 2<br>QUARTERLY ..... 3<br>ANNUALLY ..... 4<br>OTHER ..... 6<br>(SPECIFY)<br>DON'T KNOW ..... 8                                                                                                                                               |                        |
| Q42l                      | What organizations provide FP training at this facility?<br><br><b>MULTIPLE RESPONSES POSSIBLE.<br/>CIRCLE ALL MENTIONED.</b>                                                     | NURHI/FPPN ..... A<br>UNFPA ..... B<br>WHO ..... C<br>SFH ..... D<br>JHPIEGO ..... E<br>MARIE STOPES ..... F<br>PATH ..... G<br>PPFN ..... H<br>STATE/ MOH ..... I<br>MCHIP ..... J<br>TSHIP ..... K<br>OTHER<br>(SPECIFY) ..... X<br><br>NONE ..... Y<br>DON'T KNOW ..... Z |                        |
| Q42m                      | What organizations provide in-kind resources to this facility for FP (ie: sample FP methods, job aids, etc)?<br><br><b>MULTIPLE RESPONSES POSSIBLE.<br/>CIRCLE ALL MENTIONED.</b> | NURHI/FPPN ..... A<br>UNFPA ..... B<br>WHO ..... C<br>SFH ..... D<br>JHPIEGO ..... E<br>MARIE STOPES ..... F<br>PATH ..... G<br>PPFN ..... H<br>STATE/ MOH ..... I<br>MCHIP ..... J<br>TSHIP ..... K<br>OTHER<br>(SPECIFY) ..... X<br><br>NONE ..... Y<br>DON'T KNOW ..... Z |                        |
| Q42n                      | What organizations provide financial resources to this facility for FP?<br><br><b>MULTIPLE RESPONSES POSSIBLE.<br/>CIRCLE ALL MENTIONED.</b>                                      | NURHI/FPPN ..... A<br>UNFPA ..... B<br>WHO ..... C<br>SFH ..... D<br>JHPIEGO ..... E<br>MARIE STOPES ..... F<br>PATH ..... G<br>PPFN ..... H<br>STATE/ MOH ..... I<br>MCHIP ..... J<br>TSHIP ..... K<br>OTHER<br>(SPECIFY) ..... X<br><br>NONE ..... Y<br>DON'T KNOW ..... Z |                        |

| IEC MATERIALS AND OUTREACH ACTIVITIES |                                                                                                                                                                        |                                 |                                    |                                                                                                          |                  |               |
|---------------------------------------|------------------------------------------------------------------------------------------------------------------------------------------------------------------------|---------------------------------|------------------------------------|----------------------------------------------------------------------------------------------------------|------------------|---------------|
| Q43.                                  | Are the following family planning IEC materials displayed and/or available for use?                                                                                    | OBSERVED,<br>with NURHI<br>logo | OBSERVED,<br>with no NURHI<br>logo | REPORTED,<br>NOT SEEN                                                                                    | NOT<br>AVAILABLE | DON'T<br>KNOW |
|                                       | a) Posters                                                                                                                                                             | 0                               | 1                                  | 2                                                                                                        | 3                | 8             |
|                                       | b) Informational flip chart                                                                                                                                            | 0                               | 1                                  | 2                                                                                                        | 3                | 8             |
|                                       | c) Brochures/pamphlets                                                                                                                                                 | 0                               | 1                                  | 2                                                                                                        | 3                | 8             |
|                                       | d) Information sheets                                                                                                                                                  | 0                               | 1                                  | 2                                                                                                        | 3                | 8             |
|                                       | e) Job aids                                                                                                                                                            | 0                               | 1                                  | 2                                                                                                        | 3                | 8             |
|                                       | f) Demonstration models                                                                                                                                                |                                 | 1                                  | 2                                                                                                        | 3                | 8             |
|                                       | g) Counseling cards                                                                                                                                                    | 0                               | 1                                  | 2                                                                                                        | 3                | 8             |
|                                       | h) Samples of various FP methods                                                                                                                                       |                                 | 1                                  | 2                                                                                                        | 3                | 8             |
|                                       | i) Other (specify) _____                                                                                                                                               | 0                               | 1                                  | 2                                                                                                        | 3                | 8             |
| Q44.                                  | Does this facility have a health outreach program for IEC (Information, Education and Communication)?                                                                  |                                 |                                    | Yes .....1<br>No ..... 2 → <b>Q48</b><br>Don't know.....8 → <b>Q48</b>                                   |                  |               |
| Q45.                                  | Does this outreach program discuss family planning/birth spacing?                                                                                                      |                                 |                                    | Yes ..... 1<br>No ..... 2<br>Don't know.....8                                                            |                  |               |
| Q46.                                  | How many communities are regularly visited through this outreach program?                                                                                              |                                 |                                    | NUMBER ..... [ ][ ]                                                                                      |                  |               |
| Q47.                                  | About how often are these communities visited through this outreach program?                                                                                           |                                 |                                    | WEEKLY.....1<br>MONTHLY ..... 2<br>QUARTERLY ..... 3<br>ANNUALLY ..... 4<br>OTHER ..... 6<br>(Specify)   |                  |               |
| Q48.                                  | Does this facility give health talks for members of the community?                                                                                                     |                                 |                                    | Yes ..... 1<br>No ..... 2 → <b>Q52</b><br>Don't know.....8 → <b>Q52</b>                                  |                  |               |
| Q49.                                  | Has this facility ever given a health talk on family planning/birth spacing to the community?                                                                          |                                 |                                    | Yes .....1<br>No ..... 2<br>Don't know.....8                                                             |                  |               |
| Q50.                                  | How often does this facility give health talks to the community?                                                                                                       |                                 |                                    | EVERY DAY ..... 1<br>WEEKLY ..... 2<br>MONTHLY.....3<br>QUARTERLY.....4<br>OTHER ..... 6<br>(Specify)    |                  |               |
| Q51.                                  | How often do the topics of the health talks change?                                                                                                                    |                                 |                                    | EVERY DAY ..... 1<br>WEEKLY ..... 2<br>MONTHLY.....3<br>QUARTERLY.....4<br>OTHER ..... 6<br>(Specify)    |                  |               |
| Q51a                                  | Does this facility have a budget for community FP clinical outreach, i.e. where providers from this facility provide FP services at community sites or mobile clinics? |                                 |                                    | YES ..... 1<br>NO ..... 2<br>DON'T KNOW.....8                                                            |                  |               |
| Q51b                                  | Does this facility have a budget for community FP in-reach efforts, i.e. where providers from this facility provide FP services at another health facility?            |                                 |                                    | YES ..... 1<br>NO ..... 2<br>DON'T KNOW.....8                                                            |                  |               |
| Q52.                                  | Does this facility supervise CBDs (community-based distributors of contraceptives)?                                                                                    |                                 |                                    | YES ..... 1<br>NO ..... 2 → <b>Q54</b>                                                                   |                  |               |
| Q53.                                  | What organization sponsors the CBDs?<br><br><b>CIRCLE ALL THAT APPLY</b>                                                                                               |                                 |                                    | MOH .....A<br>MARIE STOPES .....B<br>PPFN.....C<br>SFH.....D<br>NURHI.....E<br>OTHER .....X<br>(SPECIFY) |                  |               |

**QUALITY ASSURANCE/STANDARD OPERATING PROCEDURES**

Now I want to ask about common quality assurance activities and guidelines. For each activity or guideline mentioned, please tell me if this exists anywhere in the facility.

IF QUALITY ASSURANCE ACTIVITIES ARE REPORTED TO BE CARRIED OUT, ASK: Can I see some document or record that shows this has been carried out during the past year?

A REPORT OR MINUTES OF A MEETING WHICH MENTIONS THE QUALITY ASSURANCE ACTIVITY IS ACCEPTABLE.

|                              |                                                                                                                                                 |                                                                                                                      |                            |
|------------------------------|-------------------------------------------------------------------------------------------------------------------------------------------------|----------------------------------------------------------------------------------------------------------------------|----------------------------|
| Q54.                         | Are there any written guidelines or service protocols in this facility for family planning services?                                            | Yes, document observed.....1<br>Yes, document reported but not seen.....2<br>No.....3 →<br>Don't know .....8 →       | <b>Q56</b><br><b>Q56</b>   |
| Q55.                         | Who is the author of these guidelines or service protocols you are using?<br>NAME OF GUIDELINES: _____<br>_____<br>_____                        | Facility created guidelines.....A<br>WHO guidelines.....B<br>FMOH guidelines.....C<br>Other _____X<br>(Specify)      |                            |
| <b>CHOOSE ALL THAT APPLY</b> |                                                                                                                                                 |                                                                                                                      |                            |
| Q56.                         | Are there any written guidelines or service protocols in this facility for the integration of family planning and HIV services?                 | Yes, document observed.....1<br>Yes, document reported but not seen.....2<br>No.....3<br>Don't know .....8           |                            |
| Q57.                         | Are you using any guideline(s) or tool(s) to screen patients for pregnancy?                                                                     | Yes, document observed.....1<br>Yes, document reported but not seen.....2<br>No.....3 →<br>Don't know .....8 →       | <b>Q59</b><br><b>Q59</b>   |
| Q58.                         | Do these guideline(s) recommend that you screen all patients for pregnancy before dispensing a new family planning method?                      | Yes .....1<br>No .....2<br>Other guidance provided<br>_____6<br>(Specify)<br>Don't know.....8                        |                            |
| Q59.                         | Do any of the guidelines recommend that family planning counseling is offered to most clients in this facility as a routine or normal practice? | Yes .....1<br>No .....2<br>No guidelines.....3<br>Other guidance provided<br>_____6<br>(Specify)<br>Don't know.....8 |                            |
| Q60.                         | Are periodic audits or reports of medical records or service registers conducted/compiled at least quarterly?                                   | Yes, document observed.....1<br>Yes, document reported but not seen.....2<br>No.....3<br>Don't know .....8           |                            |
| Q61.                         | Does this facility receive integrated supportive supervision visit?                                                                             | Yes .....1<br>No .....2 →<br>Don't know.....8 →                                                                      | <b>Q63</b><br><b>Q63</b>   |
| Q62.                         | How often does this facility receive integrated supportive supervision?                                                                         | Once in month ..... 1<br>Once in three months ..... 2<br>Once every six months.....3<br>Less frequently .....4       |                            |
| Q63.                         | Is there any type of quality assurance committee or staff meetings that assure quality control for family planning service delivery?            | Yes, document observed.....1<br>Yes, document reported but not seen.....2<br>No.....3 →<br>Don't know .....8 →       | <b>Q63b</b><br><b>Q63b</b> |
| Q63a                         | How often do the quality assurance committee or staff meetings occur to assure quality control for FP service delivery?                         | Once in month ..... 1<br>Once in three months ..... 2<br>Once every six months.....3<br>Less frequently .....4       |                            |
| Q63b                         | Has anyone from this facility participated in the quarterly Facility Committee Meetings/NURHI QIT?                                              | YES ..... 1<br>NO ..... 2<br>DON'T KNOW.....8                                                                        |                            |
| Q64.                         | Are HMIS tools made available to relevant staff?                                                                                                | Yes, document observed.....1<br>Yes, document reported but not seen.....2<br>No.....3<br>Don't know .....8           |                            |

Now, I would like to ask you some questions about the physical infrastructure and equipment that you have at this facility.

**PHYSICAL INFRASTRUCTURE AND EQUIPMENT**

Are the following types of facilities/equipment available on a functioning basis at the service location?

INTERVIEWER NEEDS TO CHECK FUNCTIONING WHERE POSSIBLE.

|      |                                                                                  |                                                                                                                                                                                                                                       |                                      |                                  |
|------|----------------------------------------------------------------------------------|---------------------------------------------------------------------------------------------------------------------------------------------------------------------------------------------------------------------------------------|--------------------------------------|----------------------------------|
| Q65. | DOES THIS FACILITY HAVE A SIGN POSTED WITH ITS HOURS OF OPERATION AND SERVICES?  | Observed, both hours and services. . . . .1<br>Observed, hours only.....2<br>Observed, services only.....3<br>Reported, both hours and services.....4<br>Reported, hours only.....5<br>Reported, services only.....6<br>No sign.....7 |                                      |                                  |
|      |                                                                                  | <b>Not Available</b>                                                                                                                                                                                                                  | <b>Available but not functioning</b> | <b>Available and functioning</b> |
| Q66  | Dedicated Family planning service space                                          | 1                                                                                                                                                                                                                                     | 2                                    | 3                                |
| Q66a | Adequate seating in waiting area                                                 | 1                                                                                                                                                                                                                                     | 2                                    | 3                                |
| Q66b | Ceiling fans                                                                     | 1                                                                                                                                                                                                                                     | 2                                    | 3                                |
| Q66c | Notice board                                                                     | 1                                                                                                                                                                                                                                     | 2                                    | 3                                |
| Q67. | Electricity                                                                      | 1                                                                                                                                                                                                                                     | 2                                    | 3                                |
| Q68. | Back-up generator                                                                | 1                                                                                                                                                                                                                                     | 2                                    | 3                                |
| Q69. | Piped water supply                                                               | 1                                                                                                                                                                                                                                     | 2                                    | 3                                |
| Q70. | Toilet facilities/latrine                                                        | 1                                                                                                                                                                                                                                     | 2                                    | 3                                |
| Q71. | Telephone/GSM (dedicated to the facility)                                        | 1                                                                                                                                                                                                                                     | 2                                    | 3                                |
| Q72. | Storage area for drugs and supplies                                              | 1                                                                                                                                                                                                                                     | 2                                    | 3                                |
| Q73. | Sharps container for needles                                                     | 1                                                                                                                                                                                                                                     | 2                                    | 3                                |
| Q74. | Laboratory                                                                       | 1                                                                                                                                                                                                                                     | 2                                    | 3                                |
| Q75. | Private examination room (ie, a private room for pelvic exams and IUD insertion) | 1                                                                                                                                                                                                                                     | 2                                    | 3                                |
| Q76. | Exam table for gynecological examination                                         | 1                                                                                                                                                                                                                                     | 2                                    | 3                                |
| Q77. | Examination light                                                                | 1                                                                                                                                                                                                                                     | 2                                    | 3                                |
| Q78. | Delivery room with bed and lighting                                              | 1                                                                                                                                                                                                                                     | 2                                    | 3                                |
| Q79. | Operating theatre with basic/required equipment                                  | 1                                                                                                                                                                                                                                     | 2                                    | 3                                |
| Q80. | Weighing scale for adults                                                        | 1                                                                                                                                                                                                                                     | 2                                    | 3                                |
| Q81. | Infant weighing scale                                                            | 1                                                                                                                                                                                                                                     | 2                                    | 3                                |
| Q82. | Blood pressure apparatus                                                         | 1                                                                                                                                                                                                                                     | 2                                    | 3                                |
| Q83. | Stethoscope                                                                      | 1                                                                                                                                                                                                                                     | 2                                    | 3                                |
| Q84. | Fetal stethoscope                                                                | 1                                                                                                                                                                                                                                     | 2                                    | 3                                |
| Q85. | Sterilizer                                                                       | 1                                                                                                                                                                                                                                     | 2                                    | 3                                |
| Q86. | Microscope                                                                       | 1                                                                                                                                                                                                                                     | 2                                    | 3                                |
| Q87. | Oxygen apparatus                                                                 | 1                                                                                                                                                                                                                                     | 2                                    | 3                                |
| Q88. | Centrifuge                                                                       | 1                                                                                                                                                                                                                                     | 2                                    | 3                                |
| Q89. | Thermometer                                                                      | 1                                                                                                                                                                                                                                     | 2                                    | 3                                |
| Q90. | Scalpels                                                                         | 1                                                                                                                                                                                                                                     | 2                                    | 3                                |
| Q91. | Two pairs of scissors                                                            | 1                                                                                                                                                                                                                                     | 2                                    | 3                                |
| Q92. | Long needle holder                                                               | 1                                                                                                                                                                                                                                     | 2                                    | 3                                |
| Q93. | Forceps                                                                          | 1                                                                                                                                                                                                                                     | 2                                    | 3                                |
| Q94. | Sponge holding forceps                                                           | 1                                                                                                                                                                                                                                     | 2                                    | 3                                |
| Q95. | Tenacula (Volsellum forceps)                                                     | 1                                                                                                                                                                                                                                     | 2                                    | 3                                |
| Q96. | Vaginal speculum (small size)                                                    | 1                                                                                                                                                                                                                                     | 2                                    | 3                                |

|       |                                                   | Not Available | Available but not functioning | Available and functioning |
|-------|---------------------------------------------------|---------------|-------------------------------|---------------------------|
| Q97.  | Vaginal speculum (medium size)                    | 1             | 2                             | 3                         |
| Q98.  | Vaginal speculum (large size)                     | 1             | 2                             | 3                         |
| Q99.  | Minor surgery kit (e.g. artery forceps, hemostat) | 1             | 2                             | 3                         |
| Q100. | Vacuum extractor                                  | 1             | 2                             | 3                         |
| Q101. | Manual vacuum aspiration (MVA) kit                | 1             | 2                             | 3                         |
| Q102. | Minilaparotomy kit                                | 1             | 2                             | 3                         |
| Q103. | Uterine hook                                      | 1             | 2                             | 3                         |
| Q104. | Tubal hook                                        | 1             | 2                             | 3                         |
| Q105. | Vasectomy kit                                     | 1             | 2                             | 3                         |
| Q106. | Uterine sounds                                    | 1             | 2                             | 3                         |
| Q107. | Canula and trochar for inserting implants         | 1             | 2                             | 3                         |

Now, I would like to ask you some questions about the physical infrastructure and equipment that you have at this facility.

### CONSUMABLE SUPPLIES

Are the following types of supplies available on a regular basis at the service location?

INTERVIEWER NEEDS TO CHECK AVAILABILITY WHERE POSSIBLE.

|       |                                                             | Not Available | Available sometimes but not on a regular basis | Available all of the time |
|-------|-------------------------------------------------------------|---------------|------------------------------------------------|---------------------------|
| Q108. | Sutures                                                     | 1             | 2                                              | 3                         |
| Q109. | Antiseptic solution (such as iodine)                        | 1             | 2                                              | 3                         |
| Q110. | Methylated spirit                                           | 1             | 2                                              | 3                         |
| Q111. | Sterile gauze pad or cotton wool                            | 1             | 2                                              | 3                         |
| Q112. | Sterile disposable latex gloves                             | 1             | 2                                              | 3                         |
| Q113. | Long gloves                                                 | 1             | 2                                              | 3                         |
| Q114. | Disposable sterile syringes and needles                     | 1             | 2                                              | 3                         |
| Q115. | Intravenous kit                                             | 1             | 2                                              | 3                         |
| Q116. | Scalpel blades                                              | 1             | 2                                              | 3                         |
| Q117. | Sealed implants pack (for performing FP implant insertions) | 1             | 2                                              | 3                         |
| Q118. | Sedatives (such as Valium)                                  | 1             | 2                                              | 3                         |
| Q119. | Atropine (such as Buscopan)                                 | 1             | 2                                              | 3                         |
| Q120. | Opioid analgesic                                            | 1             | 2                                              | 3                         |
| Q121. | Local anesthetic (such as lignocaine)                       | 1             | 2                                              | 3                         |

|      |                                                                                                 |                                                                                 |        |
|------|-------------------------------------------------------------------------------------------------|---------------------------------------------------------------------------------|--------|
| Q122 | CHECK Q11A(22):<br><br>FACILITY PROVIDES FP SERVICES<br>(Q11A(22)=YES) <input type="checkbox"/> | FACILITY DOES NOT PROVIDE FP SERVICES<br>(Q11A(22)=NO) <input type="checkbox"/> | → Q132 |
|------|-------------------------------------------------------------------------------------------------|---------------------------------------------------------------------------------|--------|

**STORAGE:** Now I would like to see the place where contraceptive methods are stored. We are just trying to get an idea of how facilities keep their stock and store contraceptive methods. Remember that my findings will be just used for research purposes and will be kept strictly confidential.

|       |                                                                                                                                                                                                                                                                                                      |                                                                                                                                                                                                                              |        |
|-------|------------------------------------------------------------------------------------------------------------------------------------------------------------------------------------------------------------------------------------------------------------------------------------------------------|------------------------------------------------------------------------------------------------------------------------------------------------------------------------------------------------------------------------------|--------|
| Q123. | OBSERVE WHETHER ALL THE CONTRACEPTIVE METHODS ARE PROTECTED FROM WATER OR DAMPNESS                                                                                                                                                                                                                   | YES ..... 1<br>NO ..... 2<br>CANNOT OBSERVE STORAGE AREA.....3                                                                                                                                                               | → Q129 |
| Q124. | OBSERVE WHETHER ALL THE CONTRACEPTIVE METHODS ARE OFF THE FLOOR                                                                                                                                                                                                                                      | YES ..... 1<br>NO ..... 2                                                                                                                                                                                                    |        |
| Q125. | OBSERVE WHETHER THE CEILING ABOVE THE CONTRACEPTIVE METHODS IS INTACT AND NOT LEAKING                                                                                                                                                                                                                | YES ..... 1<br>NO ..... 2                                                                                                                                                                                                    |        |
| Q126. | OBSERVE WHETHER ALL THE CONTRACEPTIVE METHODS ARE PROTECTED FROM THE SUN.                                                                                                                                                                                                                            | YES ..... 1<br>NO ..... 2                                                                                                                                                                                                    |        |
| Q127. | OBSERVE WHETHER THE ROOM IS CLEAN OF EVIDENCE OF RODENTS (BATS, RATS) OR PESTS (ROACHES, ETC).                                                                                                                                                                                                       | YES ..... 1<br>NO ..... 2                                                                                                                                                                                                    |        |
| Q128. | OBSERVE WHETHER THE INJECTABLES ARE STORED UPRIGHT.                                                                                                                                                                                                                                                  | YES ..... 1<br>NO ..... 2<br>NOT APPLICABLE/DON'T PROVIDE INJECTABLES.....7                                                                                                                                                  |        |
| Q129. | Does the pharmacy separate damaged and/or expired family planning methods from the usable products, and remove them from the inventory?<br><br>IF YES, ASK TO SEE EVIDENCE OF EACH OF THE INDICATED PRACTICES AND ALL THAT WERE OBSERVED. ALSO ASK FOR THE TALLY CARD TO CHECK FOR RECORDED BALANCE. | YES, DAMAGED/EXPIRED ITEM REMOVED FROM INVENTORY ..... 1<br><br>REMOVED FROM SHELVES AND NO EXPIRED ITEMS PRESENT..... 2<br><br>EXPIRED ITEMS OBSERVED ..... 3<br><br>REPORTED YES BUT CANNOT OBSERVE....4<br><br>NO ..... 5 |        |



| Now I would like to ask you about your specific stocks of different family planning methods/products.<br>ONLY ASK ABOUT THOSE METHODS THAT ARE AVAILABLE FROM Q36a. |                                                                                                                                                     |                                                                                                                                                                      |                                                                                                                                                                           |                                                                                                                                                                      |                                                                                                                                              |                                                                                                                                       |                                                                                                                                                     |                                                             |
|---------------------------------------------------------------------------------------------------------------------------------------------------------------------|-----------------------------------------------------------------------------------------------------------------------------------------------------|----------------------------------------------------------------------------------------------------------------------------------------------------------------------|---------------------------------------------------------------------------------------------------------------------------------------------------------------------------|----------------------------------------------------------------------------------------------------------------------------------------------------------------------|----------------------------------------------------------------------------------------------------------------------------------------------|---------------------------------------------------------------------------------------------------------------------------------------|-----------------------------------------------------------------------------------------------------------------------------------------------------|-------------------------------------------------------------|
| CONTRACEPTIVE                                                                                                                                                       | Q130a. Where does your stock of CONTRACEPTIVE come from? CHOOSE ALL.                                                                                | Q130b. When was the last time that you received a routine supply of CONTRACEPTIVE either that you ordered, or that is part of your routine supply system? READ LIST. | Q130c. Does this facility determine the quantity of each CONTRACEPTIVE that it needs and order that, or is the quantity that you receive determined elsewhere? READ LIST. | Q130d. Do you always receive a standard fixed quantity of CONTRACEPTIVE or does the quantity you receive vary according to recent need or activity level? READ LIST. | Q130e. <b>CHECK Q130c. IF Q130c IS "2", SKIP TO Q130g</b><br>When you order CONTRACEPTIVE, how much do you order? READ LIST.                 | Q130f. When do you decide to order CONTRACEPTIVE? READ LIST.                                                                          | Q130g. On average, how long does it take to receive your supplies after you have placed an order? READ LIST.                                        | Q130h. Is METHOD usually delivered or must you go get them? |
| (01) Combination oral contraceptives (estrogen and progestin)                                                                                                       | Govt..... A<br>Intl NGO ..... B<br>Local NGO.....C<br>Pharmacy wholesaler/ dealer/distributor.....D<br>Other.....X<br>(Specify)<br>Don't know.....Z | < 4 wks ago.....1<br>Between 4-12 wks.....2<br>> 12 wks ago.....3<br>No routine supply system.....4<br>Don't know.....8                                              | Determines own need...1→(Q130e)<br>Determined Elsewhere.....2<br>Both.....3<br>Don't know .....8 →(Q130g)                                                                 | Quantity based on activity level.....1<br>Standard fixed supply.....2<br>Don't know.....8                                                                            | Order to maintain stock.....1<br>Order same amount.....2<br>Order based on consumption.....3<br>Other.....6<br>(Specify)<br>Don't know.....8 | Fall below predetermined level.....1<br>Fixed time – Every [ ] days.....2<br>Order when needed...3<br>Other.....6<br>Don't know.....8 | One week or less.....1<br>Between 2-4 weeks...2<br>Between 5-8 weeks...3<br>More than 8 weeks...4<br>Other.....6<br>(Specify)<br>Don't know . ....8 | Delivered .....1<br>Pick them up...2<br>Both .....3         |
| (02) Progestin-only oral contraceptives                                                                                                                             | Govt..... A<br>Intl NGO ..... B<br>Local NGO.....C<br>Pharmacy wholesaler/ dealer/distributor.....D<br>Other.....X<br>(Specify)<br>Don't know.....Z | < 4 wks ago.....1<br>Between 4-12 wks.....2<br>> 12 wks ago.....3<br>No routine supply system.....4<br>Don't know.....8                                              | Determines own Need...1→(Q130e)<br>Determined Elsewhere.....2<br>Both.....3<br>Don't know .....8 →(Q130g)                                                                 | Quantity based on activity level.....1<br>Standard fixed supply.....2<br>Don't know.....8                                                                            | Order to maintain stock.....1<br>Order same amount.....2<br>Order based on consumption.....3<br>Other.....6<br>(Specify)<br>Don't know.....8 | Fall below predetermined level.....1<br>Fixed time – Every [ ] days.....2<br>Order when needed...3<br>Other.....6<br>Don't know.....8 | One week or less.....1<br>Between 2-4 weeks...2<br>Between 5-8 weeks...3<br>More than 8 weeks...4<br>Other.....6<br>(Specify)<br>Don't know . ....8 | Delivered .....1<br>Pick them up...2<br>Both .....3         |
| (03) Emergency contraceptives                                                                                                                                       | Govt..... A<br>Intl NGO ..... B<br>Local NGO.....C<br>Pharmacy wholesaler/ dealer/distributor.....D<br>Other.....X<br>(Specify)<br>Don't know.....Z | < 4 wks ago.....1<br>Between 4-12 wks.....2<br>> 12 wks ago.....3<br>No routine supply system.....4<br>Don't know.....8                                              | Determines own need...1→(Q130e)<br>Determined Elsewhere.....2<br>Both.....3<br>Don't know .....8 →(Q130g)                                                                 | Quantity based on activity level.....1<br>Standard fixed supply.....2<br>Don't know.....8                                                                            | Order to maintain stock.....1<br>Order same amount.....2<br>Order based on consumption.....3<br>Other.....6<br>(Specify)<br>Don't know.....8 | Fall below predetermined level.....1<br>Fixed time – Every [ ] days.....2<br>Order when needed...3<br>Other.....6<br>Don't know.....8 | One week or less.....1<br>Between 2-4 weeks...2<br>Between 5-8 weeks...3<br>More than 8 weeks...4<br>Other.....6<br>(Specify)<br>Don't know . ....8 | Delivered .....1<br>Pick them up...2<br>Both .....3         |
| (04) Male condoms                                                                                                                                                   | Govt..... A<br>Intl NGO ..... B<br>Local NGO.....C<br>Pharmacy wholesaler/ dealer/distributor.....D<br>Other.....X<br>(Specify)<br>Don't know.....Z | < 4 wks ago.....1<br>Between 4-12 wks.....2<br>> 12 wks ago.....3<br>No routine supply system.....4<br>Don't know.....8                                              | Determines own need...1→(Q130e)<br>Determined Elsewhere.....2<br>Both.....3<br>Don't know .....8 →(Q130g)                                                                 | Quantity based on activity level.....1<br>Standard fixed supply.....2<br>Don't know.....8                                                                            | Order to maintain stock.....1<br>Order same amount.....2<br>Order based on consumption.....3<br>Other.....6<br>(Specify)<br>Don't know.....8 | Fall below predetermined level.....1<br>Fixed time – Every [ ] days.....2<br>Order when needed...3<br>Other.....6<br>Don't know.....8 | One week or less.....1<br>Between 2-4 weeks...2<br>Between 5-8 weeks...3<br>More than 8 weeks...4<br>Other.....6<br>(Specify)<br>Don't know . ....8 | Delivered .....1<br>Pick them up...2<br>Both .....3         |

| CONTRACEPTIVE                                     | Q130a. Where does your stock of CONTRACEPTIVE come from? CHOOSE ALL.                                                                                 | Q130b. When was the last time that you received a routine supply of CONTRACEPTIVE either that you ordered, or that is part of your routine supply system? READ LIST. | Q130c. Does this facility determine the quantity of each CONTRACEPTIVE that it needs and order that, or is the quantity that you receive determined elsewhere? READ LIST. | Q130d. Do you always receive a standard fixed quantity of CONTRACEPTIVE or does the quantity you receive vary according to recent need or activity level? READ LIST. | Q130e. <b>CHECK Q130C. IF Q130C IS "2", SKIP TO Q130G</b><br>When you order CONTRACEPTIVE, how much do you order? READ LIST.                 | Q130f. When do you decide to order CONTRACEPTIVE? READ LIST.                                                                         | Q130g. On average, how long does it take to receive your supplies after you have placed an order? READ LIST.                                         | Q130h. Is METHOD usually delivered or must you go get them? |
|---------------------------------------------------|------------------------------------------------------------------------------------------------------------------------------------------------------|----------------------------------------------------------------------------------------------------------------------------------------------------------------------|---------------------------------------------------------------------------------------------------------------------------------------------------------------------------|----------------------------------------------------------------------------------------------------------------------------------------------------------------------|----------------------------------------------------------------------------------------------------------------------------------------------|--------------------------------------------------------------------------------------------------------------------------------------|------------------------------------------------------------------------------------------------------------------------------------------------------|-------------------------------------------------------------|
| (05) Female condoms                               | Govt..... A<br>Intl NGO ..... B<br>Local NGO.....C<br>Pharmacy wholesaler/ dealer/ distributor.....D<br>Other.....X<br>(Specify)<br>Don't know.....Z | < 4 wks ago.....1<br>Between 4-12 wks.....2<br>> 12 wks ago.....3<br>No routine supply system.....4<br>Don't know.....8                                              | Determines own need...1→(Q130e)<br>Determined<br>Elsewhere.....2<br>Both.....3<br>Don't know .....8 →(Q130g)                                                              | Quantity based on activity level.....1<br>Standard fixed supply.....2<br>Don't know.....8                                                                            | Order to maintain stock.....1<br>Order same amount.....2<br>Order based on consumption.....3<br>Other.....6<br>(Specify)<br>Don't know.....8 | Fall below predetermined level.....1<br>Fixed time – Every [ ] days.....2<br>Order when needed..3<br>Other.....6<br>Don't know.....8 | One week or less.....1<br>Between 2-4 weeks...2<br>Between 5-8 weeks...3<br>More than 8 weeks....4<br>Other.....6<br>(Specify)<br>Don't know . ....8 | Delivered .....1<br>Pick them up...2<br>Both .....3         |
| (06) Injectables (e.g., Depo Provera, Noristerat) | Govt..... A<br>Intl NGO ..... B<br>Local NGO.....C<br>Pharmacy wholesaler/ dealer/ distributor.....D<br>Other.....X<br>(Specify)<br>Don't know.....Z | < 4 wks ago.....1<br>Between 4-12 wks.....2<br>> 12 wks ago.....3<br>No routine supply system.....4<br>Don't know.....8                                              | Determines own need...1→(Q130e)<br>Determined<br>Elsewhere.....2<br>Both.....3<br>Don't know .....8 →(Q130g)                                                              | Quantity based on activity level.....1<br>Standard fixed supply.....2<br>Don't know.....8                                                                            | Order to maintain stock.....1<br>Order same amount.....2<br>Order based on consumption.....3<br>Other.....6<br>(Specify)<br>Don't know.....8 | Fall below predetermined level.....1<br>Fixed time – Every [ ] days.....2<br>Order when needed..3<br>Other.....6<br>Don't know.....8 | One week or less.....1<br>Between 2-4 weeks...2<br>Between 5-8 weeks...3<br>More than 8 weeks....4<br>Other.....6<br>(Specify)<br>Don't know . ....8 | Delivered .....1<br>Pick them up...2<br>Both .....3         |
| (07) Implant (Norplant)                           | Govt..... A<br>Intl NGO ..... B<br>Local NGO.....C<br>Pharmacy wholesaler/ dealer/ distributor.....D<br>Other.....X<br>(Specify)<br>Don't know.....Z | < 4 wks ago.....1<br>Between 4-12 wks.....2<br>> 12 wks ago.....3<br>No routine supply system.....4<br>Don't know.....8                                              | Determines own need...1→(Q130e)<br>Determined<br>Elsewhere.....2<br>Both.....3<br>Don't know .....8 →(Q130g)                                                              | Quantity based on activity level.....1<br>Standard fixed supply.....2<br>Don't know.....8                                                                            | Order to maintain stock.....1<br>Order same amount.....2<br>Order based on consumption.....3<br>Other.....6<br>(Specify)<br>Don't know.....8 | Fall below predetermined level.....1<br>Fixed time – Every [ ] days.....2<br>Order when needed..3<br>Other.....6<br>Don't know.....8 | One week or less.....1<br>Between 2-4 weeks...2<br>Between 5-8 weeks...3<br>More than 8 weeks....4<br>Other.....6<br>(Specify)<br>Don't know . ....8 | Delivered .....1<br>Pick them up...2<br>Both .....3         |
| (08) IUCD                                         | Govt..... A<br>Intl NGO ..... B<br>Local NGO.....C<br>Pharmacy wholesaler/ dealer/ distributor.....D<br>Other.....X<br>(Specify)<br>Don't know.....Z | < 4 wks ago.....1<br>Between 4-12 wks.....2<br>> 12 wks ago.....3<br>No routine supply system.....4<br>Don't know.....8                                              | Determines own need...1→(Q130e)<br>Determined<br>Elsewhere.....2<br>Both.....3<br>Don't know .....8 →(Q130g)                                                              | Quantity based on activity level.....1<br>Standard fixed supply.....2<br>Don't know.....8                                                                            | Order to maintain stock.....1<br>Order same amount.....2<br>Order based on consumption.....3<br>Other.....6<br>(Specify)<br>Don't know.....8 | Fall below predetermined level.....1<br>Fixed time – Every [ ] days.....2<br>Order when needed..3<br>Other.....6<br>Don't know.....8 | One week or less.....1<br>Between 2-4 weeks...2<br>Between 5-8 weeks...3<br>More than 8 weeks....4<br>Other.....6<br>(Specify)<br>Don't know . ....8 | Delivered .....1<br>Pick them up...2<br>Both .....3         |

| CONTRACEPTIVE                 | Q130a. Where does your stock of CONTRACEPTIVE come from? CHOOSE ALL.                                                                                 | Q130b. When was the last time that you received a routine supply of CONTRACEPTIVE either that you ordered, or that is part of your routine supply system? READ LIST. | Q130c. Does this facility determine the quantity of each CONTRACEPTIVE that it needs and order that, or is the quantity that you receive determined elsewhere? READ LIST. | Q130d. Do you always receive a standard fixed quantity of CONTRACEPTIVE or does the quantity you receive vary according to recent need or activity level? READ LIST. | Q130e. <b>CHECK Q130C. IF Q130C IS "2", SKIP TO Q130G</b><br>When you order CONTRACEPTIVE, how much do you order? READ LIST.                 | Q130f. When do you decide to order CONTRACEPTIVE? READ LIST.                                                                         | Q130g. On average, how long does it take to receive your supplies after you have placed an order? READ LIST.                                         | Q130h. Is METHOD usually delivered or must you go get them? |
|-------------------------------|------------------------------------------------------------------------------------------------------------------------------------------------------|----------------------------------------------------------------------------------------------------------------------------------------------------------------------|---------------------------------------------------------------------------------------------------------------------------------------------------------------------------|----------------------------------------------------------------------------------------------------------------------------------------------------------------------|----------------------------------------------------------------------------------------------------------------------------------------------|--------------------------------------------------------------------------------------------------------------------------------------|------------------------------------------------------------------------------------------------------------------------------------------------------|-------------------------------------------------------------|
| (09) SDM/Cycle beads          | Govt..... A<br>Intl NGO ..... B<br>Local NGO.....C<br>Pharmacy wholesaler/ dealer/ distributor.....D<br>Other_____X<br>(Specify)<br>Don't know.....Z | < 4 wks ago.....1<br>Between 4-12 wks.....2<br>> 12 wks ago.....3<br>No routine supply system.....4<br>Don't know.....8                                              | Determines own need...1→(Q130e)<br>Determined<br>Elsewhere.....2<br>Both.....3<br>Don't know .....8 →(Q130g)                                                              | Quantity based on activity level.....1<br>Standard fixed supply.....2<br>Don't know.....8                                                                            | Order to maintain stock.....1<br>Order same amount.....2<br>Order based on consumption.....3<br>Other_____6<br>(Specify)<br>Don't know.....8 | Fall below predetermined level.....1<br>Fixed time – Every [ ] days.....2<br>Order when needed..3<br>Other.....6<br>Don't know.....8 | One week or less.....1<br>Between 2-4 weeks...2<br>Between 5-8 weeks...3<br>More than 8 weeks....4<br>Other_____6<br>(Specify)<br>Don't know . ....8 | Delivered .....1<br>Pick them up...2<br>Both .....3         |
| (10) Other (specify)<br>_____ | Govt..... A<br>Intl NGO ..... B<br>Local NGO.....C<br>Pharmacy wholesaler/ dealer/ distributor.....D<br>Other_____X<br>(Specify)<br>Don't know.....Z | < 4 wks ago.....1<br>Between 4-12 wks.....2<br>> 12 wks ago.....3<br>No routine supply system.....4<br>Don't know.....8                                              | Determines own need...1→(Q130e)<br>Determined<br>Elsewhere.....2<br>Both.....3<br>Don't know .....8 →(Q130g)                                                              | Quantity based on activity level.....1<br>Standard fixed supply.....2<br>Don't know.....8                                                                            | Order to maintain stock.....1<br>Order same amount.....2<br>Order based on consumption.....3<br>Other_____6<br>(Specify)<br>Don't know.....8 | Fall below predetermined level.....1<br>Fixed time – Every [ ] days.....2<br>Order when needed..3<br>Other.....6<br>Don't know.....8 | One week or less.....1<br>Between 2-4 weeks...2<br>Between 5-8 weeks...3<br>More than 8 weeks....4<br>Other_____6<br>(Specify)<br>Don't know . ....8 | Delivered .....1<br>Pick them up...2<br>Both .....3         |

Now I would like to ask you some more questions specifically about stock-outs of family planning methods.

**ONLY ASK ABOUT THOSE METHODS THAT ARE AVAILABLE FROM Q36a.**

| METHOD                       | Q131a. Is METHOD currently available? | Q131b. Has this facility had a stockout of METHOD that lasted at least 24 hours in the last <b>one year</b> ? | Q131c. If Yes, how many times has this facility had a stockout of METHOD in the past one year?<br><br>(CHECK if "Yes" to Q131b) | Q131d. If Yes, how many <b>total</b> days of stockout of METHOD did this facility experience in the past one year?<br><br>(CHECK if "Yes" to Q131b) | Q131e. SOURCE OF INFORMATION FOR STOCKOUTS IN PAST ONE YEAR: | Q131f. Has this facility had a stockout of METHOD that lasted at least 24 hours in the last 30 days (one month)? | Q131g. If Yes, how many times has this facility had a stockout of METHOD in the past 30 days?<br><br>(CHECK if "Yes" to Q131f) | Q131h. If Yes, how many <b>total</b> days of stockout of METHOD did this facility experience in the last 30 days?<br><br>(CHECK if "Yes" to Q131f) | Q131i. SOURCE OF INFORMATION ON STOCKOUTS IN PAST 30 DAYS: |
|------------------------------|---------------------------------------|---------------------------------------------------------------------------------------------------------------|---------------------------------------------------------------------------------------------------------------------------------|-----------------------------------------------------------------------------------------------------------------------------------------------------|--------------------------------------------------------------|------------------------------------------------------------------------------------------------------------------|--------------------------------------------------------------------------------------------------------------------------------|----------------------------------------------------------------------------------------------------------------------------------------------------|------------------------------------------------------------|
| (01) Combined oral pill      | YES .....1<br>NO .....2               | YES .....1<br>NO .....2<br>↓<br><b>(02)</b>                                                                   | Number...<br><input type="text"/> <input type="text"/><br>DON'T KNOW..98                                                        | Days...<br><input type="text"/> <input type="text"/> <input type="text"/><br>CONSTANT PROBLEM...995<br>DK.....998                                   | OBSERVED RECORD.....1<br>PROVIDER ESTIMATE.....2             | YES .....1<br>NO .....2<br>↓<br><b>(02)</b>                                                                      | Number...<br><input type="text"/> <input type="text"/><br>DON'T KNOW.....98                                                    | Days...<br><input type="text"/> <input type="text"/><br>DON'T KNOW..98                                                                             | OBSERVED RECORD.....1<br>PROVIDER ESTIMATE.....2           |
| (02) Progestin only pill     | YES .....1<br>NO .....2               | YES .....1<br>NO .....2<br>↓<br><b>(03)</b>                                                                   | Number...<br><input type="text"/> <input type="text"/><br>DON'T KNOW..98                                                        | Days...<br><input type="text"/> <input type="text"/> <input type="text"/><br>CONSTANT PROBLEM...995<br>DK.....998                                   | OBSERVED RECORD.....1<br>PROVIDER ESTIMATE.....2             | YES .....1<br>NO .....2<br>↓<br><b>(03)</b>                                                                      | Number...<br><input type="text"/> <input type="text"/><br>DON'T KNOW.....98                                                    | Days...<br><input type="text"/> <input type="text"/><br>DON'T KNOW..98                                                                             | OBSERVED RECORD.....1<br>PROVIDER ESTIMATE.....2           |
| (03) Emergency contraceptive | YES .....1<br>NO .....2               | YES .....1<br>NO .....2<br>↓<br><b>(04)</b>                                                                   | Number...<br><input type="text"/> <input type="text"/><br>DON'T KNOW..98                                                        | Days...<br><input type="text"/> <input type="text"/> <input type="text"/><br>CONSTANT PROBLEM...995<br>DK.....998                                   | OBSERVED RECORD.....1<br>PROVIDER ESTIMATE.....2             | YES .....1<br>NO .....2<br>↓<br><b>(04)</b>                                                                      | Number...<br><input type="text"/> <input type="text"/><br>DON'T KNOW.....98                                                    | Days...<br><input type="text"/> <input type="text"/><br>DON'T KNOW..98                                                                             | OBSERVED RECORD.....1<br>PROVIDER ESTIMATE.....2           |
| (04) Male condom             | YES .....1<br>NO .....2               | YES .....1<br>NO .....2<br>↓<br><b>(05)</b>                                                                   | Number...<br><input type="text"/> <input type="text"/><br>DON'T KNOW..98                                                        | Days...<br><input type="text"/> <input type="text"/> <input type="text"/><br>CONSTANT PROBLEM...995<br>DK.....998                                   | OBSERVED RECORD.....1<br>PROVIDER ESTIMATE.....2             | YES .....1<br>NO .....2<br>↓<br><b>(05)</b>                                                                      | Number...<br><input type="text"/> <input type="text"/><br>DON'T KNOW.....98                                                    | Days...<br><input type="text"/> <input type="text"/><br>DON'T KNOW..98                                                                             | OBSERVED RECORD.....1<br>PROVIDER ESTIMATE.....2           |

| METHOD                                   | Q131a. Is<br>METHOD<br>currently<br>available? | Q131b.<br>Has this<br>facility had<br>a stockout<br>of<br>METHOD<br>that lasted<br>at least 24<br>hours in<br>the last<br><b>one year</b> ? | Q131c. If<br>Yes, how<br>many times<br>has this<br>facility had a<br>stockout of<br>METHOD in<br>the past one<br>year?<br><br>(CHECK if<br>"Yes" to<br>Q131b) | Q131d. If Yes,<br>how many <b>total</b><br>days of stockout<br>of METHOD did<br>this facility<br>experience in the<br>past one year?<br><br>(CHECK if "Yes"<br>to Q131b) | Q131e. SOURCE<br>OF<br>INFORMATION<br>FOR STOCKOUTS<br>IN PAST ONE<br>YEAR: | Q131f. Has<br>this facility<br>had a<br>stockout of<br>METHOD that<br>lasted at least<br>24 hours in<br>the last 30<br>days (one<br>month)? | Q131g. If Yes,<br>how many times<br>has this facility<br>had a stockout of<br>METHOD in the<br>past 30 days?<br><br>(CHECK if "Yes"<br>to Q131f) | Q131h. If Yes,<br>how many <b>total</b><br>days of stockout<br>of METHOD did<br>this facility<br>experience in the<br>last 30 days?<br><br>(CHECK if "Yes"<br>to Q131f) | Q131i. SOURCE OF<br>INFORMATION ON<br>STOCKOUTS IN PAST<br>30 DAYS: |
|------------------------------------------|------------------------------------------------|---------------------------------------------------------------------------------------------------------------------------------------------|---------------------------------------------------------------------------------------------------------------------------------------------------------------|--------------------------------------------------------------------------------------------------------------------------------------------------------------------------|-----------------------------------------------------------------------------|---------------------------------------------------------------------------------------------------------------------------------------------|--------------------------------------------------------------------------------------------------------------------------------------------------|-------------------------------------------------------------------------------------------------------------------------------------------------------------------------|---------------------------------------------------------------------|
| (05) Female<br>condom                    | YES .....1<br>NO .....2                        | YES .....1<br>NO .....2<br>↓<br><b>(06)</b>                                                                                                 | Number...<br><br><input type="text"/> <input type="text"/><br><br>DON'T<br>KNOW..98                                                                           | Days...<br><br><input type="text"/> <input type="text"/> <input type="text"/><br><br>CONSTANT<br>PROBLEM...995<br>DK.....998                                             | OBSERVED<br>RECORD.....1<br><br>PROVIDER<br>ESTIMATE.....2                  | YES .....1<br>NO .....2<br>↓<br><b>(06)</b>                                                                                                 | Number...<br><br><input type="text"/> <input type="text"/><br><br>DON'T<br>KNOW.....98                                                           | Days...<br><br><input type="text"/> <input type="text"/><br><br>DON'T<br>KNOW..98                                                                                       | OBSERVED<br>RECORD.....1<br><br>PROVIDER<br>ESTIMATE.....2          |
| (06) Injectable<br>(DMPA,<br>Noristerat) | YES .....1<br>NO .....2                        | YES .....1<br>NO .....2<br>↓<br><b>(07)</b>                                                                                                 | Number...<br><br><input type="text"/> <input type="text"/><br><br>DON'T<br>KNOW..98                                                                           | Days...<br><br><input type="text"/> <input type="text"/> <input type="text"/><br><br>CONSTANT<br>PROBLEM...995<br>DK.....998                                             | OBSERVED<br>RECORD.....1<br><br>PROVIDER<br>ESTIMATE.....2                  | YES .....1<br>NO .....2<br>↓<br><b>(07)</b>                                                                                                 | Number...<br><br><input type="text"/> <input type="text"/><br><br>DON'T<br>KNOW.....98                                                           | Days...<br><br><input type="text"/> <input type="text"/><br><br>DON'T<br>KNOW..98                                                                                       | OBSERVED<br>RECORD.....1<br><br>PROVIDER<br>ESTIMATE.....2          |
| (07) Implants<br>(Jadelle/<br>Implanon)  | YES .....1<br>NO .....2                        | YES .....1<br>NO .....2<br>↓<br><b>(08)</b>                                                                                                 | Number...<br><br><input type="text"/> <input type="text"/><br><br>DON'T<br>KNOW..98                                                                           | Days...<br><br><input type="text"/> <input type="text"/> <input type="text"/><br><br>CONSTANT<br>PROBLEM...995<br>DK.....998                                             | OBSERVED<br>RECORD.....1<br><br>PROVIDER<br>ESTIMATE.....2                  | YES .....1<br>NO .....2<br>↓<br><b>(08)</b>                                                                                                 | Number...<br><br><input type="text"/> <input type="text"/><br><br>DON'T<br>KNOW.....98                                                           | Days...<br><br><input type="text"/> <input type="text"/><br><br>DON'T<br>KNOW..98                                                                                       | OBSERVED<br>RECORD.....1<br><br>PROVIDER<br>ESTIMATE.....2          |
| (08) IUCD                                | YES .....1<br>NO .....2                        | YES .....1<br>NO .....2<br>↓<br><b>(09)</b>                                                                                                 | Number...<br><br><input type="text"/> <input type="text"/><br><br>DON'T<br>KNOW..98                                                                           | Days...<br><br><input type="text"/> <input type="text"/> <input type="text"/><br><br>CONSTANT<br>PROBLEM...995<br>DK.....998                                             | OBSERVED<br>RECORD.....1<br><br>PROVIDER<br>ESTIMATE.....2                  | YES .....1<br>NO .....2<br>↓<br><b>(09)</b>                                                                                                 | Number...<br><br><input type="text"/> <input type="text"/><br><br>DON'T<br>KNOW.....98                                                           | Days...<br><br><input type="text"/> <input type="text"/><br><br>DON'T<br>KNOW..98                                                                                       | OBSERVED<br>RECORD.....1<br><br>PROVIDER<br>ESTIMATE.....2          |

|                               |                         |                                               |                                                                          |                                                                                                                   |                                                  |                                               |                                                                             |                                                                        |                                                  |
|-------------------------------|-------------------------|-----------------------------------------------|--------------------------------------------------------------------------|-------------------------------------------------------------------------------------------------------------------|--------------------------------------------------|-----------------------------------------------|-----------------------------------------------------------------------------|------------------------------------------------------------------------|--------------------------------------------------|
| (09) SDM/Cycle beads          | YES .....1<br>NO .....2 | YES .....1<br>NO .....2<br>↓<br><b>(10)</b>   | Number...<br><input type="text"/> <input type="text"/><br>DON'T KNOW..98 | Days...<br><input type="text"/> <input type="text"/> <input type="text"/><br>CONSTANT PROBLEM...995<br>DK.....998 | OBSERVED RECORD.....1<br>PROVIDER ESTIMATE.....2 | YES .....1<br>NO .....2<br>↓<br><b>(10)</b>   | Number...<br><input type="text"/> <input type="text"/><br>DON'T KNOW.....98 | Days...<br><input type="text"/> <input type="text"/><br>DON'T KNOW..98 | OBSERVED RECORD.....1<br>PROVIDER ESTIMATE.....2 |
| (10) Other (specify)<br>_____ | YES .....1<br>NO .....2 | YES .....1<br>NO .....2<br>↓<br><b>(Q132)</b> | Number...<br><input type="text"/> <input type="text"/><br>DON'T KNOW..98 | Days...<br><input type="text"/> <input type="text"/> <input type="text"/><br>CONSTANT PROBLEM...995<br>DK.....998 | OBSERVED RECORD.....1<br>PROVIDER ESTIMATE.....2 | YES .....1<br>NO .....2<br>↓<br><b>(Q132)</b> | Number...<br><input type="text"/> <input type="text"/><br>DON'T KNOW.....98 | Days...<br><input type="text"/> <input type="text"/><br>DON'T KNOW..98 | OBSERVED RECORD.....1<br>PROVIDER ESTIMATE.....2 |

|                                                                                                                                                        |                                   |               |                                           |
|--------------------------------------------------------------------------------------------------------------------------------------------------------|-----------------------------------|---------------|-------------------------------------------|
| Q132.                                                                                                                                                  | RECORD THE TIME<br>[24-HOUR TIME] | Hour .....    | <input type="text"/> <input type="text"/> |
|                                                                                                                                                        |                                   | Minutes ..... | <input type="text"/> <input type="text"/> |
| Thank you very much for taking the time to answer my questions. Once again, any information you have given will be kept confidential. Have a good day! |                                   |               |                                           |
| COMMENTS:                                                                                                                                              |                                   |               |                                           |
|                                                                                                                                                        |                                   |               |                                           |
